# Supplementary material for: One pot iridium-catalyzed asymmetrical double allylations of sodium sulfide: a fast and economic way to construct chiral C2-symmetric bis(1-substituted-allyl)sulfane
Source: Royal Society of Chemistry journal article supplement (doi:10.1039/c1cc11930c), 2011-01-01
Supplement: c1cc11930c.pdf [file c1cc11930c.pdf]

# One Pot Iridium-Catalyzed Asymmetrical Double Allylations of Sodium Sulfide: a Fast and Economic Way to Construct Chiral C<sub>2</sub>-Symmetric Bis(1-Substituted-Allyl)Sulfane

Shengcai Zheng, Weiqing Huang, Ning Gao, Ruimin Cui, Min Zhang, Xiaoming Zhao\*

*Department of Chemistry, Tongji University, 1239 Siping Lu, Shanghai 200092, P.R. China; and  
Key Laboratory of Organofluorine Chemistry, Shanghai Institute of Organic Chemistry, Chinese  
Academy of Sciences, 354 Fenglin Road, Shanghai 200032, P. R.China*

*E-mail: [xmzhao08@mail.tongji.edu.cn](mailto:xmzhao08@mail.tongji.edu.cn)*

## Supporting Information

### Table of Contents

|                                                                                                                                      |      |
|--------------------------------------------------------------------------------------------------------------------------------------|------|
| General.....                                                                                                                         | S-1  |
| General Procedure for the Iridium(I)-Catalyzed Diastereoselective Allylic Alkylation of Na <sub>2</sub> S • 9H <sub>2</sub> O: ..... | S-2  |
| HPLC Chromatograms of the Chiral Compounds .....                                                                                     | S-7  |
| NMR Spectra of the compounds <b>4</b> , <b>5</b> , <b>6</b> and <b>7</b> .....                                                       | S-19 |
| X-ray Crystallography of ( <i>R,R</i> )- <b>6f</b> .....                                                                             | S-41 |

**General:** All manipulations were carried out under an argon atmosphere using standard Schlenk techniques. All glassware was oven or flame dried immediately prior to use. All solvents were purified and dried according to standard methods prior to use, unless stated otherwise.

All reagents were obtained from commercial sources and used without further purification. <sup>1</sup>H NMR spectra were obtained at 300 MHz or 400 MHz and recorded relative to tetramethylsilane signal (0 ppm) or residual protio-solvent. <sup>13</sup>C NMR spectra were obtained at 75 MHz or 100 MHz and chemical shifts were recorded relative to the solvent resonance (CDCl<sub>3</sub>, 77.0 ppm). <sup>19</sup>F NMR spectra were obtained at 282 MHz, and CF<sub>3</sub>CO<sub>2</sub>H was used as internal standard. Data for <sup>1</sup>H NMR are recorded as follows: chemical shift (δ, ppm), multiplicity (s = singlet, d = doublet, t = triplet, m = multiplet or unresolved, br = broad singlet, coupling constant(s) in Hz, integration). Data for <sup>13</sup>C NMR are reported in terms of chemical shift (δ, ppm).

The phosphoramidite ligands<sup>1</sup>, substituted allylic carbonates<sup>2</sup> were prepared according to known procedures.

### Reference:

1. a) A. Alexakis, S. Rosset, J. Allamand, S. March, F. Guillen, C. Benhaim, *Synlett* **2001**, 9, 1375; b) R. Naasz, L. A. Arnold, A. J. Minnaard, B. L. Feringa, *Angew. Chem. Int. Ed.* **2001**, 40, 927; c) K. Tissot-Croset, D. Polet, A. Alexakis, *Synthesis* **2004**, 15, 2586.
2. P. G. M. Wuts, S. W. Ashford, A. M. Anderson, J. R. Atkins, *Org. Lett.* **2003**, 5, 1483.
3. **6f** was prepared according to the literature: Q. Yao, *Org. Lett.* **2002**, 4, 427.

**General procedure for the iridium-catalyzed regio-, diastereo-, and enantioselective allylic alkylation of  $\text{Na}_2\text{S} \cdot 9\text{H}_2\text{O}$ :**

$[\text{Ir}(\text{COD})\text{Cl}]_2$  (0.002 mmol, 1 mol%), phosphoramidite ligand **1a** [*O,O'*-(*S*)-(1,1'-dinaphthyl-2,2'-diyl)-*N,N'*-di-(*S,S*)-[phenylethylphosphoramidite] (0.004 mmol, 2 mol%) were dissolved in THF (0.5 mL) and propylamine (0.2 mL) in a dry Schlenk tube filled with argon. The reaction mixture was heated at 50°C for 30 min and then the volatile solvents were removed under vacuum to give a yellow solid. After that, allylic carbonate **3** (0.20 mmol, 100 mol%), Sodium sulfide hydrate **2c** (0.60 mmol, 300 mol %), cesium fluoride (0.60 mmol, 300 mol%), and DCM (2.0 mL) were added. The reaction was stirring at room temperature until **3** was completely consumed. Then the crude reaction mixture was filtrated with celite and the solvent was removed under reduced pressure. The crude residue was purified by flash column chromatography (petroleum ether/dichloromethane) to give the desired products **4**.

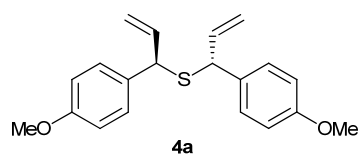

**bis((*R*)-1-(4-methoxyphenyl)allyl)sulfane (4a)**: colorless oil, 99% yield, b/l = >99/1 DL/Meso = 98/2, >99% *ee*. The *ee* of the product was determined by HPLC. [Diacel CHIRALPAK AD-H (0.46 cm x 25 cm); hexane/2-propanol = 98/2; flow rate = 0.7 mL/min; detection wavelength = 214 nm;  $t_{\text{R}}$  = 11.544 (meso), 14.450 (major) min].  $[\alpha]_{\text{D}}^{20}$  = -142.0° (c 0.5,  $\text{CHCl}_3$ ).  $^1\text{H}$  NMR (300 MHz,  $\text{CDCl}_3$ )  $\delta$  = 7.24 (d,  $J$  = 8.4 Hz, 4H), 6.84 (d,  $J$  = 8.8 Hz, 4H), 6.04 (ddd,  $J$  = 16.8, 10.2, 8.7 Hz, 2H), 5.16(ddd,  $J$  = 10.2,  $J^{\text{8}} = 1.5$ ,  $J^{\text{8}} = 0.6$  Hz, 2H), 5.13(ddd,  $J$  = 16.8,  $J^{\text{8}} = 1.2$ ,  $J^{\text{8}} = 0.9$  Hz, 2H) 4.27 (d,  $J$  = 8.7 Hz, 1H), 3.77 (s, 6H).  $^{13}\text{C}$  NMR (75 MHz,  $\text{CDCl}_3$ )  $\delta$  = 158.7, 138.2, 132.0, 128.9, 115.5, 113.9, 55.2, 51.7. HRMS (EI) calcd for  $\text{C}_{20}\text{H}_{22}\text{O}_2\text{S}$  ( $\text{M}^+$ ): 326.1341, Found: 326.1345. IR(KBr):  $\nu_{\text{max}}$  ( $\text{cm}^{-1}$ ) = 3902, 3852, 3751, 3648, 3629, 2834, 1866, 1772, 1538, 1504, 1456, 1247, 1174, 1032, 830, 419.

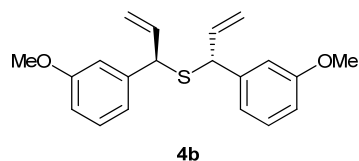

**bis((*R*)-1-(3-methoxyphenyl)allyl)sulfane (4b)**: colorless oil, 99% yield, b/l = >99/1, DL/Meso = 97/3, 97% *ee*. The *ee* of the product was determined by HPLC. [Diacel CHIRALCEL OJ-H (0.46 cm x 25 cm); hexane/2-propanol = 80/20; flow rate = 0.7 mL/min; detection wavelength = 214 nm;  $t_{\text{R}}$  = 31.400 (major), 34.869 (meso), 56.381 (minor) min].  $[\alpha]_{\text{D}}^{20}$  = -110.0° (c 0.7,  $\text{CHCl}_3$ ).  $^1\text{H}$  NMR (300 MHz,  $\text{CDCl}_3$ )  $\delta$  7.23 (t,  $J$  = 7.8 Hz, 2H), 6.91 (d,  $J$  = 7.8 Hz, 2H), 6.87 (s, 2H), 6.79 (d,  $J$  = 8.1 Hz, 2H), 6.05 (ddd,  $J$  = 17.4, 9.6, 9.0 Hz, 2H), 5.18 (d,  $J$  = 9.3 Hz, 2H), 5.16 (d,  $J$  = 17.4 Hz, 2H), 4.29 (d,  $J$  = 8.7 Hz, 2H), 3.79 (s, 6H).  $^{13}\text{C}$  NMR (75 MHz,  $\text{CDCl}_3$ )  $\delta$  = 159.7, 141.5, 137.9, 129.5, 120.2, 115.9, 113.3, 112.9, 55.1, 52.5. HRMS (EI) calcd for  $\text{C}_{20}\text{H}_{22}\text{O}_2\text{S}$  ( $\text{M}^+$ ): 326.1341, Found: 326.1344. IR(KBr):  $\nu_{\text{max}}$  ( $\text{cm}^{-1}$ ) = 3851, 3749, 3645, 3000, 2967, 2833, 1595, 1485, 1264, 1149, 1047, 919, 764, 693, 455.

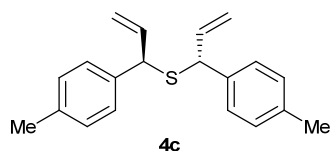

**bis((R)-1-p-tolylallyl)sulfane (4c)**: colorless oil, 99% yield, b/l = >99/1, DL/Meso = 96/4, >99% *ee*. The *ee* of the product was determined by HPLC. [Diacel CHIRALCEL OJ-H (0.46 cm x 15 cm); hexane/2-propanol = 97/3; flow rate = 1.0 mL/min; detection wavelength = 214 nm;  $t_R$  = 8.245 (major), 12.279 (minor), 14.984 (meso) min].  $[\alpha]_D^{20} = -97.8^\circ$  (c 0.3, CHCl<sub>3</sub>). <sup>1</sup>H NMR (300 MHz, CDCl<sub>3</sub>)  $\delta$  = 7.21 (d,  $J$  = 7.8 Hz, 4H), 7.12 (d,  $J$  = 7.8 Hz, 4H), 6.05 (ddd,  $J$  = 16.8, 9.9, 8.7 Hz, 2H), 5.15 (d,  $J$  = 9.3 Hz, 2H), 5.13 (d,  $J$  = 17.4 Hz, 2H), 4.28 (d,  $J$  = 8.7 Hz, 2H), 2.32 (s, 6H). <sup>13</sup>C NMR (75 MHz, CDCl<sub>3</sub>)  $\delta$  = 138.2, 137.0, 136.9, 129.3, 127.8, 115.7, 52.2, 20.9. HRMS (EI) calcd for C<sub>20</sub>H<sub>22</sub>S (M<sup>+</sup>): 294.1442, Found: 294.1444. IR(KBr):  $\nu_{\max}$  (cm<sup>-1</sup>) = 2913, 2847, 1681, 1509, 1010, 798, 506, 470.

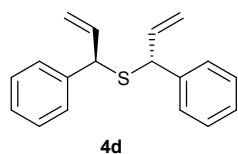

**bis((R)-1-phenylallyl)sulfane (4d)**: colorless oil, 99% yield, b/l = 96/4, DL/Meso = 95/5, 96% *ee*. The *ee* of the product was determined by HPLC. [Diacel CHIRALCEL OJ-H (0.46 cm x 25 cm); hexane/2-propanol = 90/10; flow rate = 0.7 mL/min; detection wavelength = 214 nm;  $t_R$  = 28.335 (meso), 29.566 (minor), 30.970 (major) min].  $[\alpha]_D^{20} = -130.4^\circ$  (c 0.5, CHCl<sub>3</sub>). <sup>1</sup>H NMR (300 MHz, CDCl<sub>3</sub>)  $\delta$  = 7.32-7.23 (m, 10H), 6.07 (ddd,  $J$  = 17.1, 9.6 Hz, 8.7, 2H), 5.18 (d,  $J$  = 9.6, 2H), 5.15 (d,  $J$  = 17.1, 2H), 4.32 (d,  $J$  = 8.4 Hz, 2H). <sup>13</sup>C NMR (75 MHz, CDCl<sub>3</sub>)  $\delta$  = 140.1, 138.1, 128.6, 127.9, 127.3, 115.9, 52.4. HRMS (EI) calcd for C<sub>18</sub>H<sub>18</sub>S (M<sup>+</sup>): 226.1129, Found: 226.1128. IR(KBr):  $\nu_{\max}$  (cm<sup>-1</sup>) = 3903, 3853, 3750, 3735, 3675, 3648, 3628, 3566, 3028, 1868, 1770, 1730, 1679, 1557, 1505, 1455, 985, 914, 696, 423.

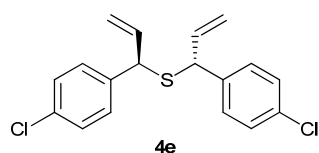

**bis((R)-1-(4-chlorophenyl)allyl)sulfane (4e)**: colorless oil. 80% yield, b/l = >99/1, DL/Meso = 96/4, >99% *ee*. The *ee* of the product was determined by HPLC. [Diacel CHIRALPAK AD-H (0.46 cm x 25 cm); hexane/2-propanol = 98/2; flow rate = 0.7 mL/min; detection wavelength = 214 nm;  $t_R$  = 5.382 (meso), 5.662 (major) min].  $[\alpha]_D^{20} = -166.8^\circ$  (c 0.5, CHCl<sub>3</sub>). <sup>1</sup>H NMR (300 MHz, CDCl<sub>3</sub>)  $\delta$  = 7.29 (d,  $J$  = 8.4 Hz, 4H), 7.23 (d,  $J$  = 8.4 Hz, 4H), 6.00 (ddd,  $J$  = 17.1, 9.9, 8.4 Hz, 2H), 5.20 (d,  $J$  = 10.5 Hz, 2H), 5.14 (d,  $J$  = 17.1 Hz, 2H), 4.26 (d,  $J$  = 8.4 Hz, 2H). <sup>13</sup>C NMR (75 MHz, CDCl<sub>3</sub>)  $\delta$  = 138.4, 137.3, 133.2, 129.3, 128.8, 116.6, 51.7. HRMS (EI) calcd for C<sub>18</sub>H<sub>16</sub>SCl<sub>2</sub> (M<sup>+</sup>): 334.0350, Found: 334.0349. IR(KBr):  $\nu_{\max}$  (cm<sup>-1</sup>) = 3903, 3869, 3852, 3837, 3750, 3735, 3710, 3689, 3676, 3648, 3627, 3565, 3077, 1718, 1651, 1557, 1539, 1505, 1487, 1455, 1091, 1013, 920, 820.

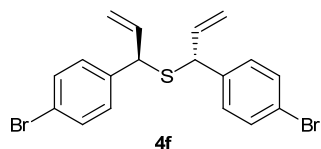

**bis((R)-1-(4-bromophenyl)allyl)sulfane (4f)**: colorless oil, 72% yield, b/l = 98/2, DL/Meso = 97/3, >99% ee. The ee of the product was determined by HPLC. [Diacel CHIRALCEL AY-H (0.46 cm x 25 cm); hexane/2-propanol = 99.5/0.5; flow rate = 0.8 mL/min; detection wavelength = 214 nm;  $t_R$  = 6.285 (meso), 7.103 (major) min].  $[\alpha]_D^{20} = -117.6^\circ$  (c 0.5,  $\text{CHCl}_3$ ).  $^1\text{H NMR}$  (300 MHz,  $\text{CDCl}_3$ )  $\delta$  = 7.44 (d,  $J$  = 8.4 Hz, 4H), 7.17 (d,  $J$  = 8.4 Hz, 4H), 5.99 (ddd,  $J$  = 16.8, 9.9, 8.7 Hz, 2H), 5.20 (d,  $J$  = 9.9 Hz, 2H), 5.13 (d,  $J$  = 16.8 Hz, 2H), 4.24 (d,  $J$  = 8.4 Hz, 2H).  $^{13}\text{C NMR}$  (75 MHz,  $\text{CDCl}_3$ )  $\delta$  = 138.8, 137.3, 131.7, 129.7, 121.2, 116.6, 51.7. HRMS (EI) calcd for  $\text{C}_{18}\text{H}_{16}\text{S}^{79}\text{Br}_2$  ( $\text{M}^+$ ): 421.9339, Found: 421.9348. IR(KBr):  $\nu_{\text{max}}$  ( $\text{cm}^{-1}$ ) = 3903, 3852, 3802, 3751, 3734, 3676, 3649, 3628, 3567, 2925, 2363, 1870, 1732, 1717.89, 1653, 1560, 1486, 1455, 1286, 1071, 1009, 919, 815, 750, 517, 418.

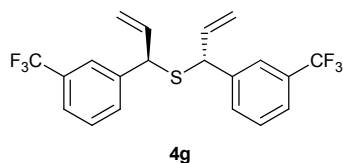

**bis((R)-1-(3-(trifluoromethyl)phenyl)allyl)sulfane (4g)**: colorless oil, 67% yield, b/l = 97/3, DL/Meso = 96/4, >99% ee. The ee of the product was determined by HPLC. [Diacel CHIRALCEL OJ-H (0.46 cm x 15 cm); hexane/2-propanol = 99.8/0.2; flow rate = 1.0 mL/min; detection wavelength = 214 nm;  $t_R$  = 3.162 (meso), 3.631 (major) min].  $[\alpha]_D^{20} = -113.8^\circ$  (c 0.7,  $\text{CHCl}_3$ ).  $^1\text{H NMR}$  (300 MHz,  $\text{CDCl}_3$ )  $\delta$  = 7.54-7.51 (m, 6H), 7.49-7.39 (m, 2H), 6.05 (ddd,  $J$  = 17.1, 9.9, 8.7 Hz, 2H), 5.26 (d,  $J$  = 9.9 Hz, 2H), 5.19 (d,  $J$  = 17.1 Hz, 2H), 4.37 (d,  $J$  = 8.7 Hz, 2H).  $^{13}\text{C NMR}$  (75 MHz,  $\text{CDCl}_3$ )  $\delta$  = 140.8, 136.9, 131.4, 131.1 (q,  $J$  = 30.0 Hz), 129.2, 124.8 (q,  $J$  = 3.8 Hz), 124.4 (q,  $J$  = 3.8 Hz), 124.0 (q,  $J$  = 270.7 Hz), 117.2, 52.1.  $^{19}\text{F NMR}$  (282 MHz,  $\text{CDCl}_3$ )  $\delta$  = -62.60(s). HRMS (EI) calcd for  $\text{C}_{20}\text{H}_{16}\text{F}_6\text{S}$  ( $\text{M}^+$ ): 402.0877, Found: 402.0878. IR(KBr):  $\nu_{\text{max}}$  ( $\text{cm}^{-1}$ ) = 3851, 3733, 3646, 1714, 1633, 1555, 1447, 1332, 1165, 1125, 1073, 924, 770, 702, 418.

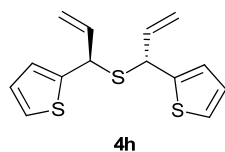

**bis((R)-1-(thiophen-2-yl)allyl)sulfane (4h)**: colorless oil. 99% yield, b/l = >99/1, DL/Meso = >99/1, >99% ee. The ee of the product was determined by HPLC. [Diacel CHIRALCEL OJ-H (0.46 cm x 15 cm); Hexane/ n-propanol (0.1%DEA) = 99/1 (v/v); flow rate = 1.0 mL/min; detection wavelength = 214 nm;  $t_R$  = 13.363 (meso), 14.090 (major), 19.642 (minor) min].  $[\alpha]_D^{20} = -63.6^\circ$  (c 0.5,  $\text{CHCl}_3$ ).  $^1\text{H NMR}$  (300 MHz,  $\text{CDCl}_3$ )  $\delta$  = 7.23 (d,  $J$  = 5.1 Hz, 2H), 7.08-6.89 (m, 4H), 6.06 (ddd,  $J$  = 16.8, 9.9, 8.7 Hz, 2H), 5.24 (d,  $J$  = 9.0 Hz, 2H), 5.19 (d,  $J$  = 15.9 Hz, 2H), 4.65 (d,  $J$  = 8.7 Hz, 2H).  $^{13}\text{C NMR}$  (75 MHz,  $\text{CDCl}_3$ )  $\delta$  = 143.3, 137.6, 126.7, 125.2, 124.9, 116.6, 47.7. HRMS (EI) calcd for  $\text{C}_{14}\text{H}_{14}\text{S}_3$  ( $\text{M}^+$ ): 278.0258, Found: 278.0260. IR(KBr):  $\nu_{\text{max}}$  ( $\text{cm}^{-1}$ ) = 3903, 3852,

3819, 3749, 3735, 3675, 3648 3628, 3566, 3080, 1869, 1716, 1653, 1635, 1558, 1541, 1506, 1232, 986, 920, 853, 696.

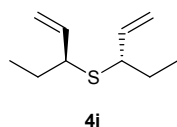

**di(S)-pent-1-en-3-ylsulfane 4i**: colorless oil, 84% yield, b/l = 81/19, DL/Meso =85/15, 98% ee. Determination of the ee of **4i** was performed by GC on a Rtx-13100 (30m x 0.25mm x 0.25um) column, He-flow 1.0 ml/min., split ratio: 100:1. oven temp. 150 °C, Hold 10 min, inlet temp: 250 °C.,  $t_R$  =3.226 (major), 3.415 (minor), 4.103 (meso) min.  $[\alpha]_D^{20} = -85.0^\circ$  (c 0.1, CHCl<sub>3</sub>). <sup>1</sup>H NMR (400 MHz, CDCl<sub>3</sub>)  $\delta = 5.57$  (dt,  $J = 16.8, 10.0$  Hz, 2H), 5.05 (dd,  $J = 10.0, \underline{J^s} = 1.6$  Hz, 2H), 4.94 (ddd,  $J = 16.8, \underline{J^s} = 1.6$  Hz,  $\underline{J^s} = 0.4$  Hz, 2H), 3.08-3.00 (m, 2H), 1.70-1.48 (m, 4H), 0.95 (t,  $J = 7.6$  Hz, 6H).

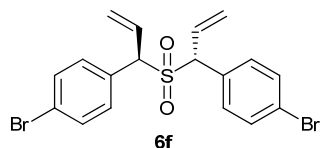

**4,4'-(1R,1'R)-1,1'-sulfonylbis(prop-2-ene-1,1-diyl)bis(bromobenzene) (6f)**<sup>3</sup>: white powder. mp: 147.6-149.5, 73% yield, 99% ee. The ee of the product was determined by [Diacel CHIRALPAK AD (0.46 cm x 25 cm); Hexane/ *i*-propanol=90/10 (v/v); flow rate = 1.0 mL/min; detection wavelength = 214 nm;  $t_R = 21.719$  (major)].  $[\alpha]_D^{20} = -69.0^\circ$  (c 0.6, CHCl<sub>3</sub>). <sup>1</sup>H NMR (400 MHz, CDCl<sub>3</sub>)  $\delta = 7.52$  (d,  $J = 8.4$  Hz, 4H), 7.24 (d,  $J = 8.0$  Hz, 4H), 6.28 (ddd,  $J = 16.8, 10.0, 8.8$  Hz, 2H), 5.56 (d,  $J = 10.4$  Hz, 2H), 5.40 (d,  $J = 17.2$  Hz, 1H), 4.76 (d,  $J = 8.8$  Hz, 2H). <sup>13</sup>C NMR (100 MHz, CDCl<sub>3</sub>)  $\delta = 132.1, 131.4, 130.2, 129.8, 123.8, 123.6, 69.0$ . HRMS (ESI-) calcd for C<sub>18</sub>H<sub>15</sub>O<sub>2</sub>SBr<sub>2</sub>(M<sup>+</sup>): 452.9159, Found: 452.9165. IR(KBr):  $\nu_{max}$  (cm<sup>-1</sup>) = 3850, 3647, 1482, 1402, 1314, 1275, 1257, 1128, 1071, 1005, 939, 833, 762, 749, 713, 630, 510.

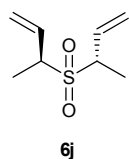

**(S)-3-((S)-but-3-en-2-ylsulfonyl)but-1-ene (6j)**: (51% one pot yield from **3j**, DL/Meso =89/11,b/l =87/13, 99% ee. The ee of the product was determined by [Diacel CHIRALCEL IC (0.46 cm x 15 cm); Hexane/ *n*-propanol=90/10 (v/v); flow rate = 1.0 mL/min; detection wavelength = 214 nm;  $t_R = 29.080$  (major), 34.088 (minor) min].  $[\alpha]_D^{20} = -118.3^\circ$  (c 0.1, CHCl<sub>3</sub>). <sup>1</sup>H NMR (400 MHz, CDCl<sub>3</sub>)  $\delta = 5.86$  (ddd,  $J = 17.2, 10.4, 8.8$  Hz, 2H), 5.41 (d,  $J = 10.0$ Hz, 2H), 5.34 (d,  $J = 17.2$  Hz, 2H), 3.88 (dq,  $J = 8.8, 7.2$  Hz, 1H).

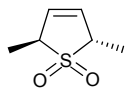

**7j**

**(2*S*,5*S*)-2,5-dimethyl-2,5-dihydrothiophene 1,1-dioxide (7j)**: To a solution of **6j** (17.0 mg, 0.1 mmol) in 4 mL CH<sub>2</sub>Cl<sub>2</sub> was added Grubbs catalyst 1st (3.3 mg, 0.004 mmol) and the reaction mixture was heated to reflux under Ar over night and could be monitored by TLC. The reaction was then cooled to rt and concentrated to dryness under vacuum after **6j** was completely consumed. Flash chromatography on silica gel (petroleum ether/ethyl acetate = 5:1) gave **7j** (12.3 mg, 86% yield, 94% ee) as a colorless thick oil. The ee of the product was determined by [Diacel CHIRALPAK AD-H (0.46 cm x 25 cm); Hexane/*i*-propanol=90/10 (v/v); flow rate = 1.0 mL/min; detection wavelength = 214 nm; t<sub>R</sub> = 15.424 (minor), 17.364 (major) min] to be 94%. [α]<sub>D</sub><sup>20</sup> = -128.2° (c 0.2, CHCl<sub>3</sub>). <sup>1</sup>H NMR (400 MHz, CDCl<sub>3</sub>) δ = 5.95 (s, 1H), 3.73 (q, *J* = 6.8 Hz, 1H), 1.44 (d, *J* = 7.2 Hz, 3H).

## HPLC Chromatograms of the Chiral Compounds

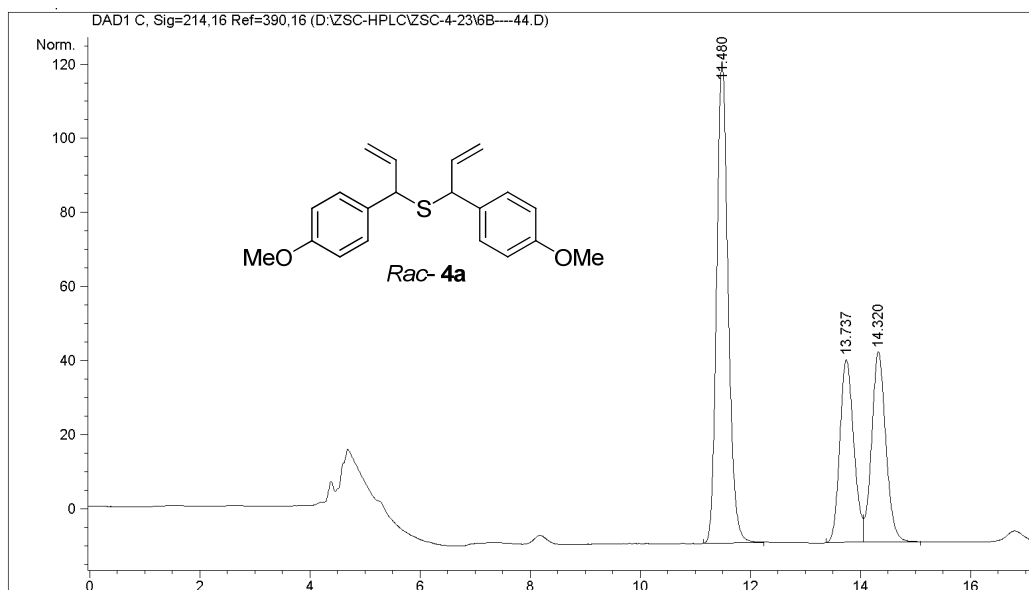

| Peak # | RetTime [min] | Type | Width [min] | Area [mAU*s] | Area %  |
|--------|---------------|------|-------------|--------------|---------|
| 1      | 11.480        | BB   | 0.2219      | 1896.13257   | 51.3510 |
| 2      | 13.737        | BV   | 0.2736      | 870.00647    | 23.5615 |
| 3      | 14.320        | VB   | 0.2785      | 926.35590    | 25.0875 |

Totals : 3692.49493

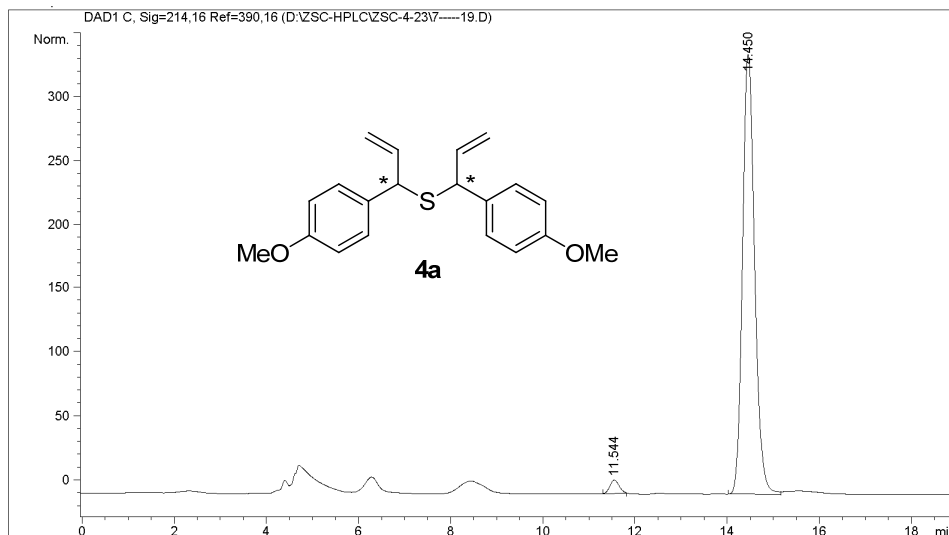

| Peak # | RetTime [min] | Type | Width [min] | Area [mAU*s] | Area %  |
|--------|---------------|------|-------------|--------------|---------|
| 1      | 11.544        | MM   | 0.2351      | 148.55974    | 2.3090  |
| 2      | 14.450        | BV   | 0.2849      | 6285.32959   | 97.6910 |

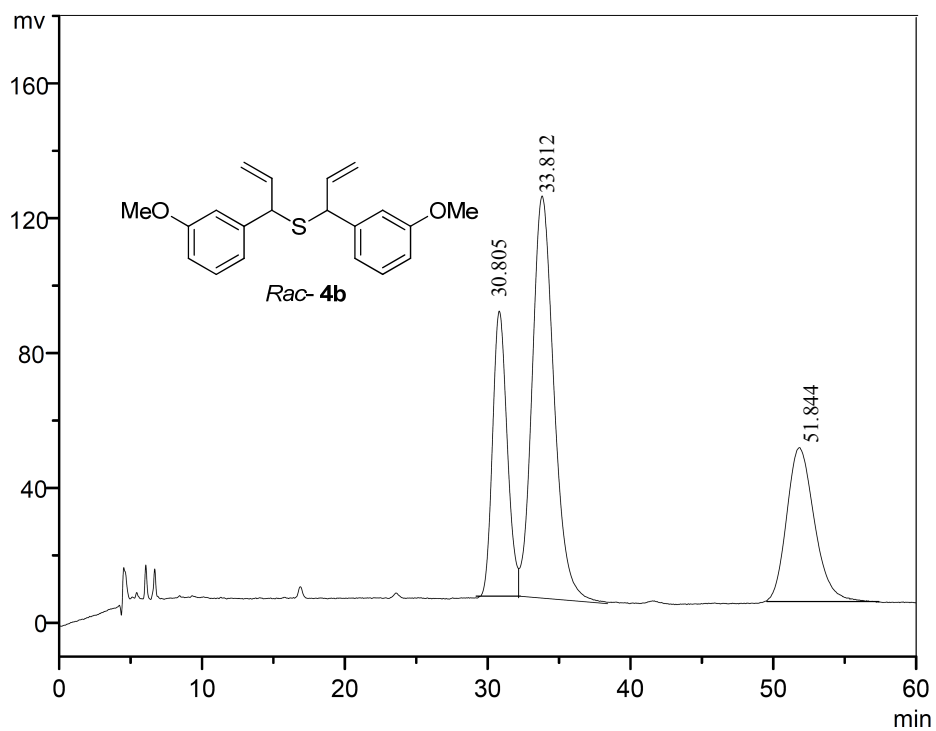

| Peak# | R.Time | I.Time | F.Time | Area     | Height | A/H      | Area(%) |
|-------|--------|--------|--------|----------|--------|----------|---------|
| 1     | 30.805 | 29.250 | 32.200 | 6155106  | 85245  | 72.2050  | 24.8525 |
| 2     | 33.812 | 32.200 | 37.408 | 12625318 | 19595  | 105.5680 | 50.9773 |
| 3     | 51.844 | 49.208 | 55.117 | 5986117  | 45389  | 131.8840 | 24.1702 |

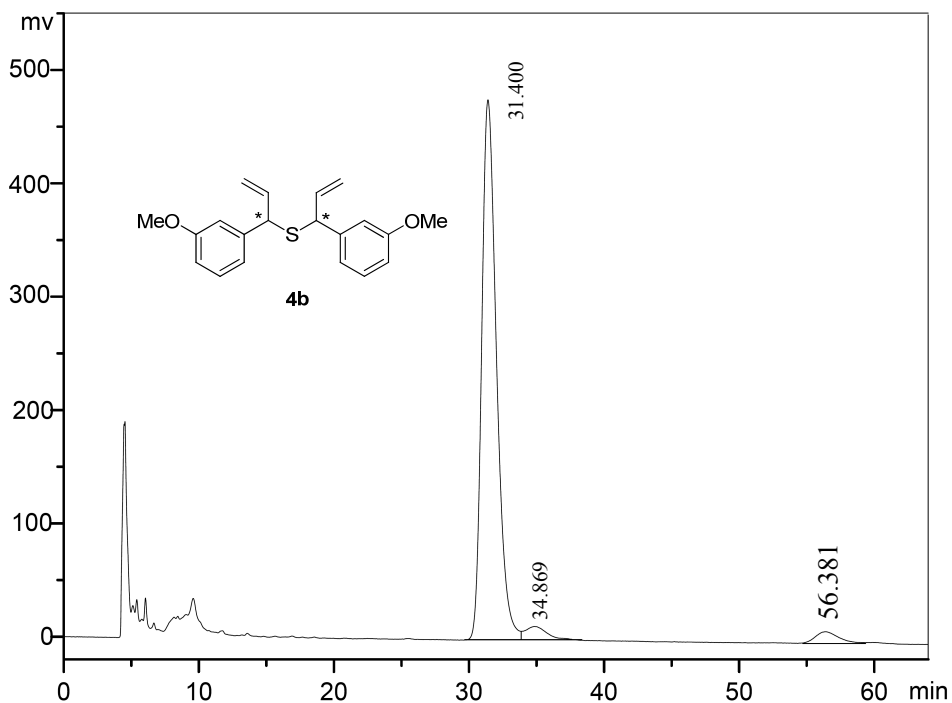

| Peak# | R.Time | I.Time | F.Time | Area     | Height | A/H      | Area(%) |
|-------|--------|--------|--------|----------|--------|----------|---------|
| 1     | 31.400 | 29.975 | 33.992 | 36501911 | 476972 | 76.5280  | 94.1760 |
| 2     | 34.869 | 33.992 | 37.208 | 1154867  | 11566  | 99.8500  | 2.9796  |
| 3     | 56.381 | 54.542 | 59.208 | 1102470  | 9828   | 112.1790 | 2.8444  |



p-Me

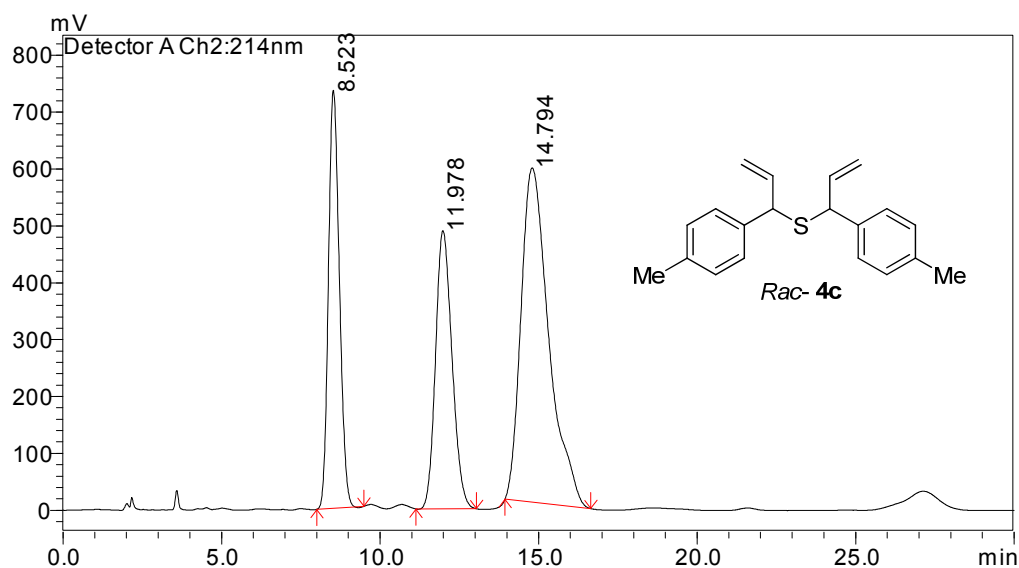

<Column Performance Report>

| Peak No. | Time   | Area     | Area %  | Plate number | Tailing | Resolution |
|----------|--------|----------|---------|--------------|---------|------------|
| 1        | 8.523  | 17601834 | 24.7754 | 2826.184     | 1.180   | --         |
| 2        | 11.978 | 17682081 | 24.8883 | 2477.761     | 1.189   | 4.309      |
| 3        | 14.794 | 35761802 | 50.3363 | 1463.590     | 1.482   | 2.244      |

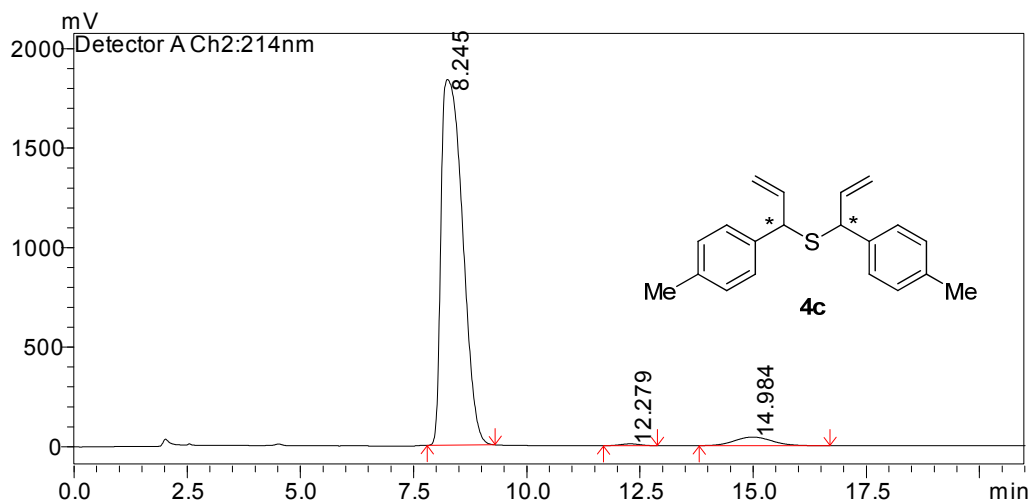

<Column Performance Report>

| Peak No. | Time   | Area     | Area %  | Plate number | Tailing | Resolution |
|----------|--------|----------|---------|--------------|---------|------------|
| 1        | 8.245  | 60716124 | 95.5165 | 1630.170     | 1.834   | --         |
| 2        | 12.279 | 293811   | 0.4622  | 3637.236     | 1.013   | 4.947      |
| 3        | 14.984 | 2556169  | 4.0213  | 1528.926     | 1.091   | 2.305      |

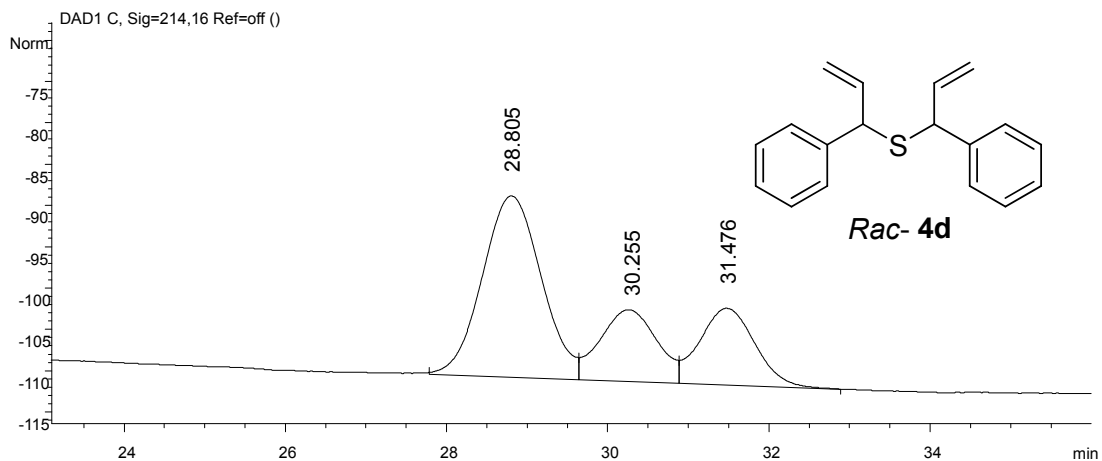

Signal 2: DAD1 C, Sig=214,16 Ref=off

| Peak # | RetTime [min] | Type | Width [min] | Area [mAU*s] | Area %  |
|--------|---------------|------|-------------|--------------|---------|
| 1      | 28.805        | BV   | 0.7885      | 1114.59607   | 56.3202 |
| 2      | 30.255        | VV   | 0.7390      | 422.14209    | 21.3307 |
| 3      | 31.476        | VB   | 0.7354      | 442.29727    | 22.3491 |

Totals : 1979.03543

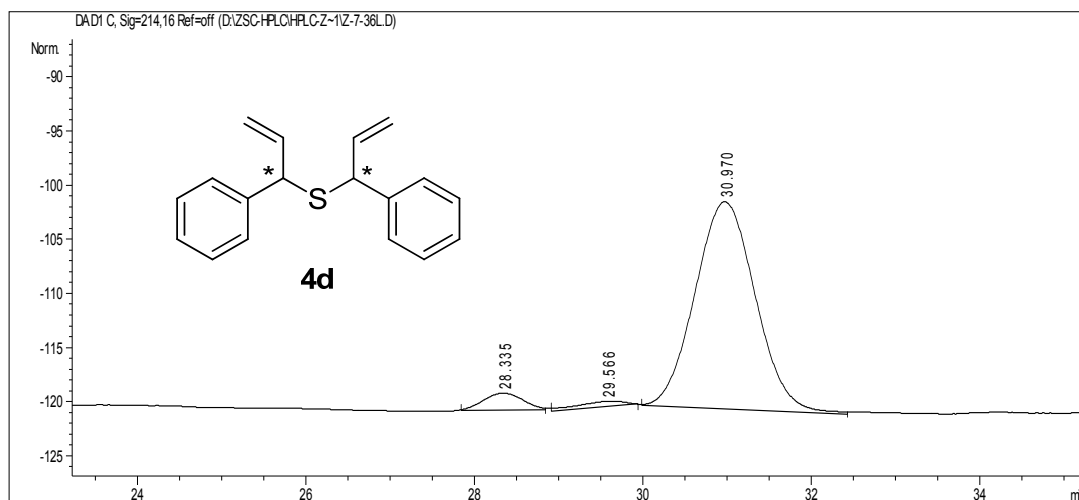

Signal 2: DAD1 C, Sig=214,16 Ref=off

| Peak # | RetTime [min] | Type | Width [min] | Area [mAU*s] | Area %  |
|--------|---------------|------|-------------|--------------|---------|
| 1      | 28.335        | MM   | 0.5436      | 50.97386     | 4.9860  |
| 2      | 29.566        | MM   | 0.6712      | 19.84482     | 1.9411  |
| 3      | 30.970        | MM   | 0.8289      | 951.51422    | 93.0728 |

Totals : 1022.33290

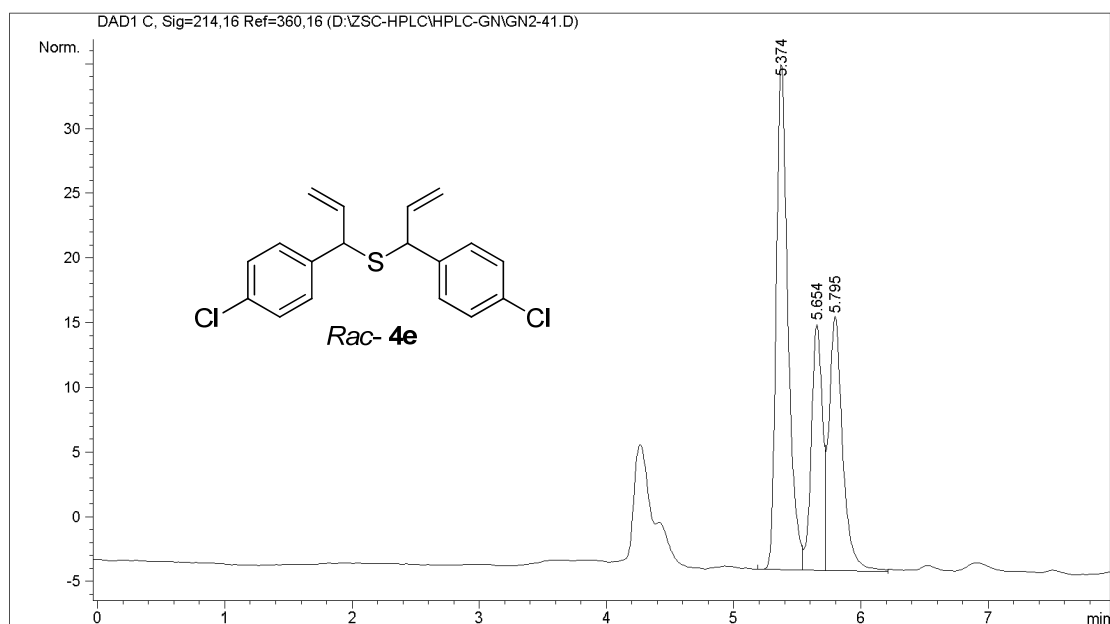

| Peak # | RetTime [min] | Type | Width [min] | Area [mAU*s] | Area %  |
|--------|---------------|------|-------------|--------------|---------|
| 1      | 5.374         | VV   | 0.1034      | 252.31023    | 48.8393 |
| 2      | 5.654         | VV   | 0.0955      | 116.52006    | 22.5546 |
| 3      | 5.795         | VB   | 0.1120      | 147.78236    | 28.6060 |

Totals : 516.61265

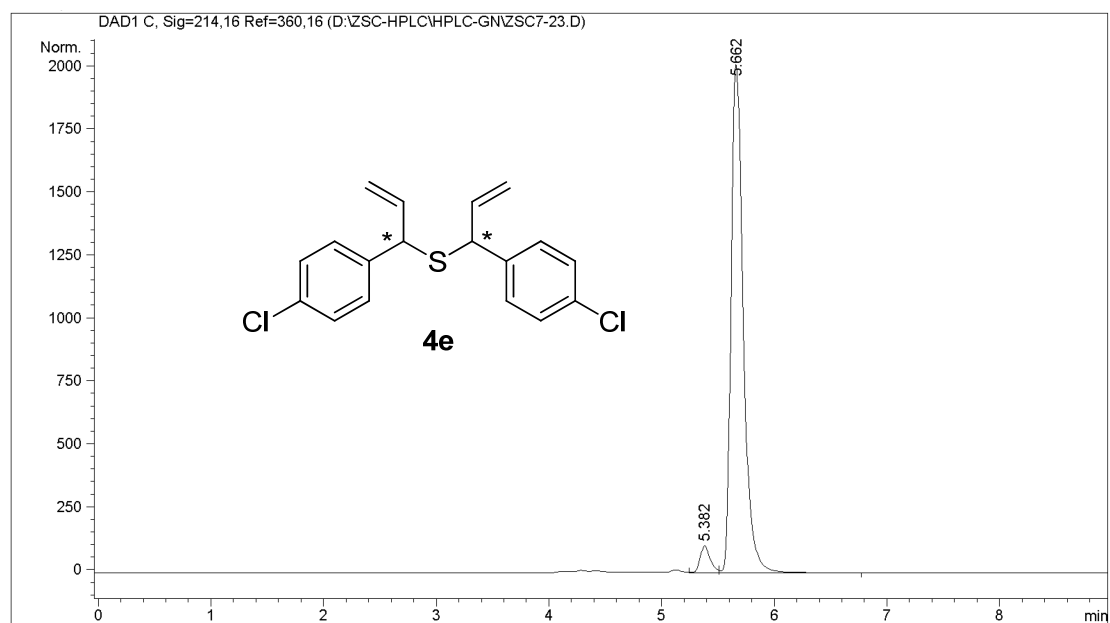

| Peak # | RetTime [min] | Type | Width [min] | Area [mAU*s] | Area %  |
|--------|---------------|------|-------------|--------------|---------|
| 1      | 5.382         | VV   | 0.0985      | 674.67163    | 4.2379  |
| 2      | 5.662         | VV   | 0.1208      | 1.52454e4    | 95.7621 |

< Chromatogram >

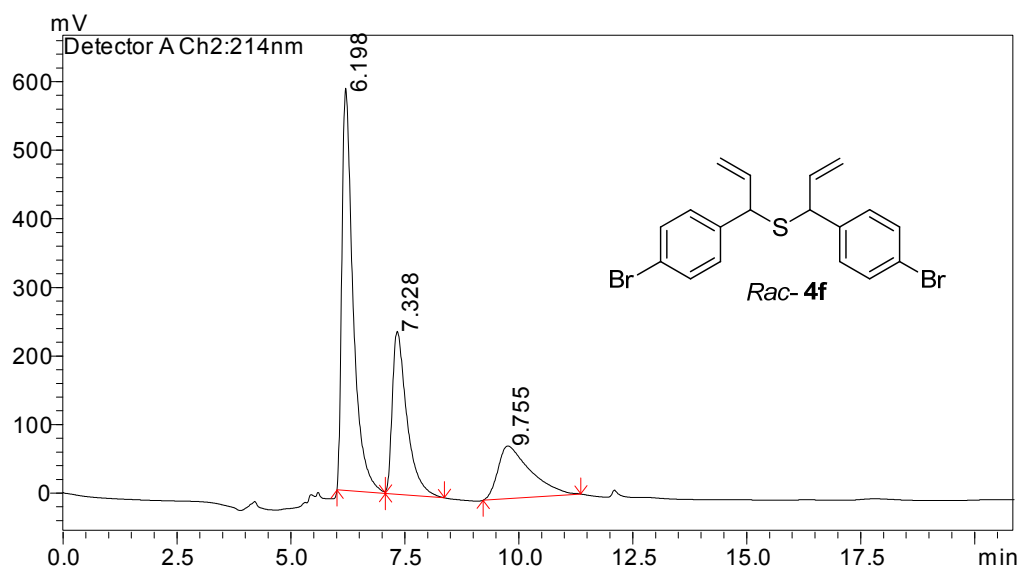

<Column Performance Report>

| Peak No. | Time  | Area     | Area %  | Plate number | Tailing | Resolution |
|----------|-------|----------|---------|--------------|---------|------------|
| 1        | 6.198 | 10084571 | 52.5781 | 3407.147     | 2.055   | --         |
| 2        | 7.328 | 5288720  | 27.5739 | 2789.017     | 1.977   | 2.307      |
| 3        | 9.755 | 3806895  | 19.8481 | 913.973      | 1.938   | 2.631      |

< Chromatogram >

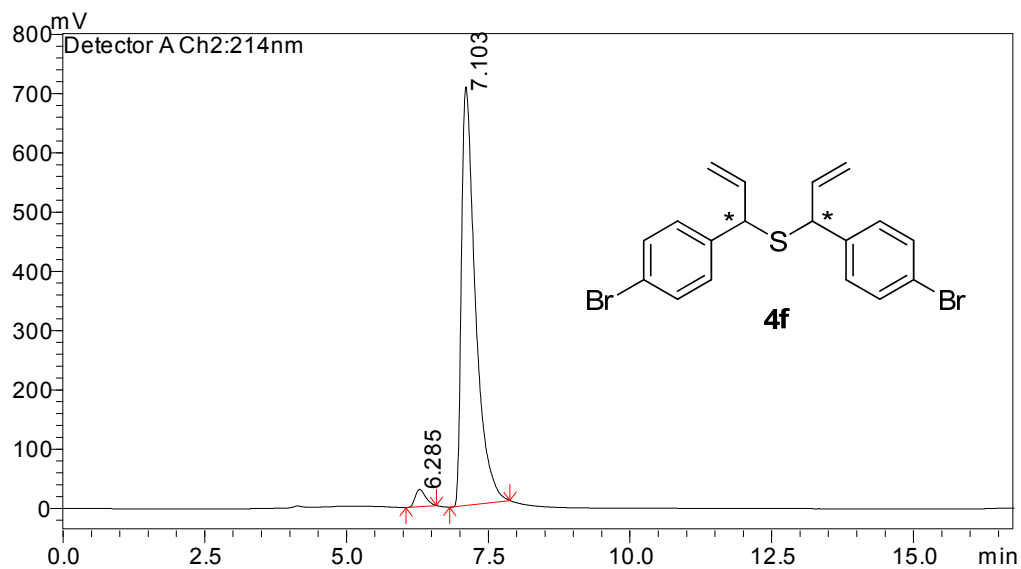

<Column Performance Report>

| Peak No. | Time  | Area     | Area %  | Plate number | Tailing | Resolution |
|----------|-------|----------|---------|--------------|---------|------------|
| 1        | 6.285 | 373963   | 2.9947  | 5111.440     | 1.354   | --         |
| 2        | 7.103 | 12113495 | 97.0053 | 4338.391     | 2.158   | 2.089      |

< Chromatogram >

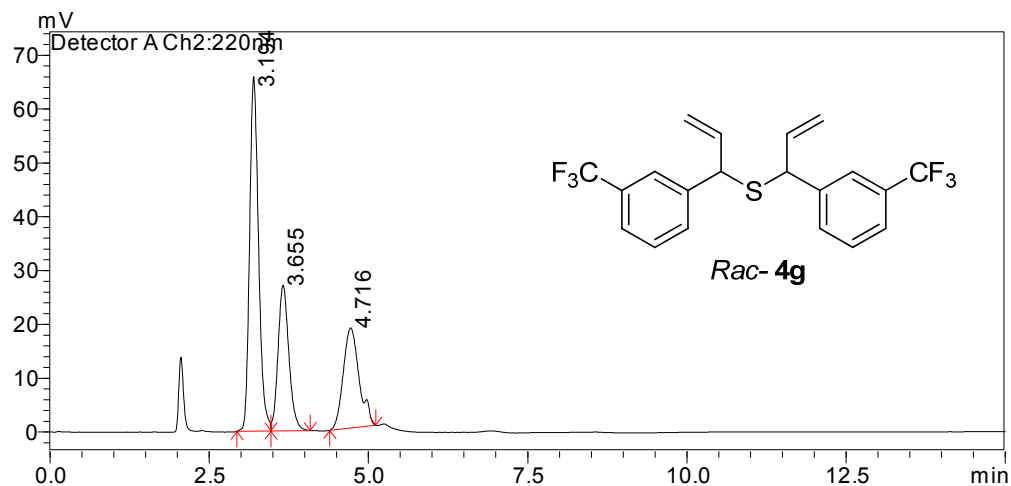

<Column Performance Report>

| Peak No. | Time  | Area   | Area %  | Plate number | Tailing | Resolution |
|----------|-------|--------|---------|--------------|---------|------------|
| 1        | 3.194 | 640033 | 49.7984 | 2404.719     | 1.272   | --         |
| 2        | 3.655 | 321517 | 25.0160 | 2128.590     | --      | 1.597      |
| 3        | 4.716 | 323697 | 25.1856 | 1830.644     | 1.175   | 2.800      |

< Chromatogram >

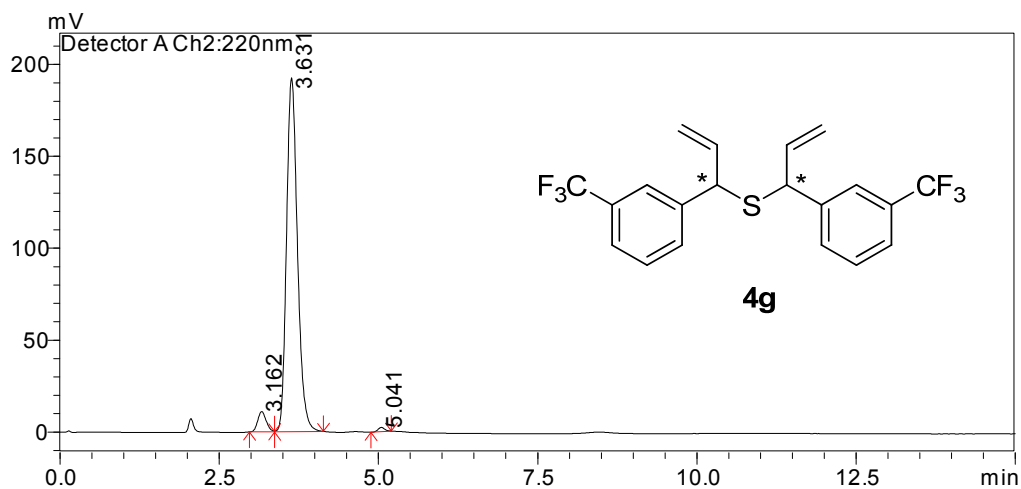

<Column Performance Report>

| Peak No. | Time  | Area    | Area %  | Plate number | Tailing | Resolution |
|----------|-------|---------|---------|--------------|---------|------------|
| 1        | 3.162 | 101463  | 4.1895  | 2513.122     | 1.189   | --         |
| 2        | 3.631 | 2303395 | 95.1091 | 2079.799     | 1.236   | 1.643      |
| 3        | 5.041 | 16988   | 0.7014  | 10159.847    | 1.153   | 5.439      |

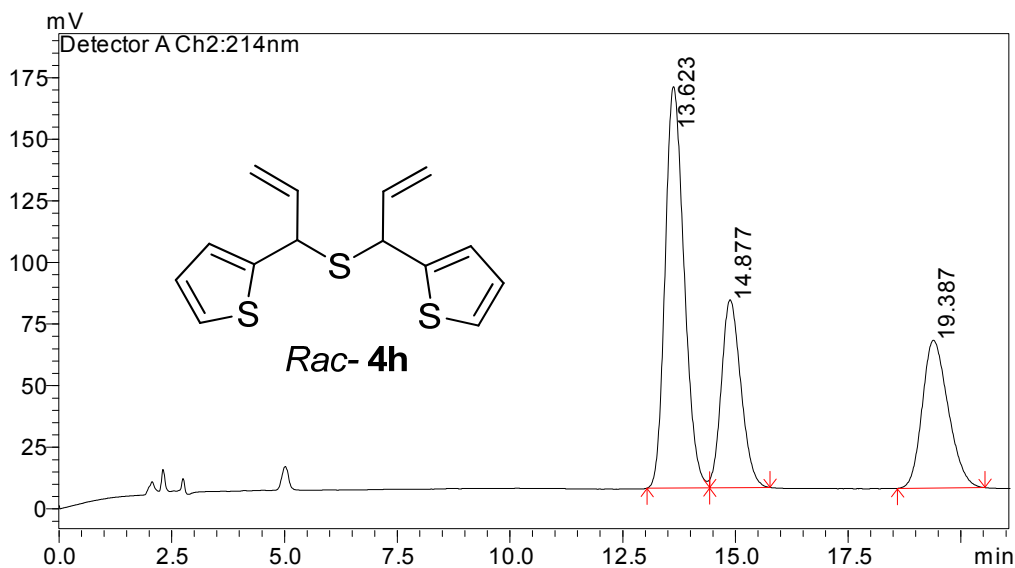

<Column Performance Report>

| Peak No. | Time   | Area    | Area %  | Plate number | Tailing | Resolution |
|----------|--------|---------|---------|--------------|---------|------------|
| 1        | 13.623 | 4778519 | 50.3680 | 4909.432     | 1.227   | --         |
| 2        | 14.877 | 2303029 | 24.2751 | 5510.176     | 1.182   | 1.589      |
| 3        | 19.387 | 2405669 | 25.3570 | 5288.922     | 1.245   | 4.829      |

< Chromatogram >

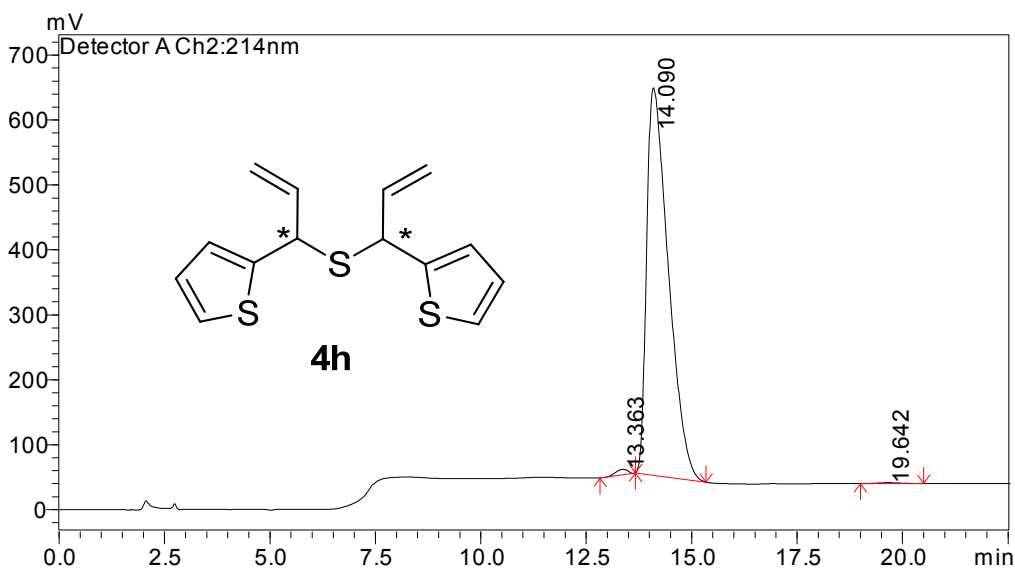

<Column Performance Report>

| Peak No. | Time   | Area     | Area %  | Plate number | Tailing | Resolution |
|----------|--------|----------|---------|--------------|---------|------------|
| 1        | 13.363 | 164194   | 0.7609  | 10088.564    | 0.858   | --         |
| 2        | 14.090 | 21362529 | 99.0000 | 3419.560     | 1.871   | 0.972      |
| 3        | 19.642 | 51585    | 0.2391  | 6865.840     | 1.075   | 5.808      |

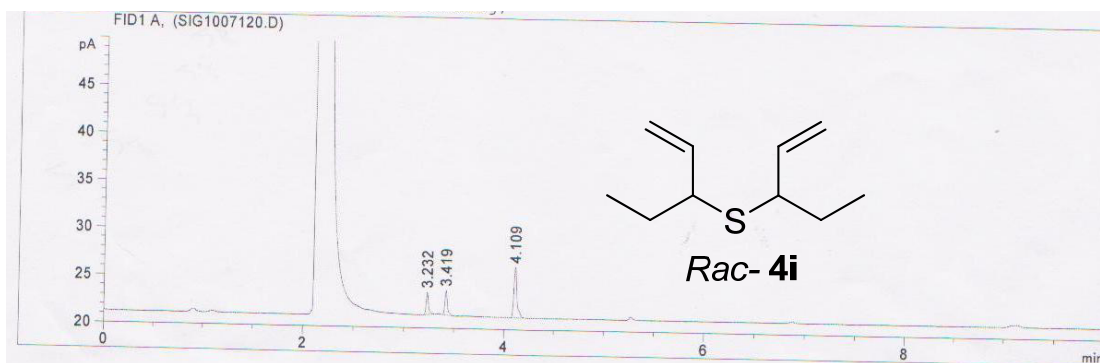

Signal 1: FID1 A,

| Peak # | RetTime [min] | Type | Width [min] | Area [pA*s] | Height [pA] | Area %   |
|--------|---------------|------|-------------|-------------|-------------|----------|
| 1      | 3.232         | BB   | 0.0258      | 3.97708     | 2.33805     | 19.66776 |
| 2      | 3.419         | BB   | 0.0269      | 4.57960     | 2.55253     | 22.64735 |
| 3      | 4.109         | BB   | 0.0328      | 11.66465    | 5.27358     | 57.68488 |

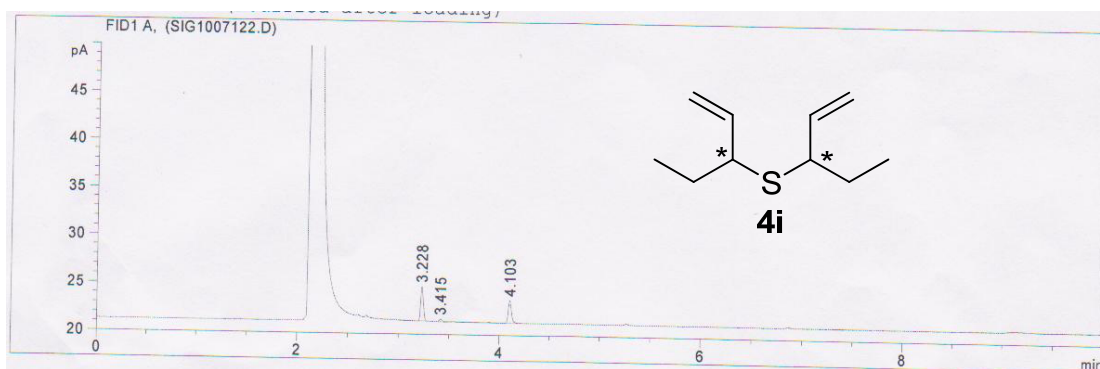

Signal 1: FID1 A,

| Peak # | RetTime [min] | Type | Width [min] | Area [pA*s] | Height [pA] | Area %   |
|--------|---------------|------|-------------|-------------|-------------|----------|
| 1      | 3.228         | BB   | 0.0284      | 6.49595     | 3.53871     | 53.63368 |
| 2      | 3.415         | BB   | 0.0308      | 5.16381e-1  | 2.53605e-1  | 4.26349  |
| 3      | 4.103         | BB   | 0.0336      | 5.09937     | 2.32008     | 42.10283 |

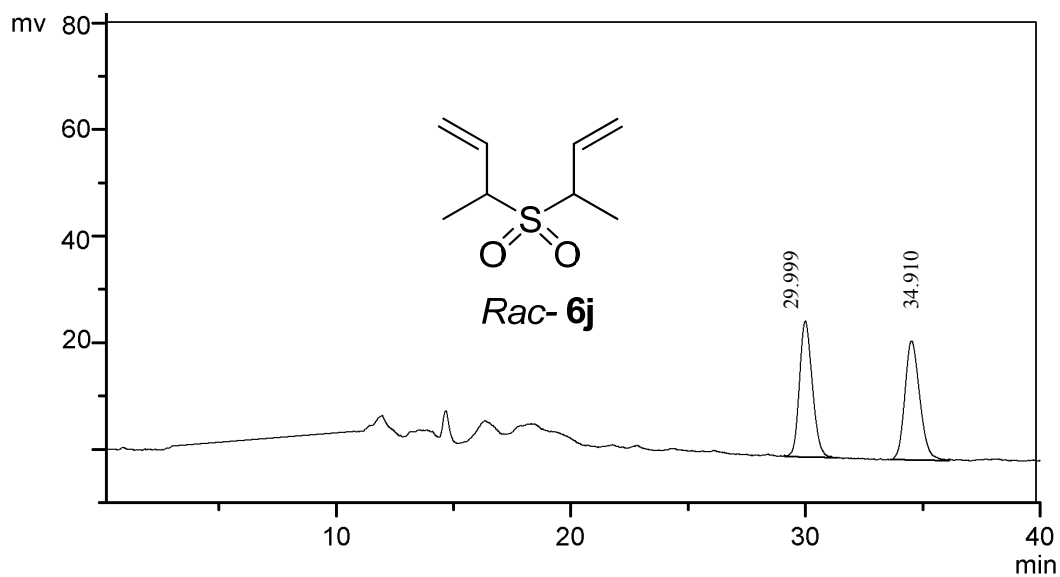

| Peak# | R.Time | I.Time | F.Time | Area   | Height | Area (%) |
|-------|--------|--------|--------|--------|--------|----------|
| 1     | 29.999 | 29.150 | 31.317 | 982440 | 25591  | 49.8045  |
| 2     | 34.516 | 33.658 | 36.233 | 990152 | 22325  | 50.1955  |

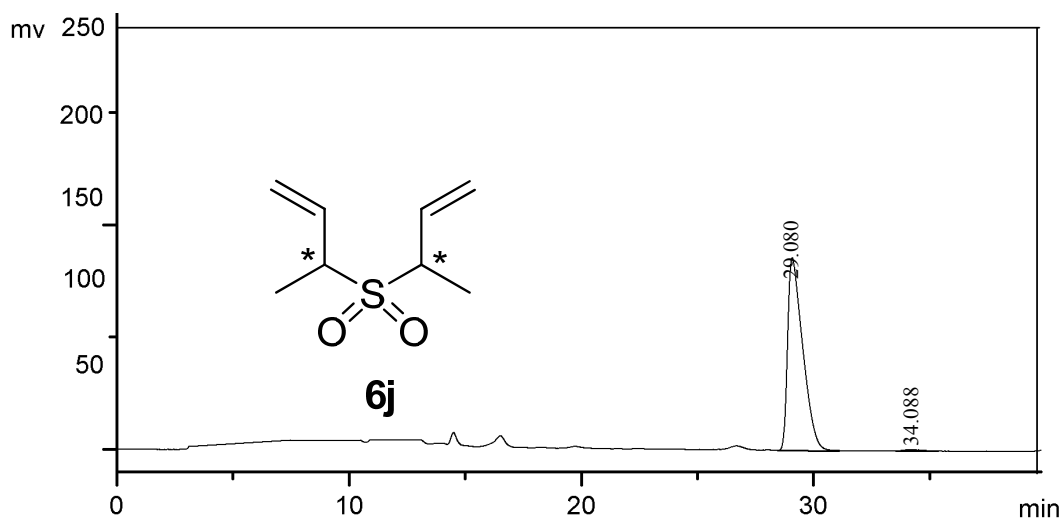

| Peak# | R.Time | I.Time | F.Time | Area    | Height | Area (%) |
|-------|--------|--------|--------|---------|--------|----------|
| 1     | 29.080 | 28.500 | 31.000 | 7754165 | 171530 | 99.2779  |
| 2     | 34.088 | 33.433 | 35.250 | 56403   | 1037   | 0.7221   |



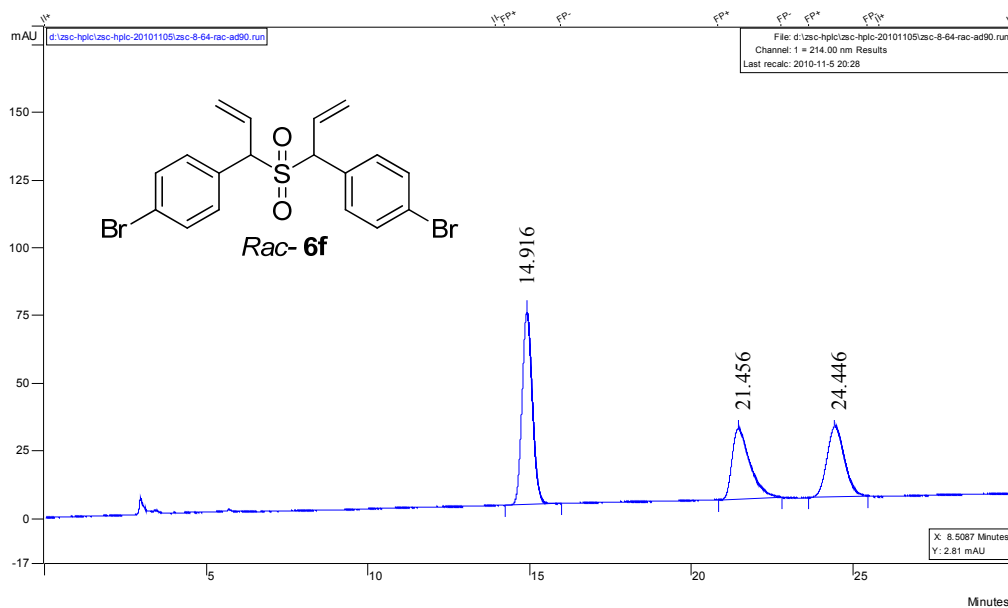

Run Mode: Analysis Peak Measurement: Area Calc. Type: % Normalize Results: No

| Peak No. | Name | tR (min) | Result | Sep. Code | W 1/2 (sec) | Efficiency Plates | Plates/m | k'    | R   | Tailing (5.0%) |
|----------|------|----------|--------|-----------|-------------|-------------------|----------|-------|-----|----------------|
| 1        |      | 14.916   | 43.922 | BB        | 20.35       | 10722             | 71481    | 13.92 |     | 1.10           |
| 2        |      | 21.456   | 28.242 | BB        | 34.90       | 7545              | 50297    | 20.46 | 8.4 | 1.75           |
| 3        |      | 24.446   | 27.836 | BB        | 35.40       | 9518              | 63456    | 23.45 | 3.0 | 1.14           |

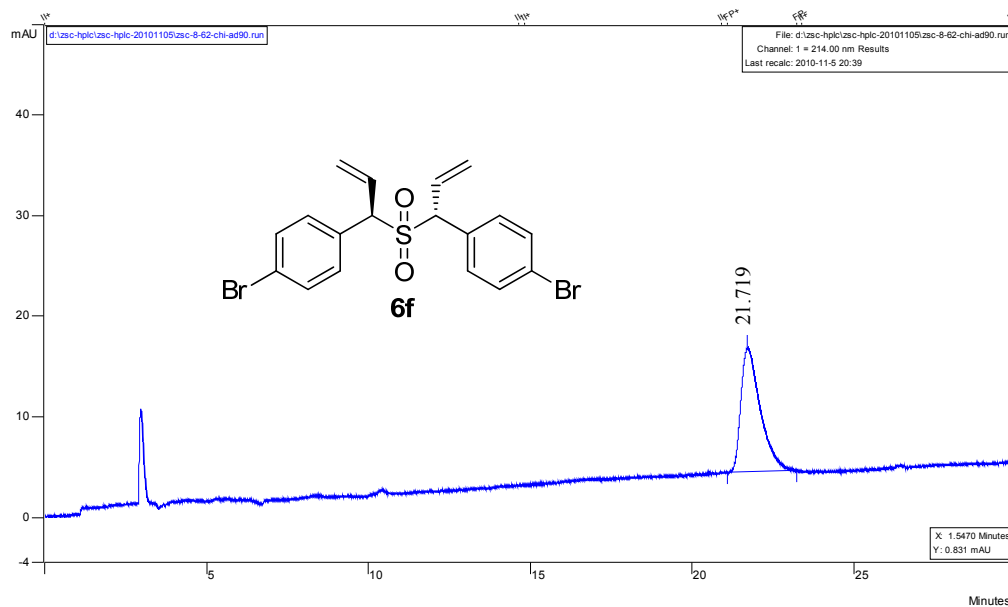

Run Mode: Analysis Peak Measurement: Area Calc. Type: % Normalize Results: No

| Peak No. | Name | tR (min) | Result  | Sep. Code | W 1/2 (sec) | Efficiency Plates | Plates/m | k'    | R | Tailing (5.0%) |
|----------|------|----------|---------|-----------|-------------|-------------------|----------|-------|---|----------------|
| 1        |      | 21.719   | 100.000 | BB        | 37.60       | 6660              | 44398    | 20.72 |   | 1.67           |

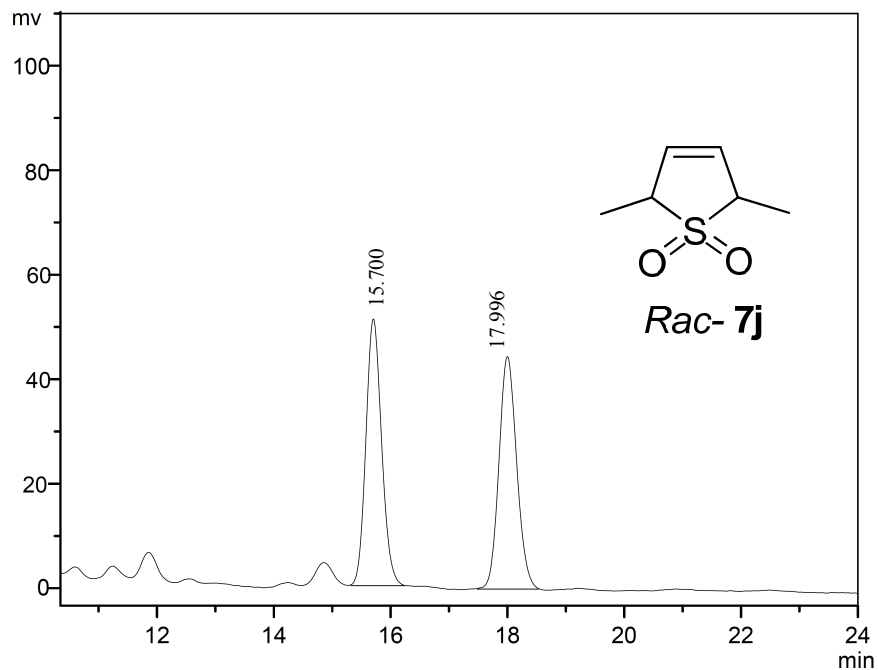

| Peak# | R.Time | I.Time | F.Time | Area    | Height | A/H     | Area (%) |
|-------|--------|--------|--------|---------|--------|---------|----------|
| 1     | 15.700 | 15.267 | 16.308 | 1437071 | 76599  | 18.7610 | 50.0857  |
| 2     | 17.996 | 17.258 | 18.650 | 1432152 | 67038  | 21.3630 | 49.9143  |

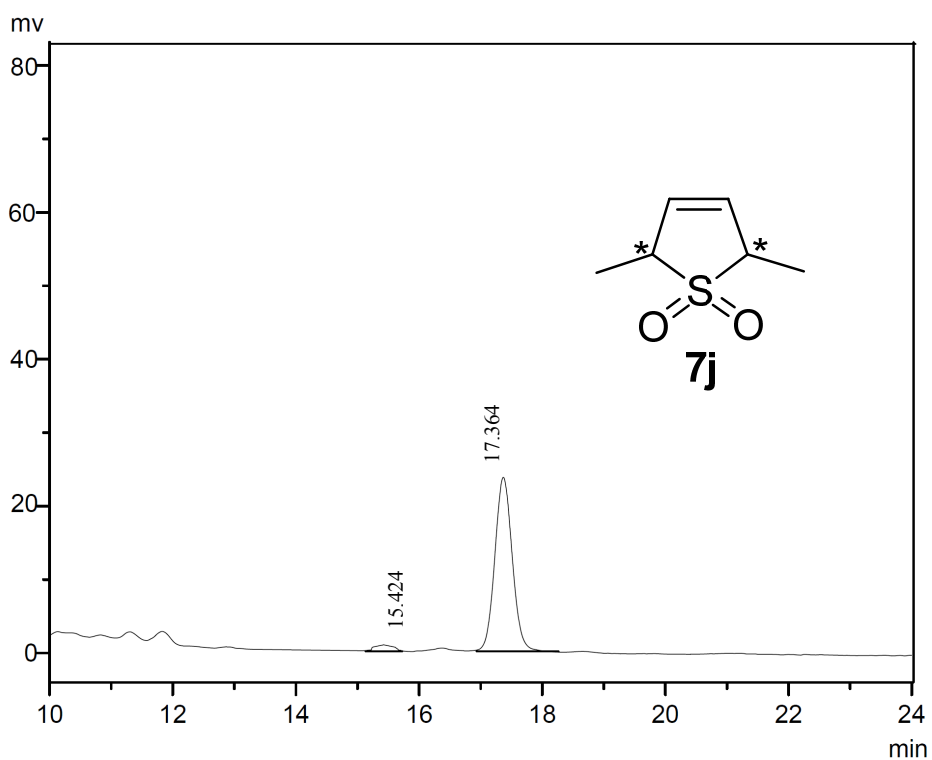

| Peak# | R.Time | I.Time | F.Time | Area    | Height | A/H     | Area (%) |
|-------|--------|--------|--------|---------|--------|---------|----------|
| 1     | 15.424 | 15.183 | 15.592 | 39404   | 2927   | 13.4610 | 3.2417   |
| 2     | 17.364 | 16.850 | 18.142 | 1176160 | 59300  | 19.8340 | 96.7583  |

### NMR Spectra of the compounds 4, 5, 6 and 7.

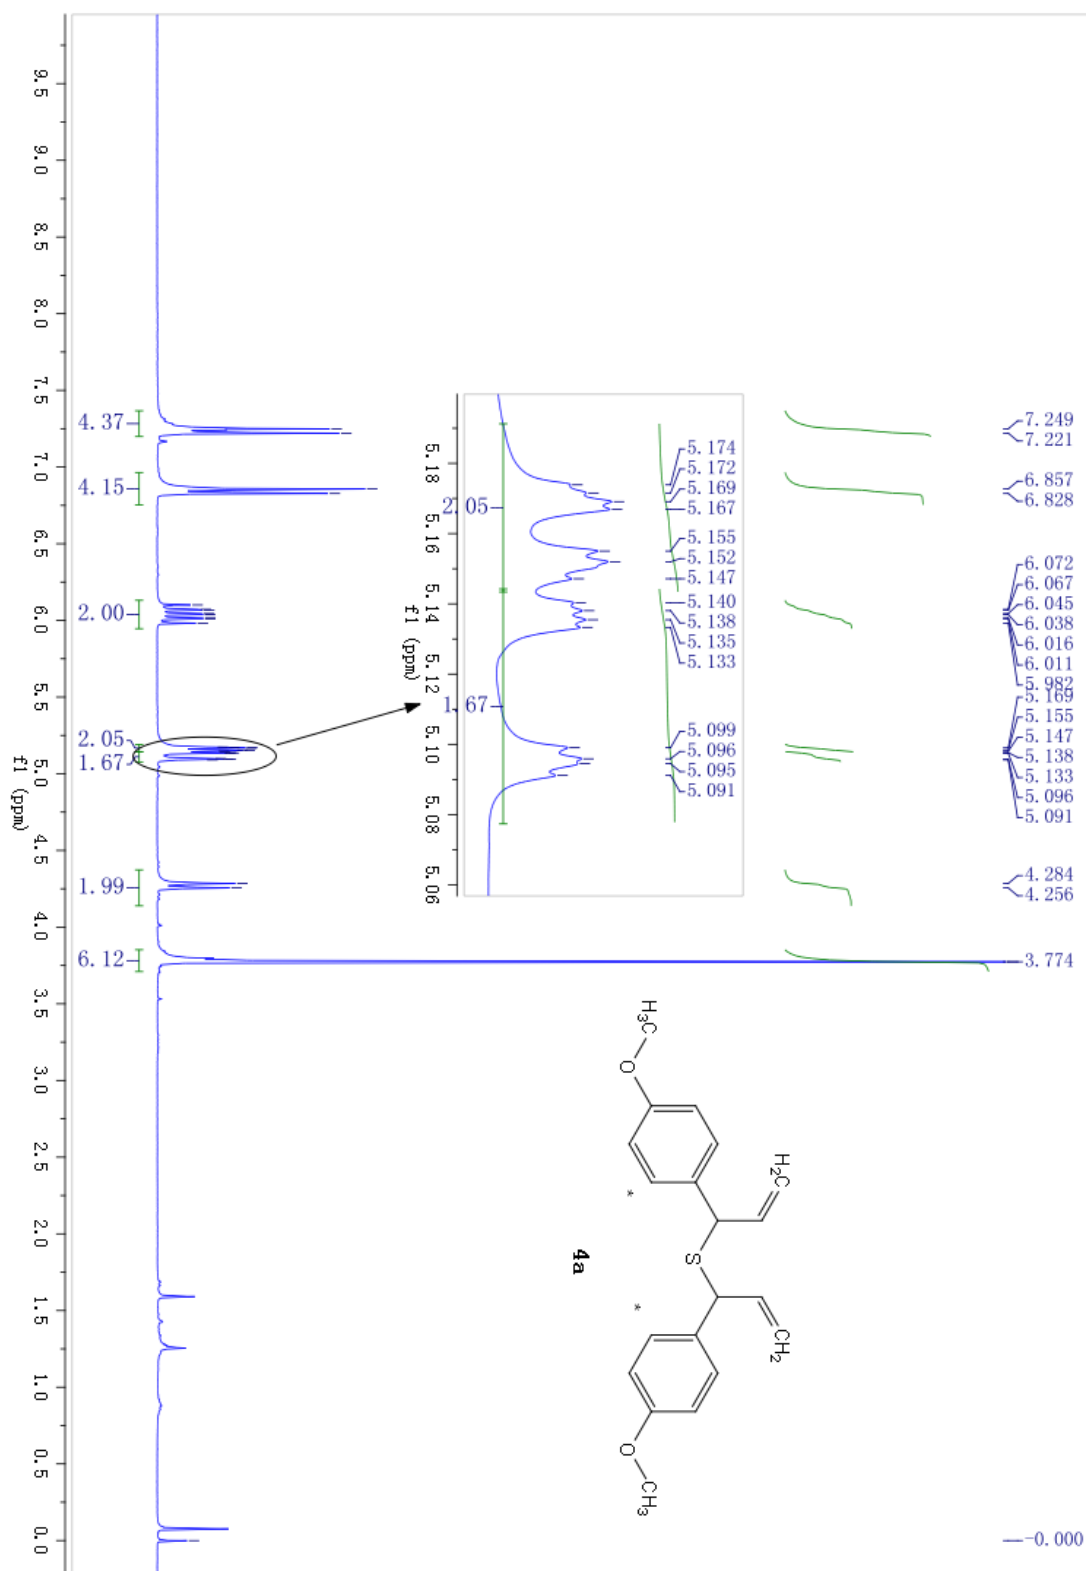

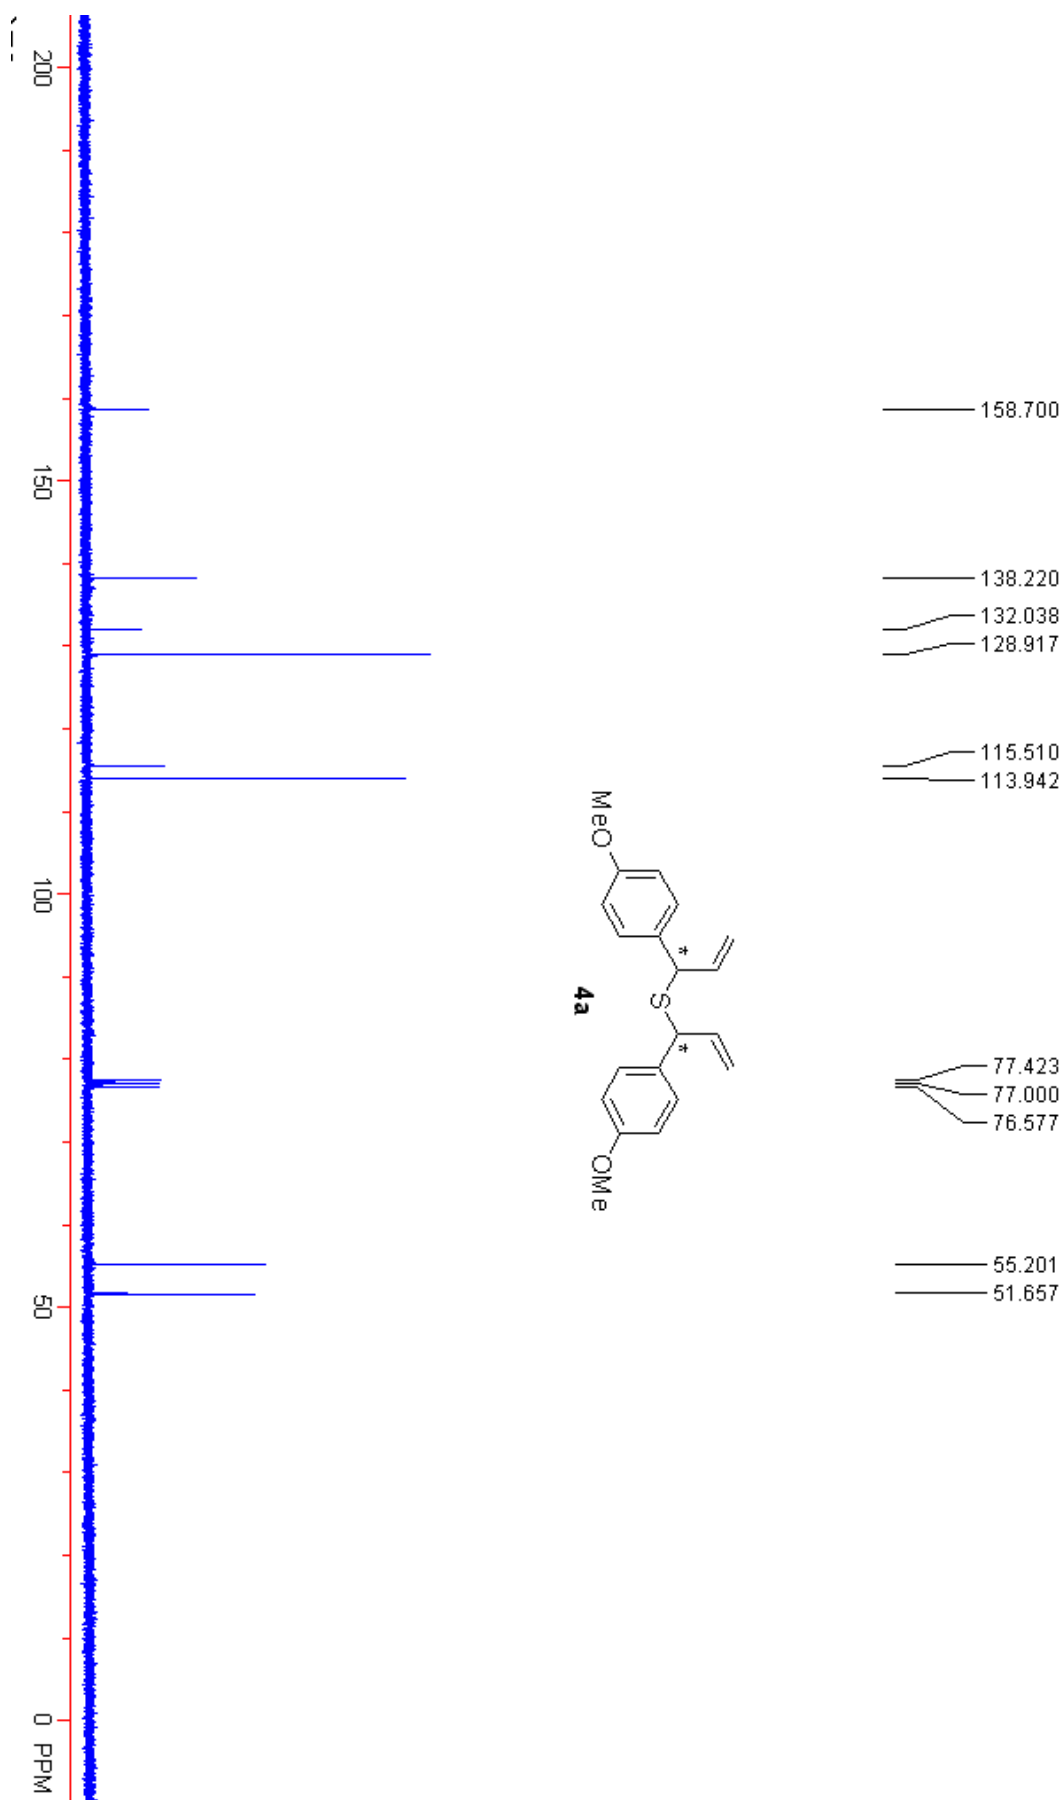

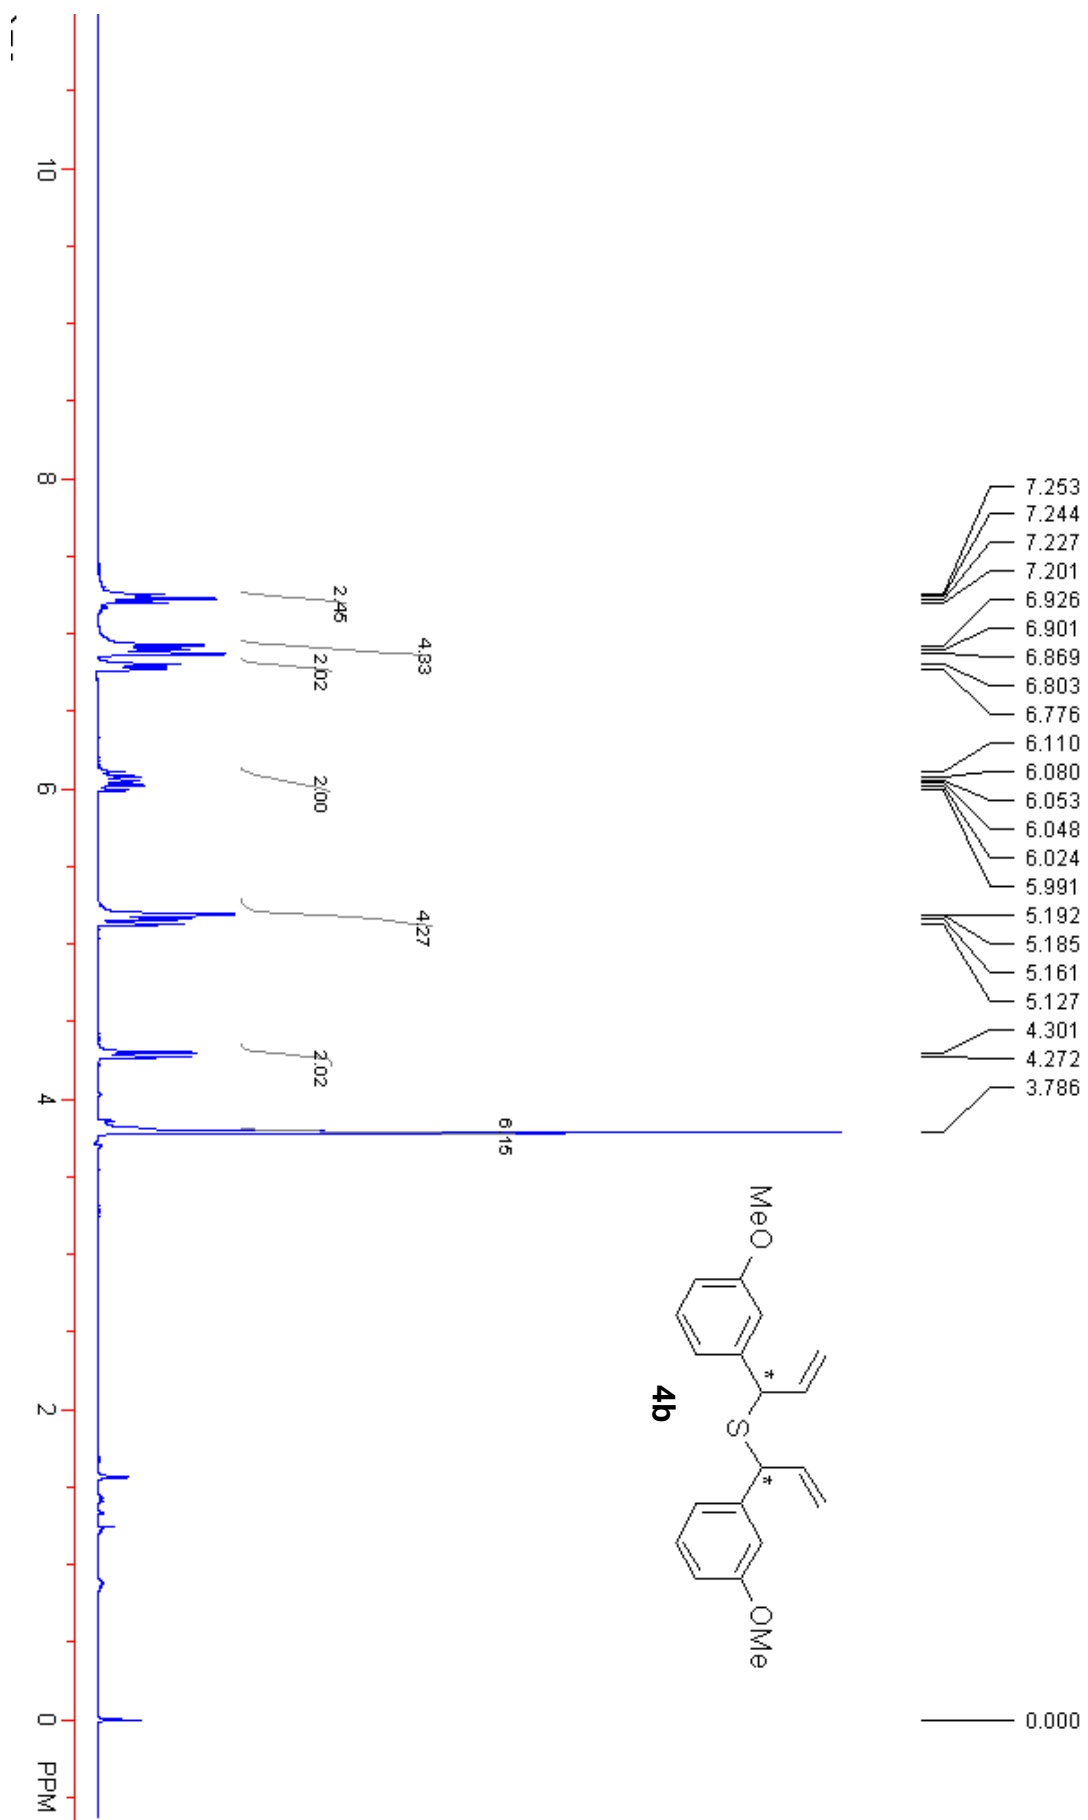

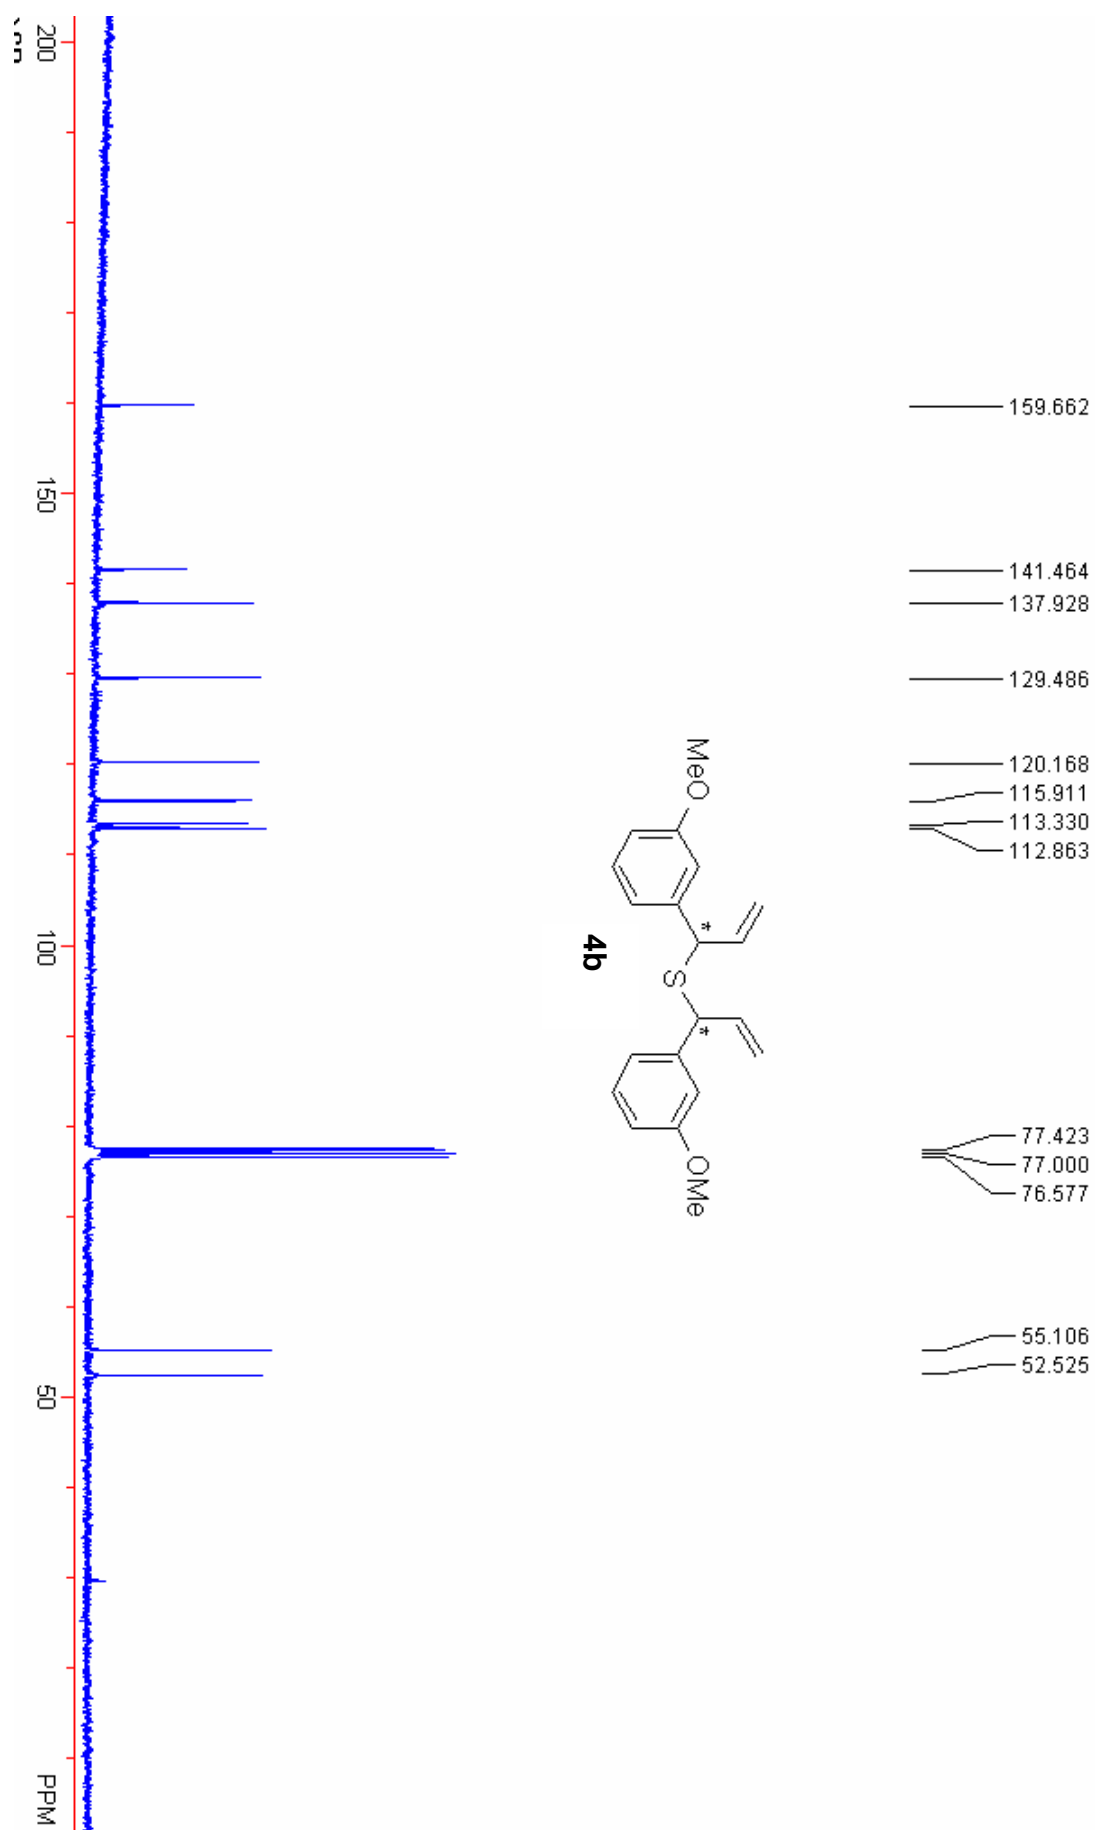

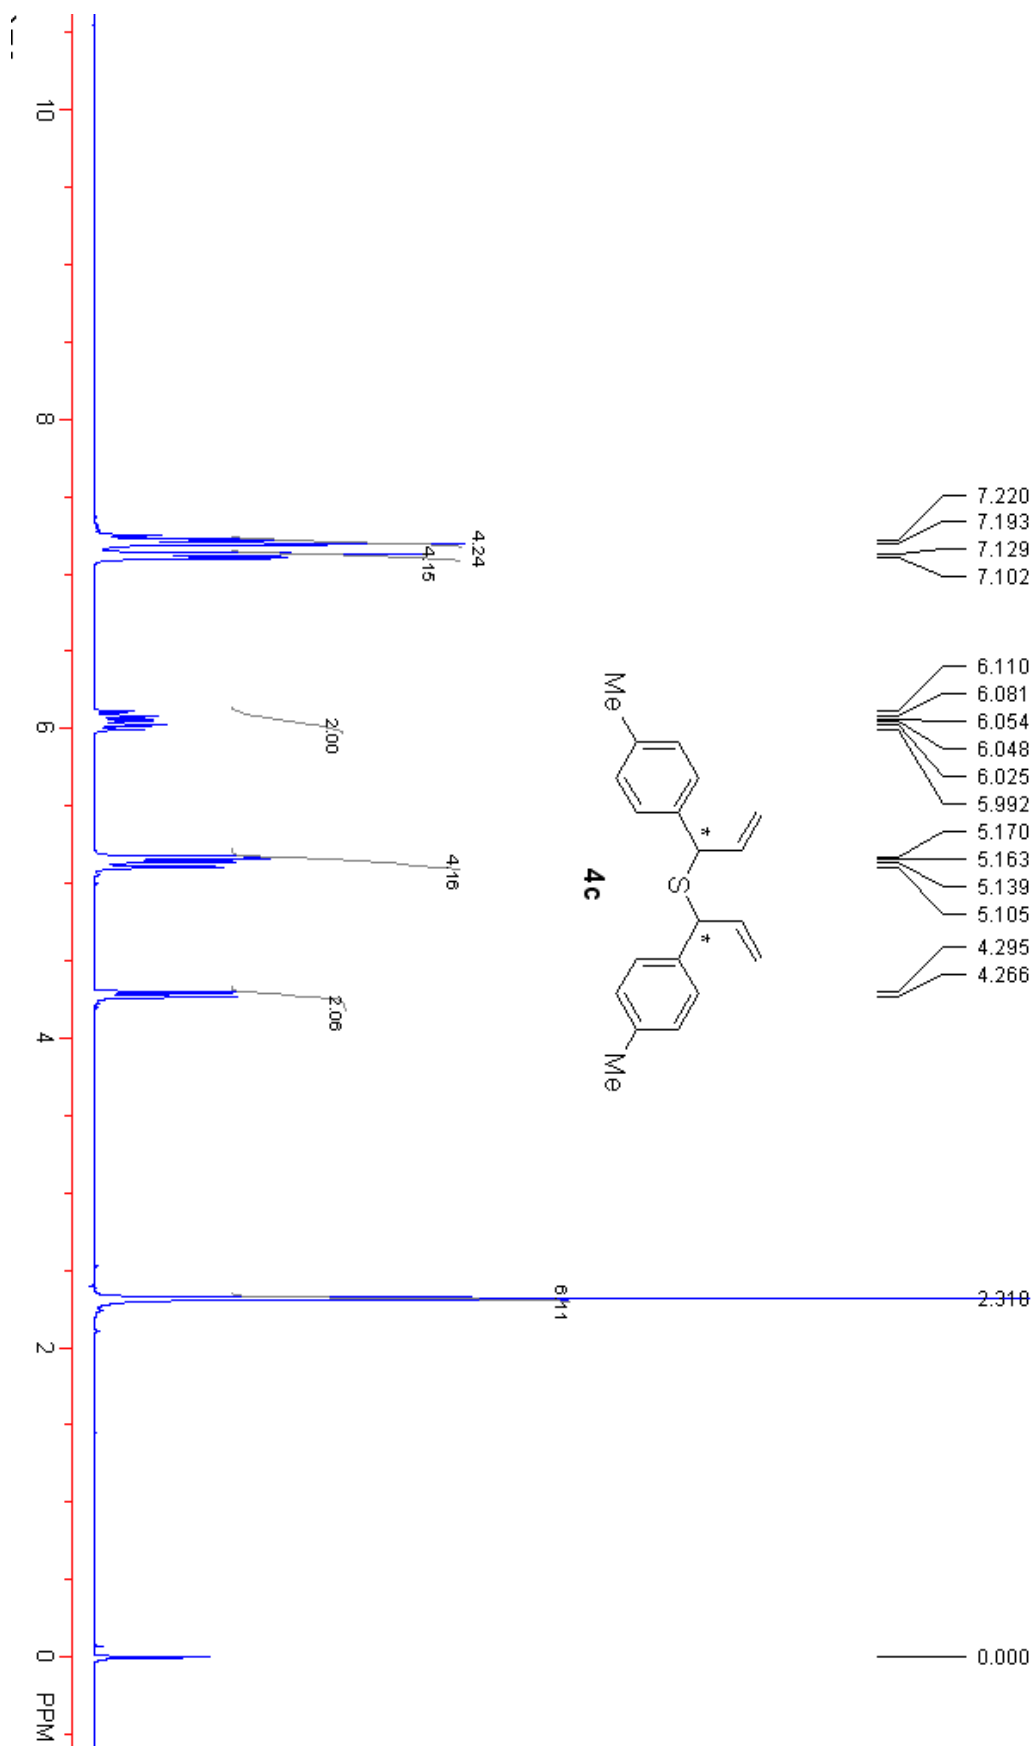

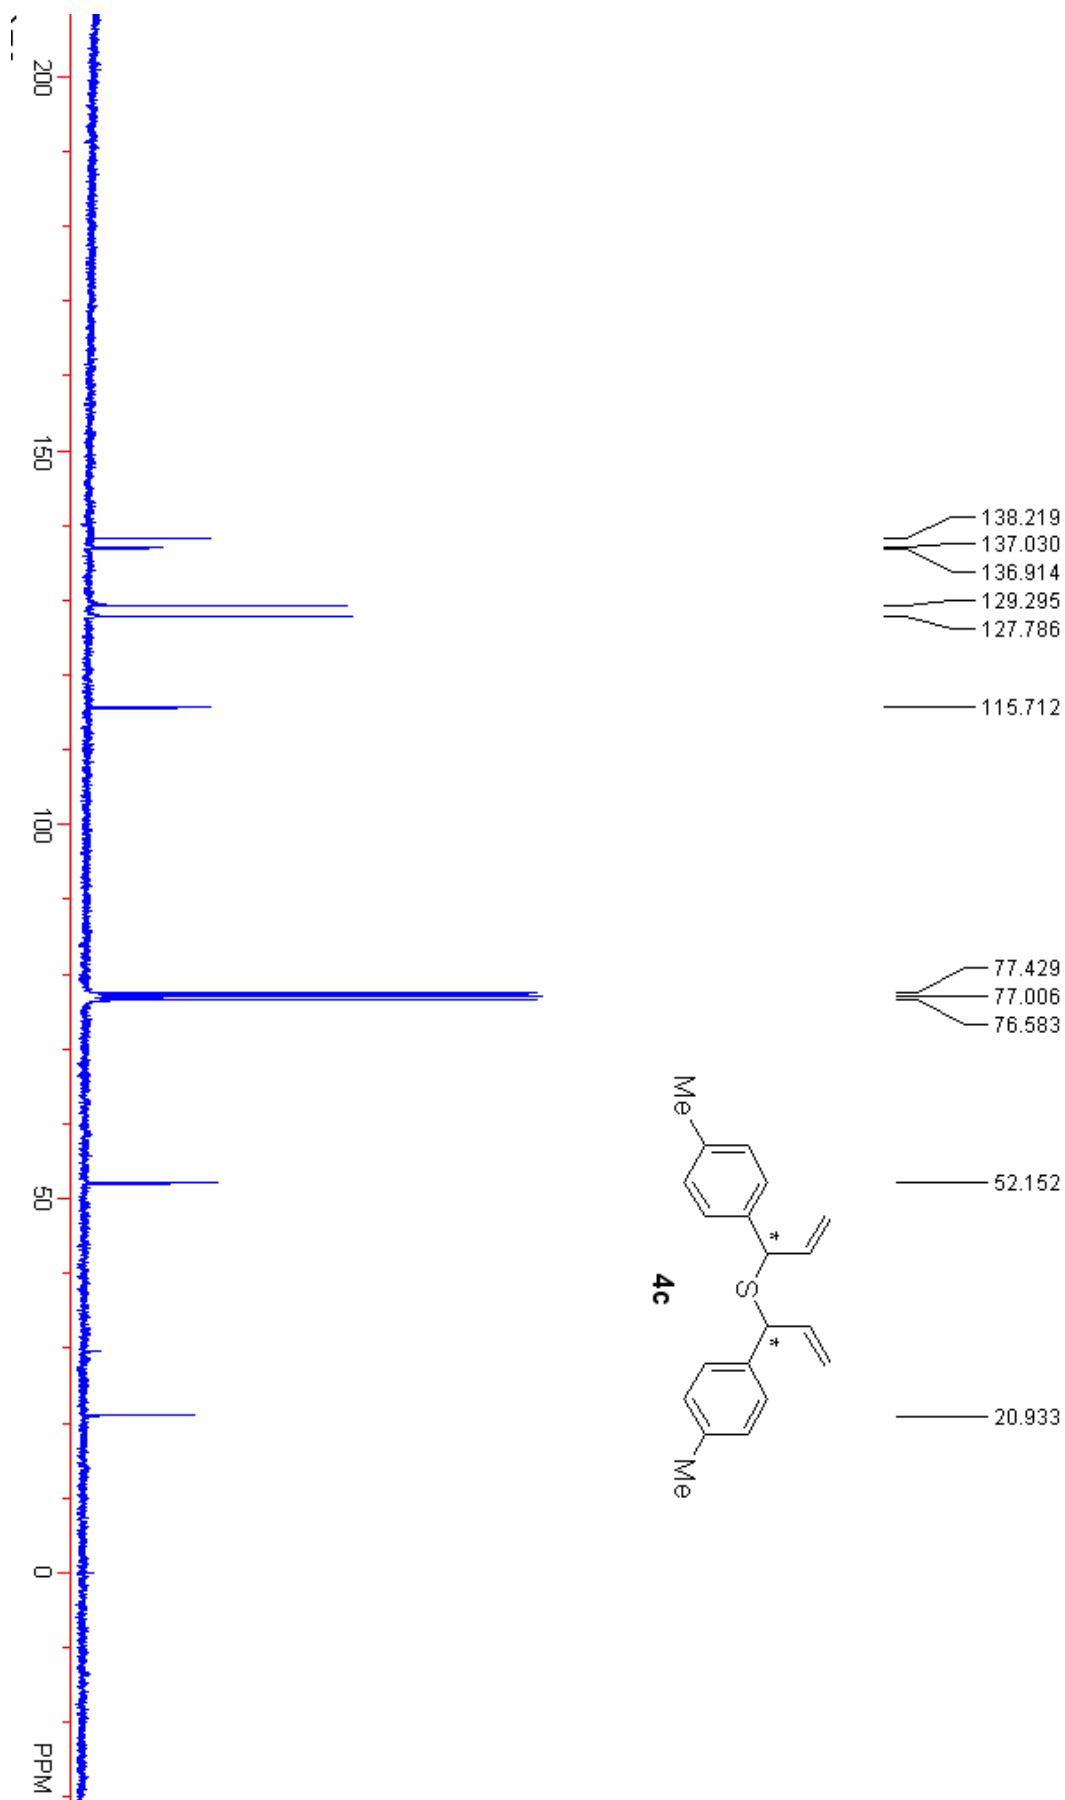



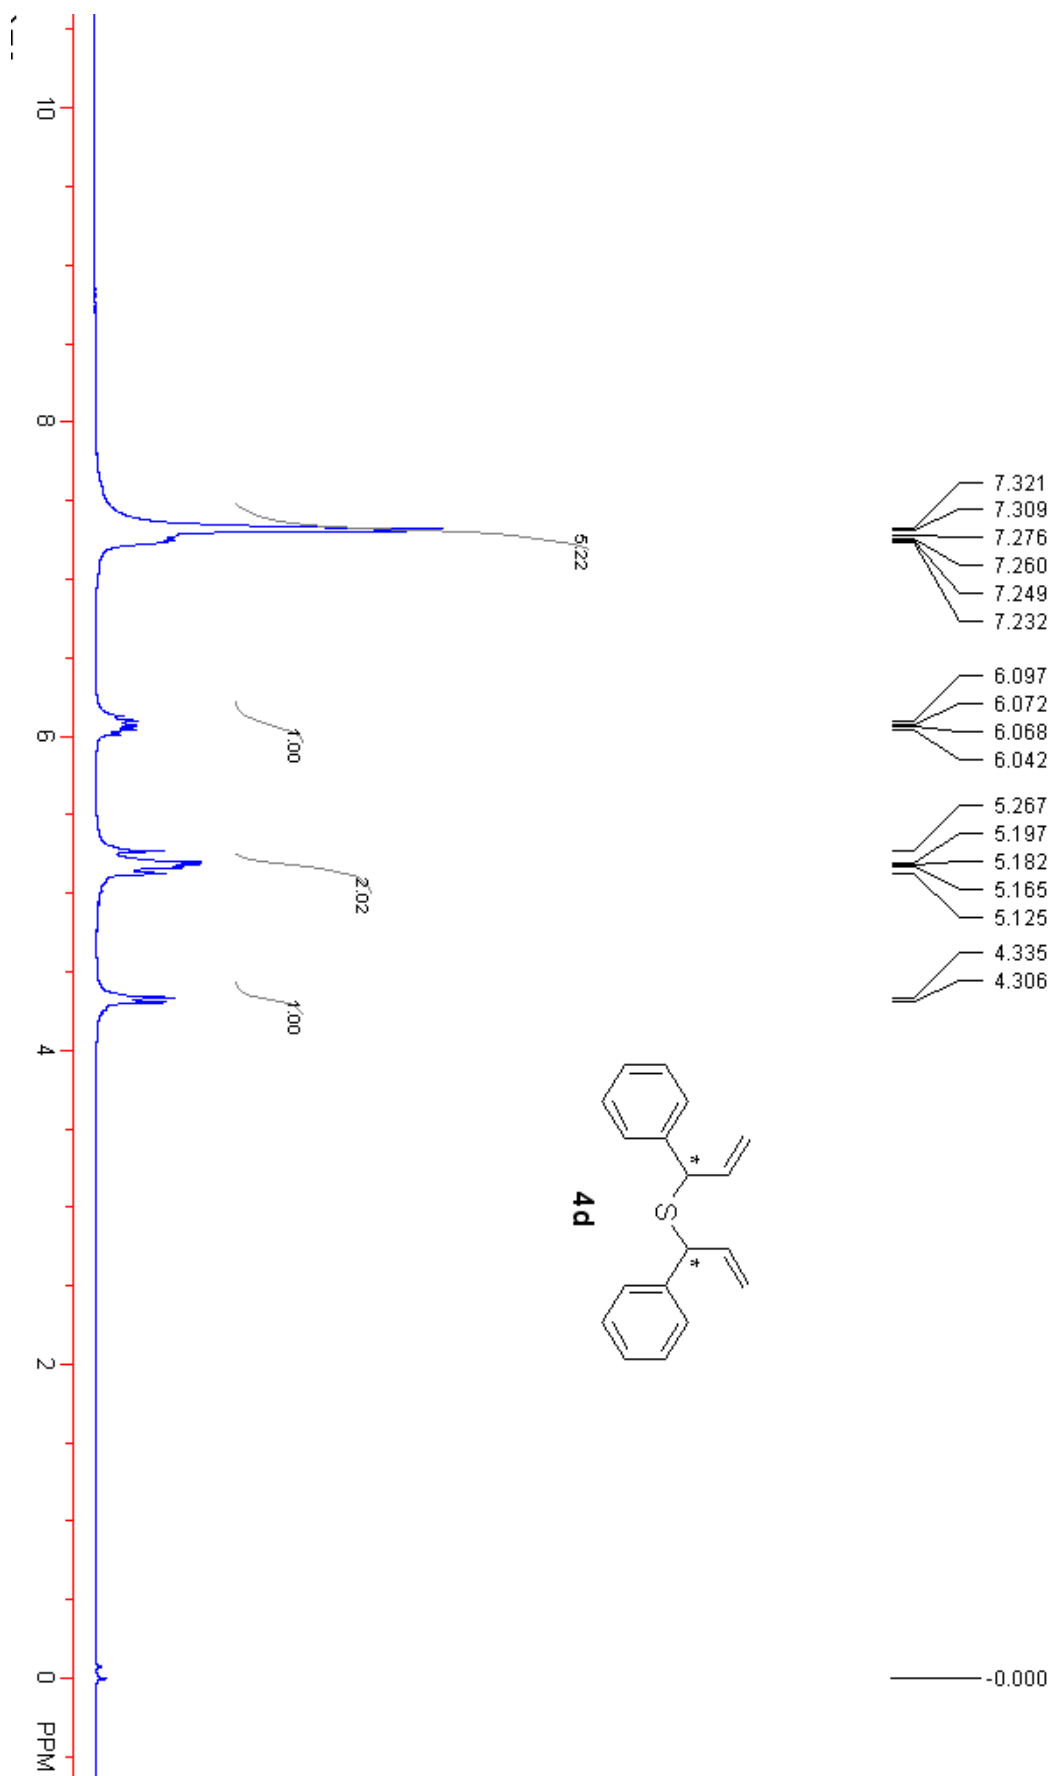

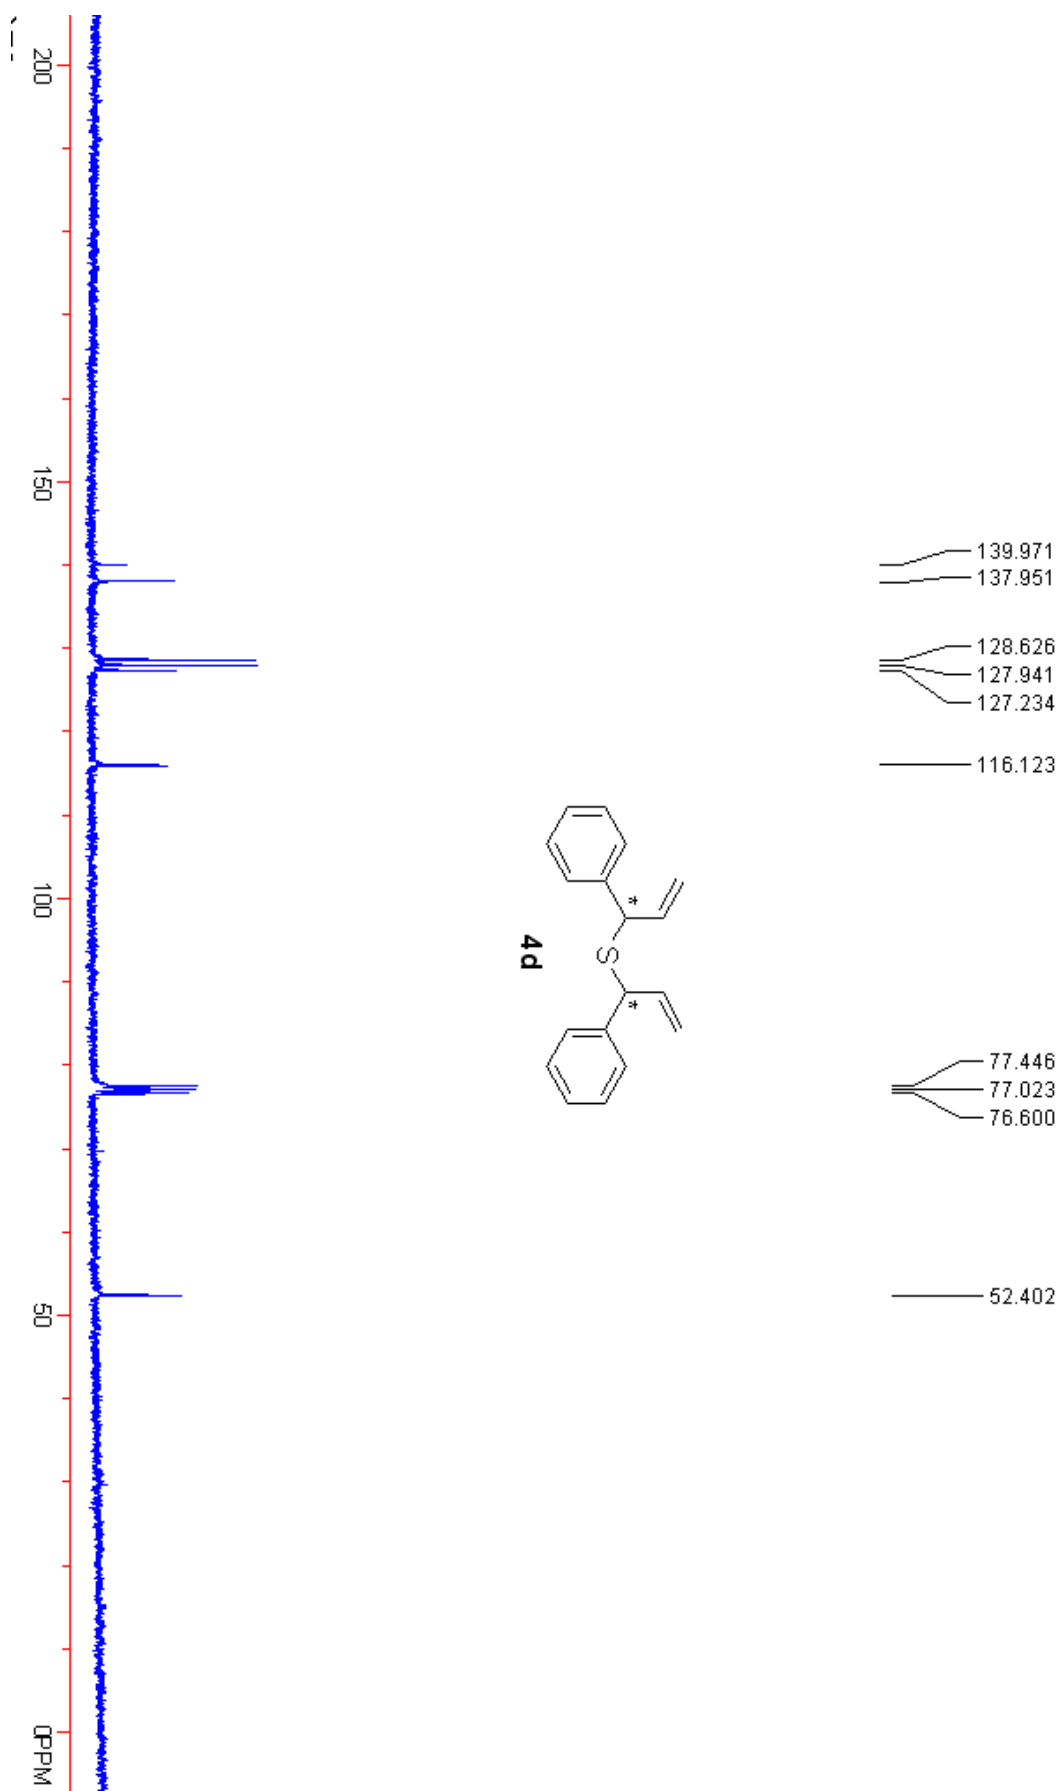

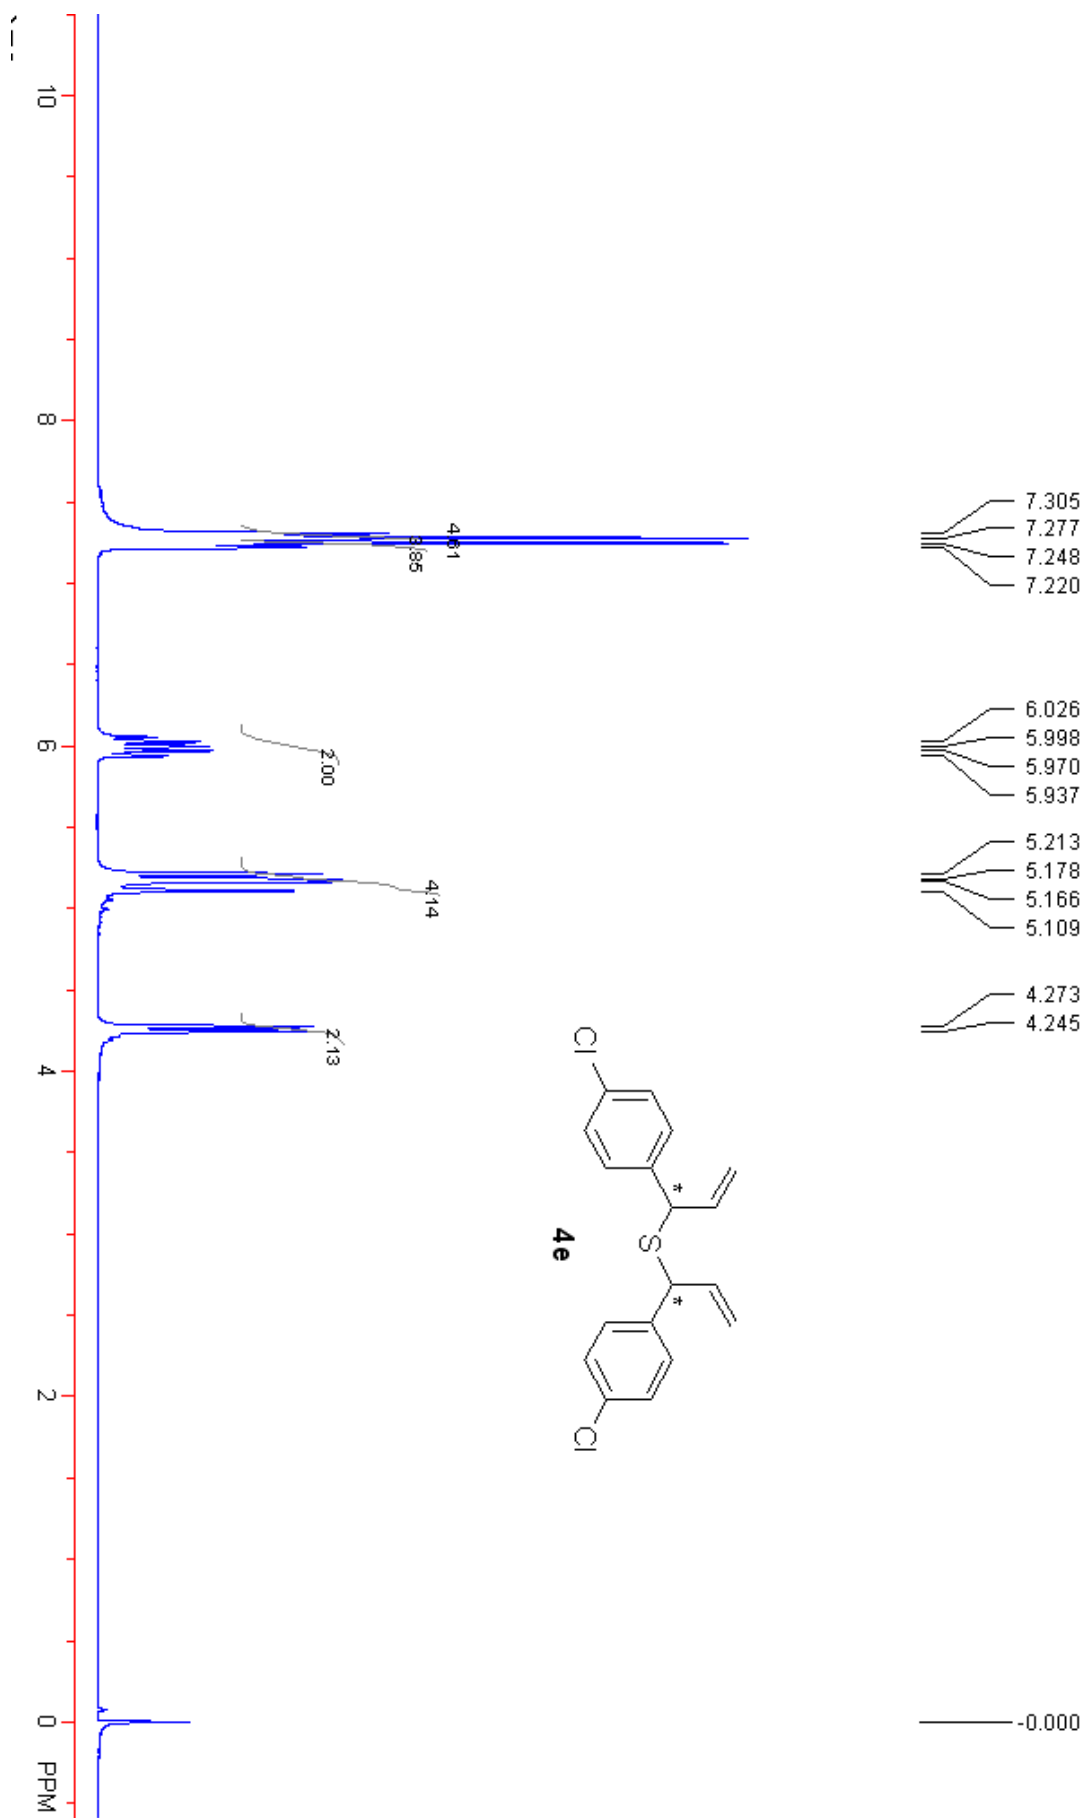

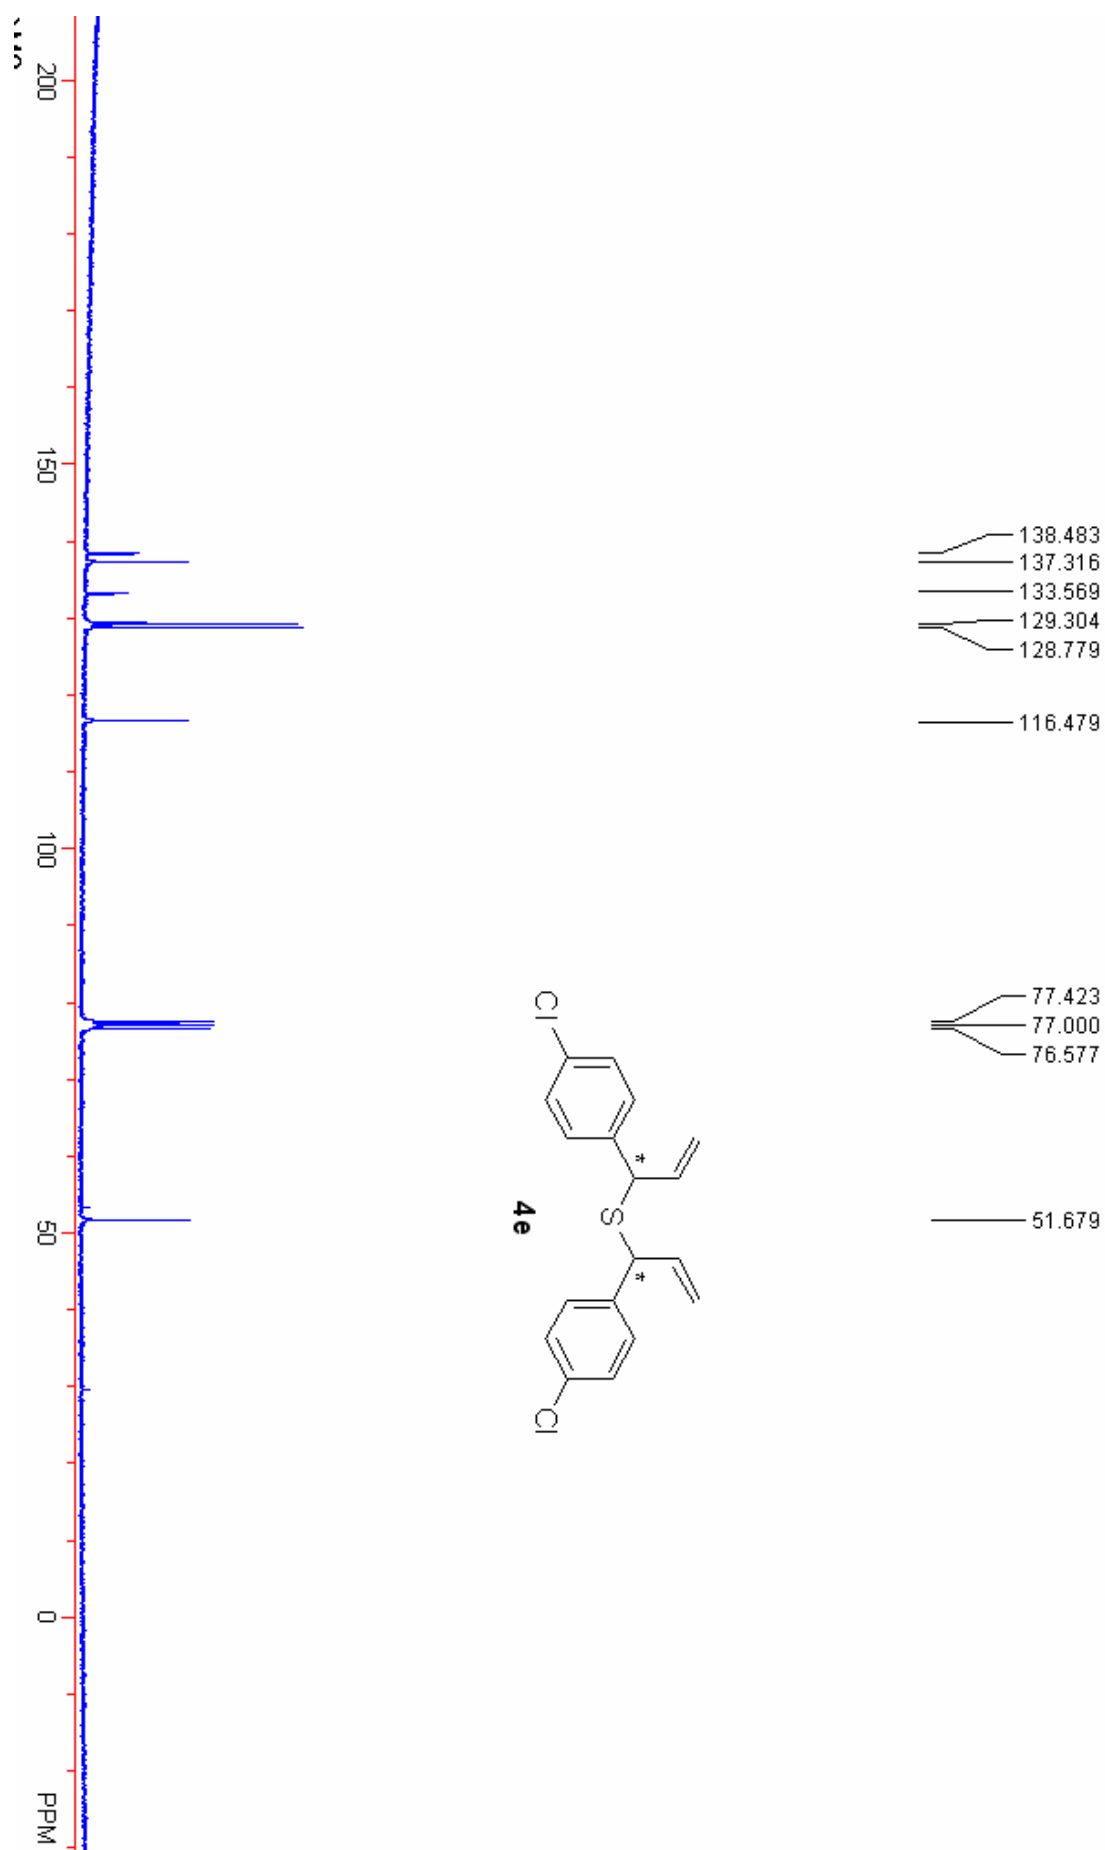

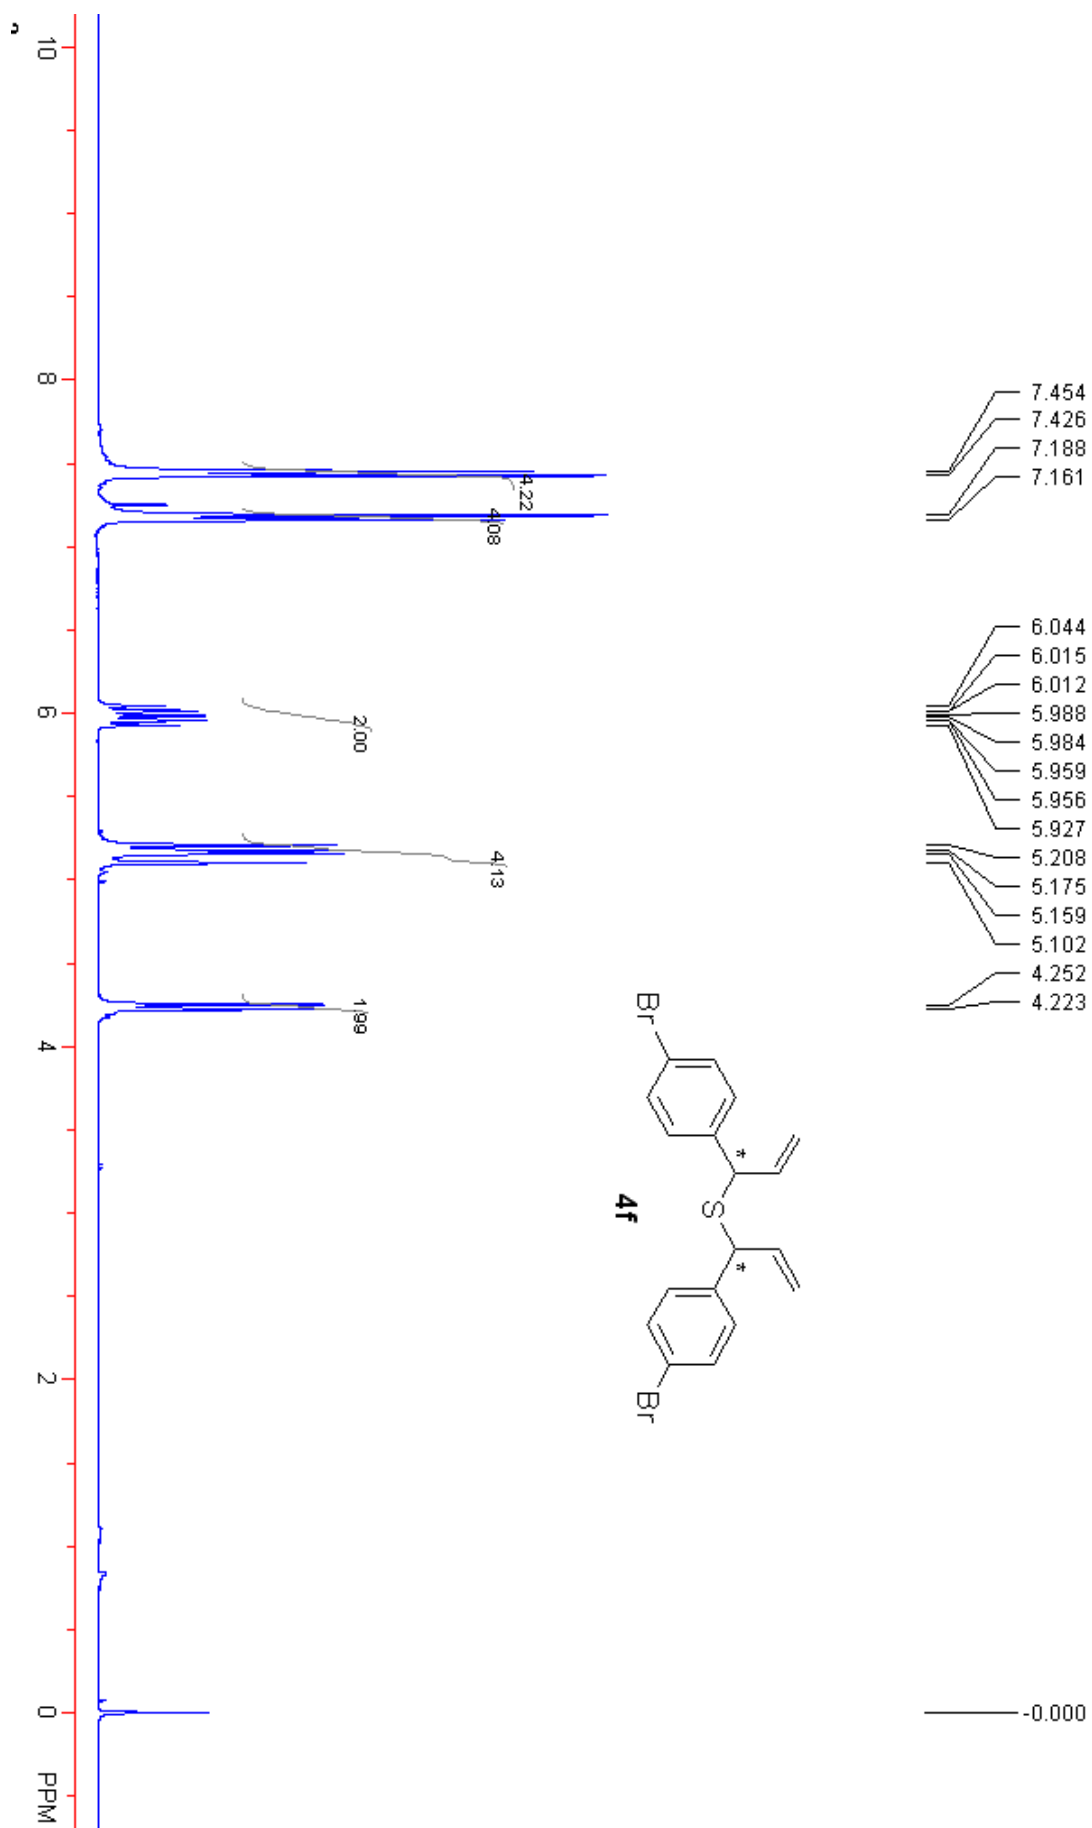

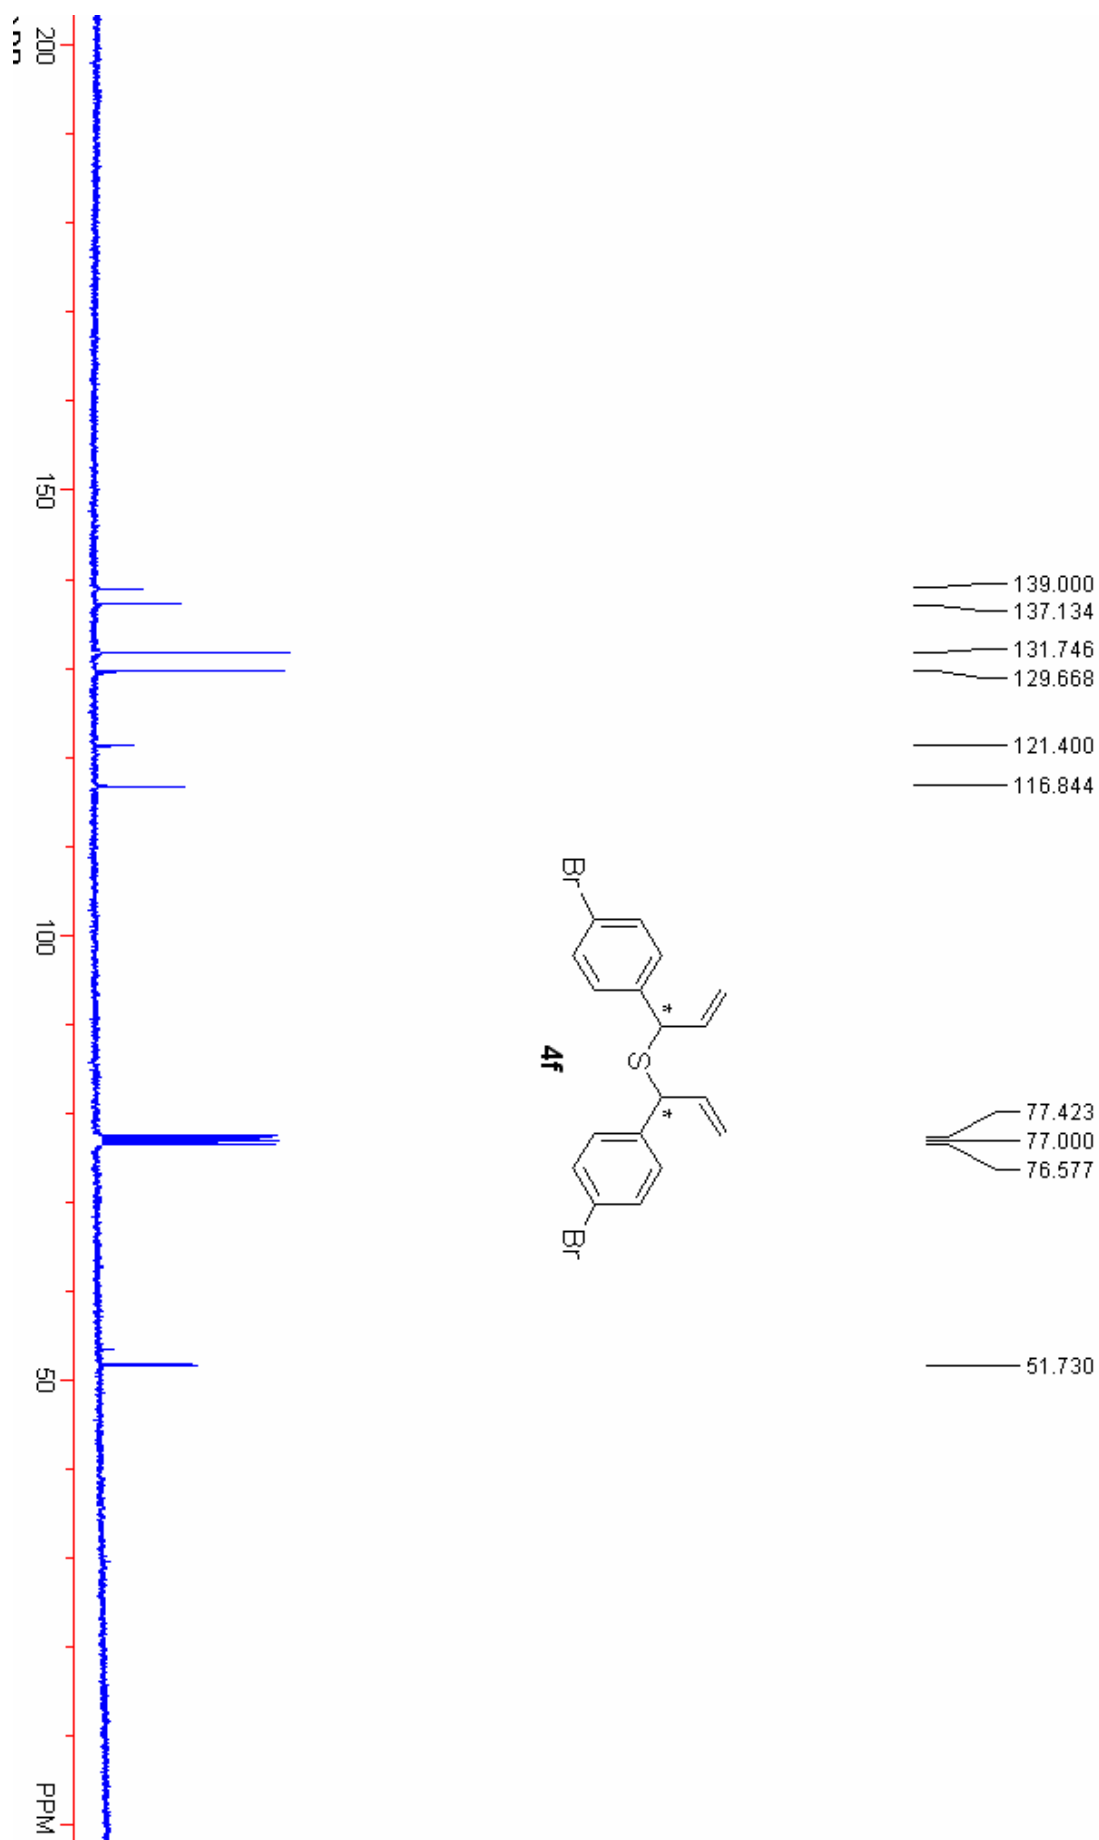

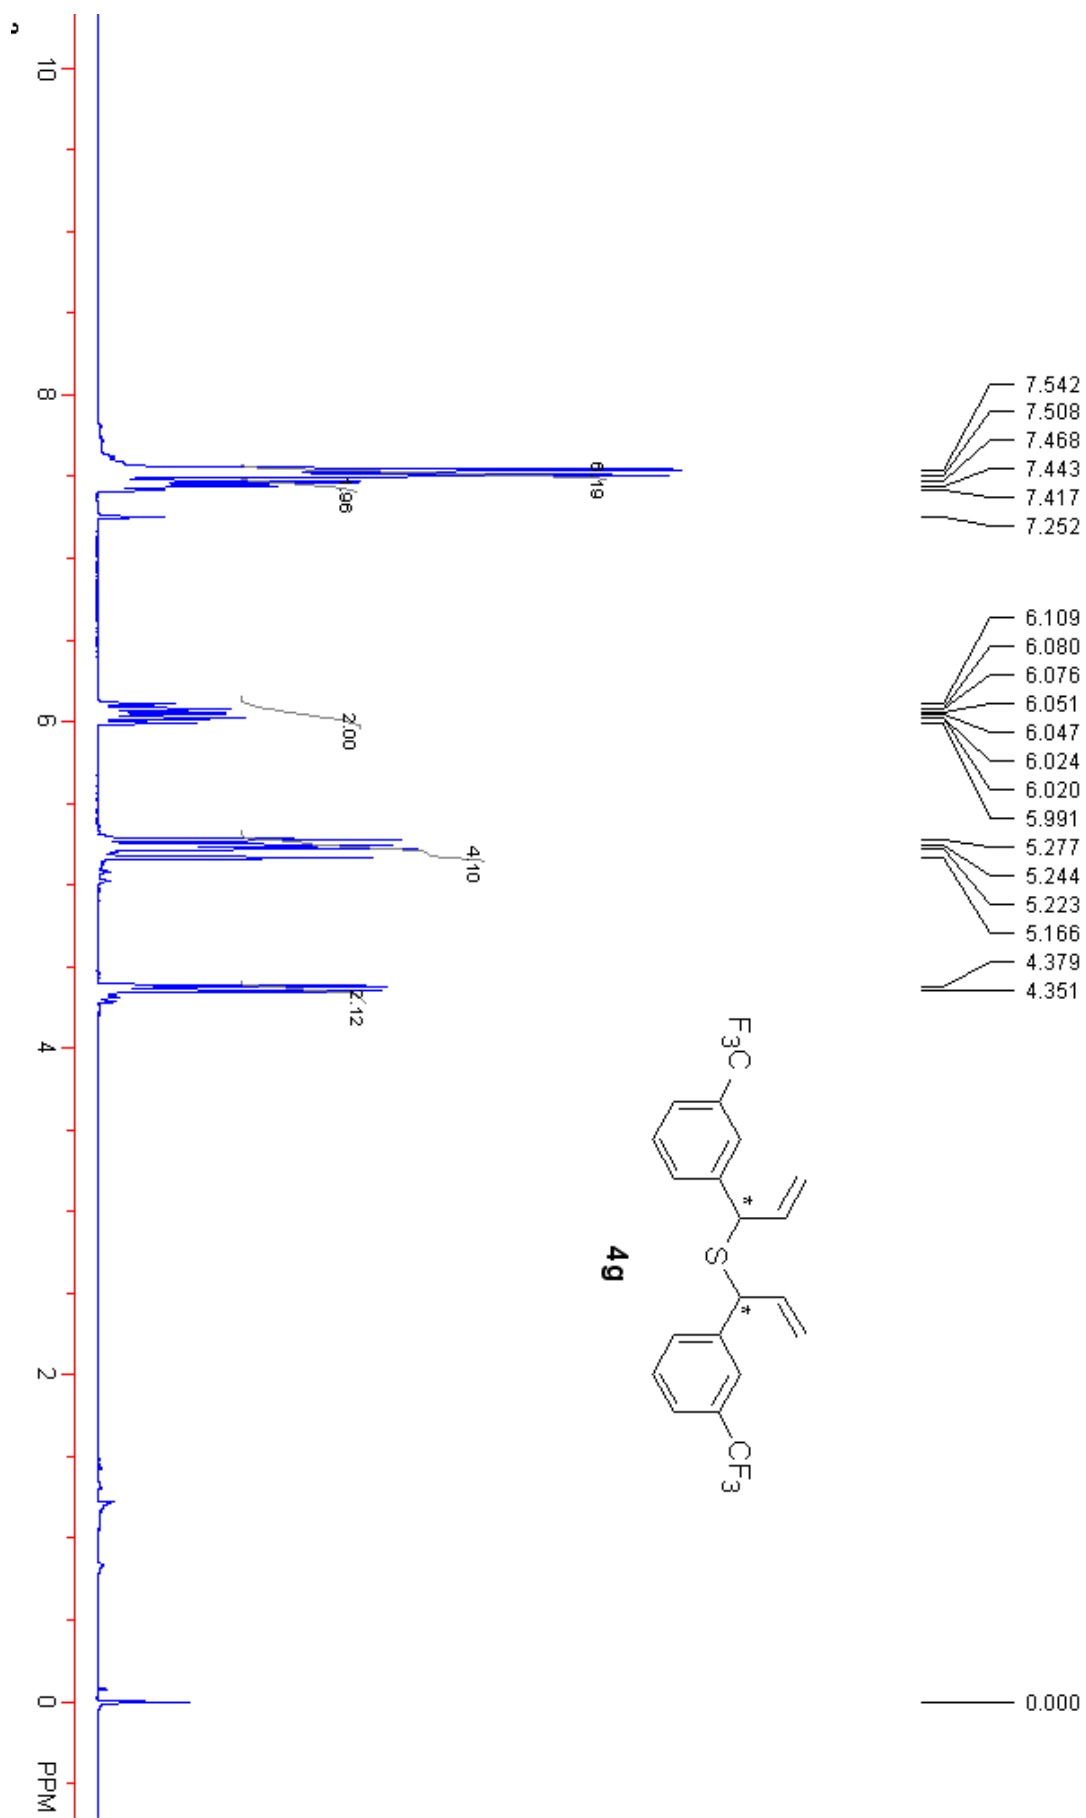

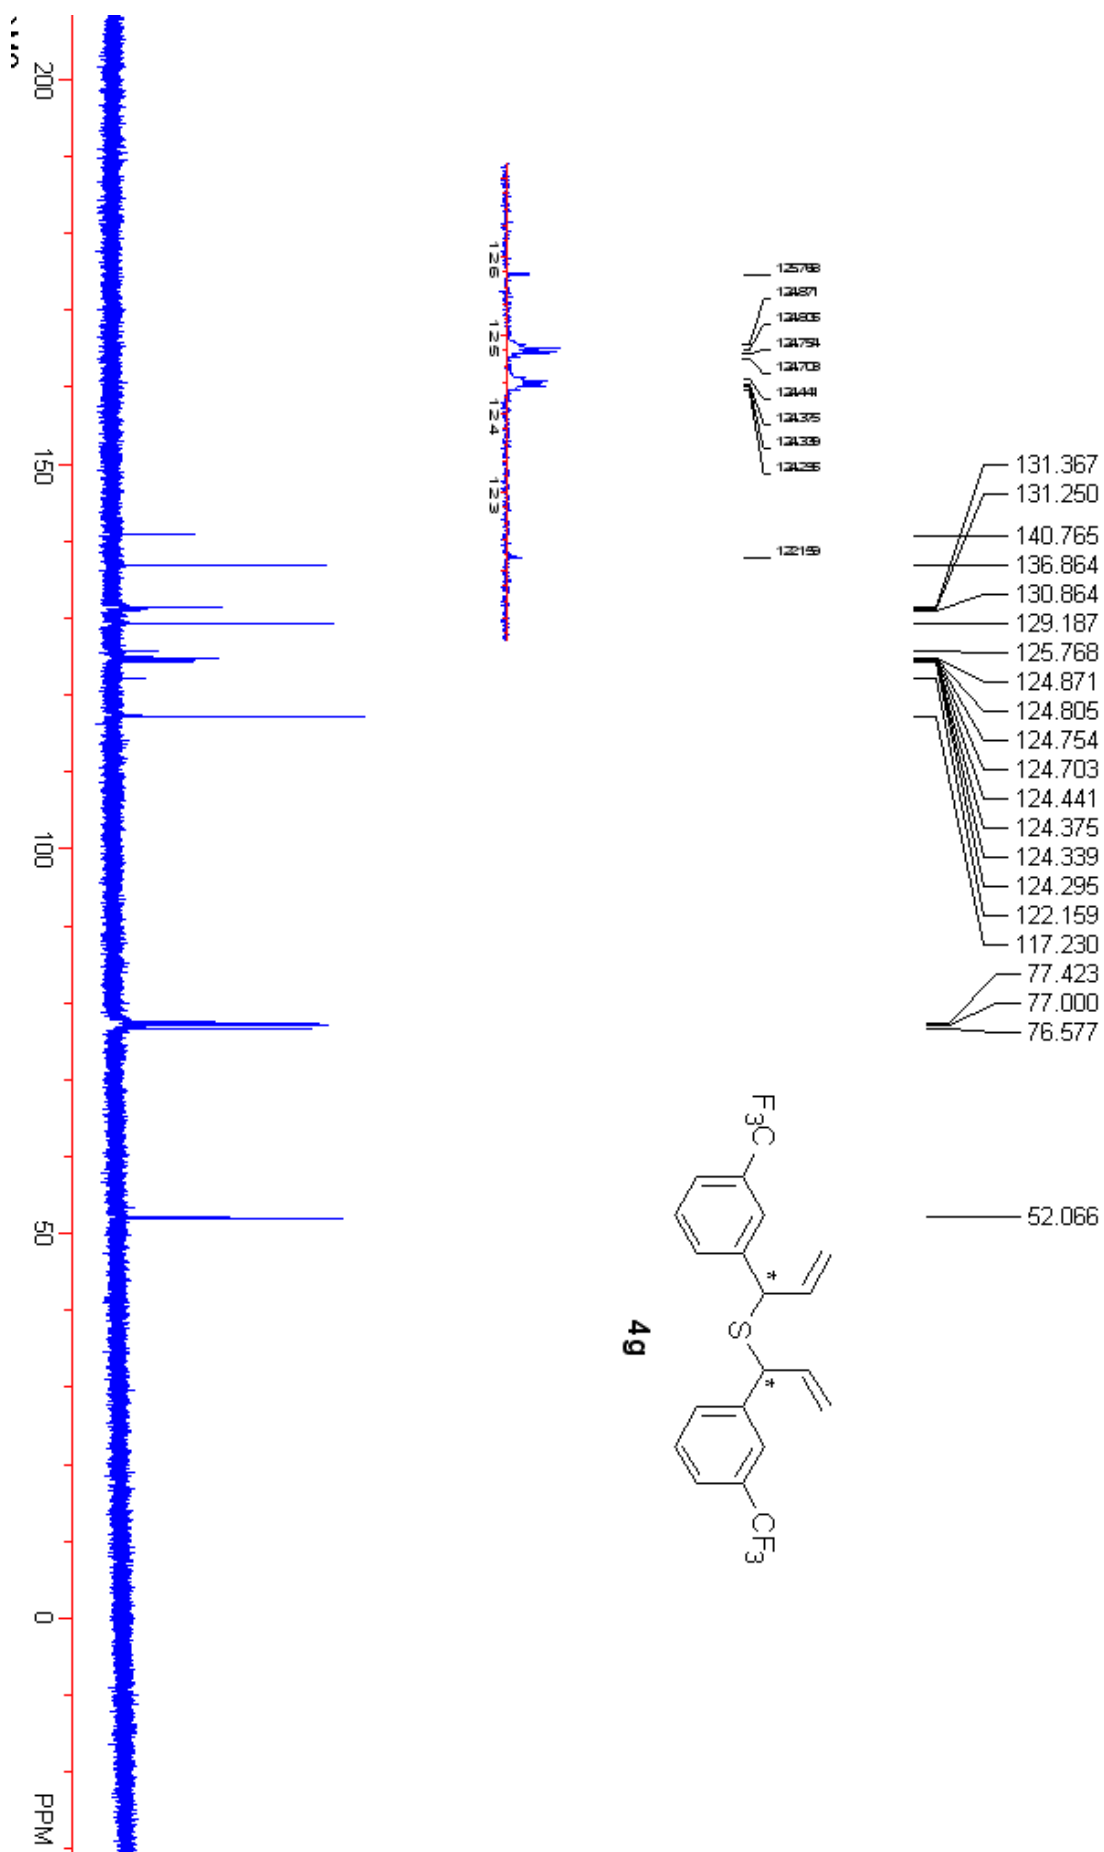



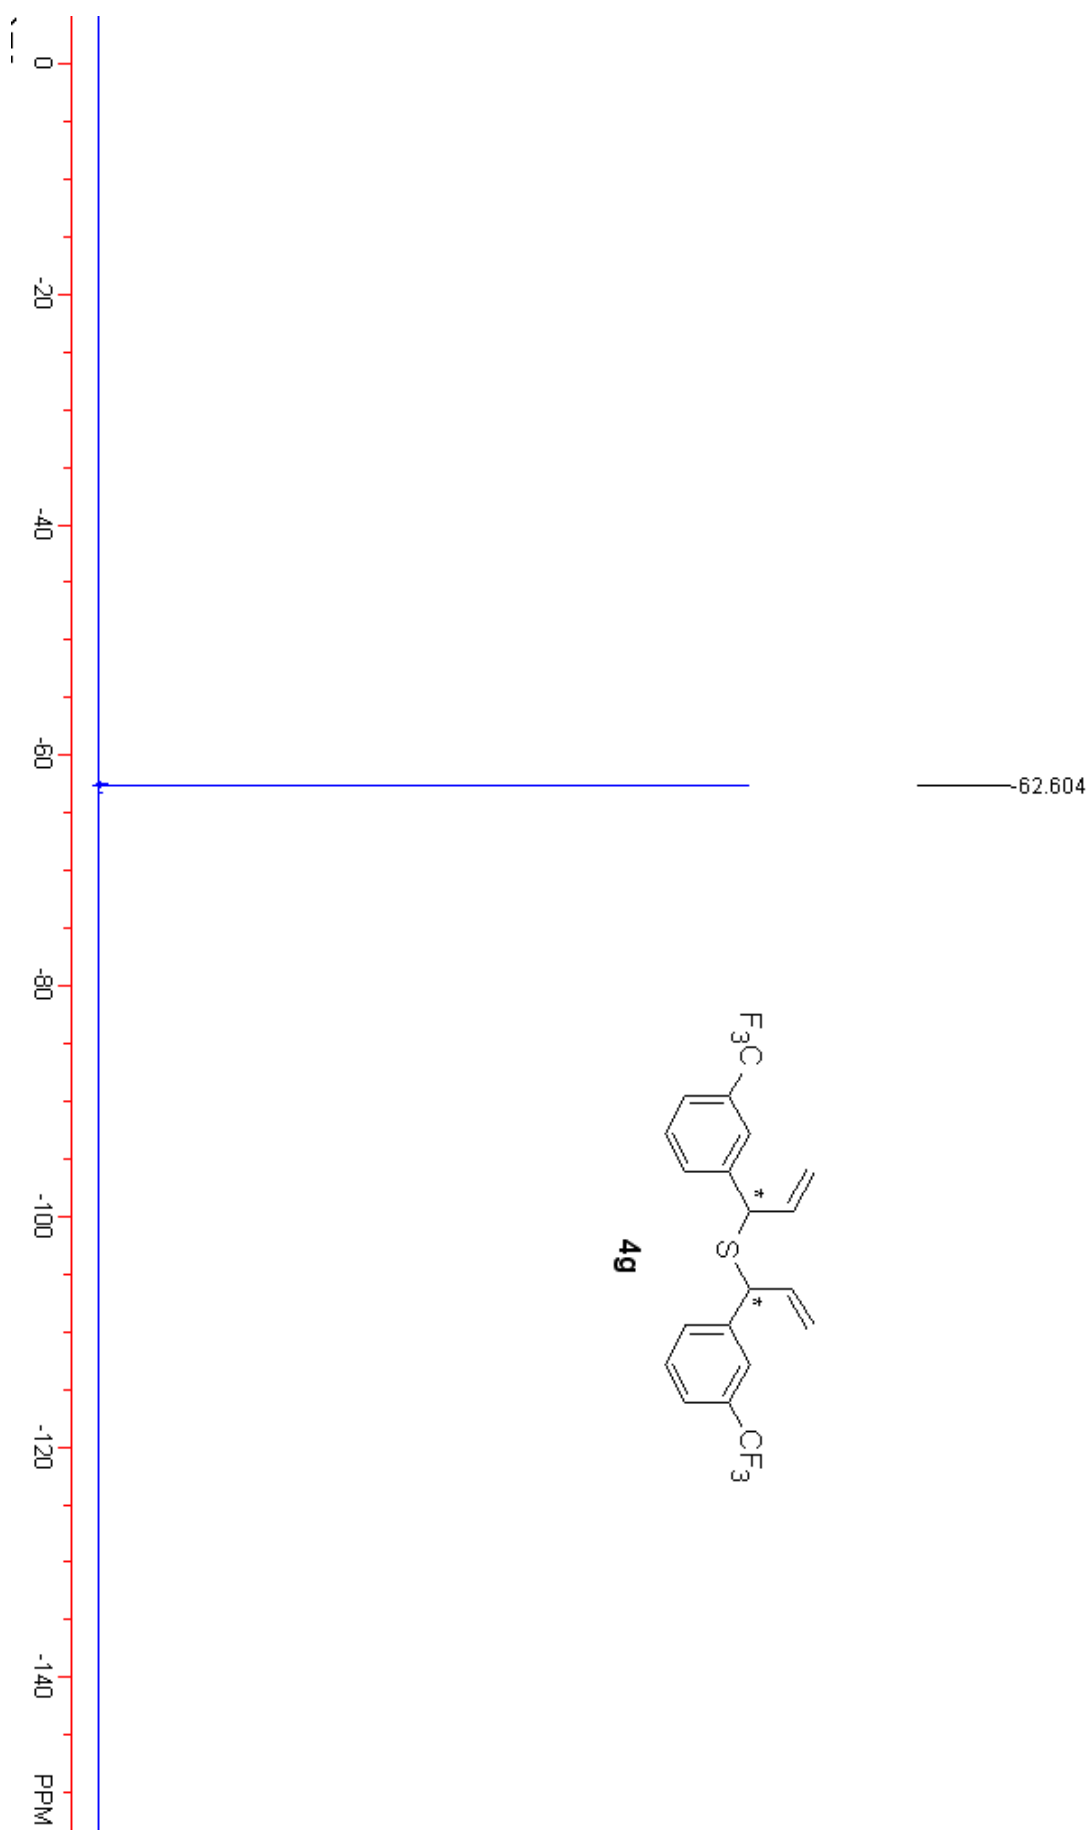

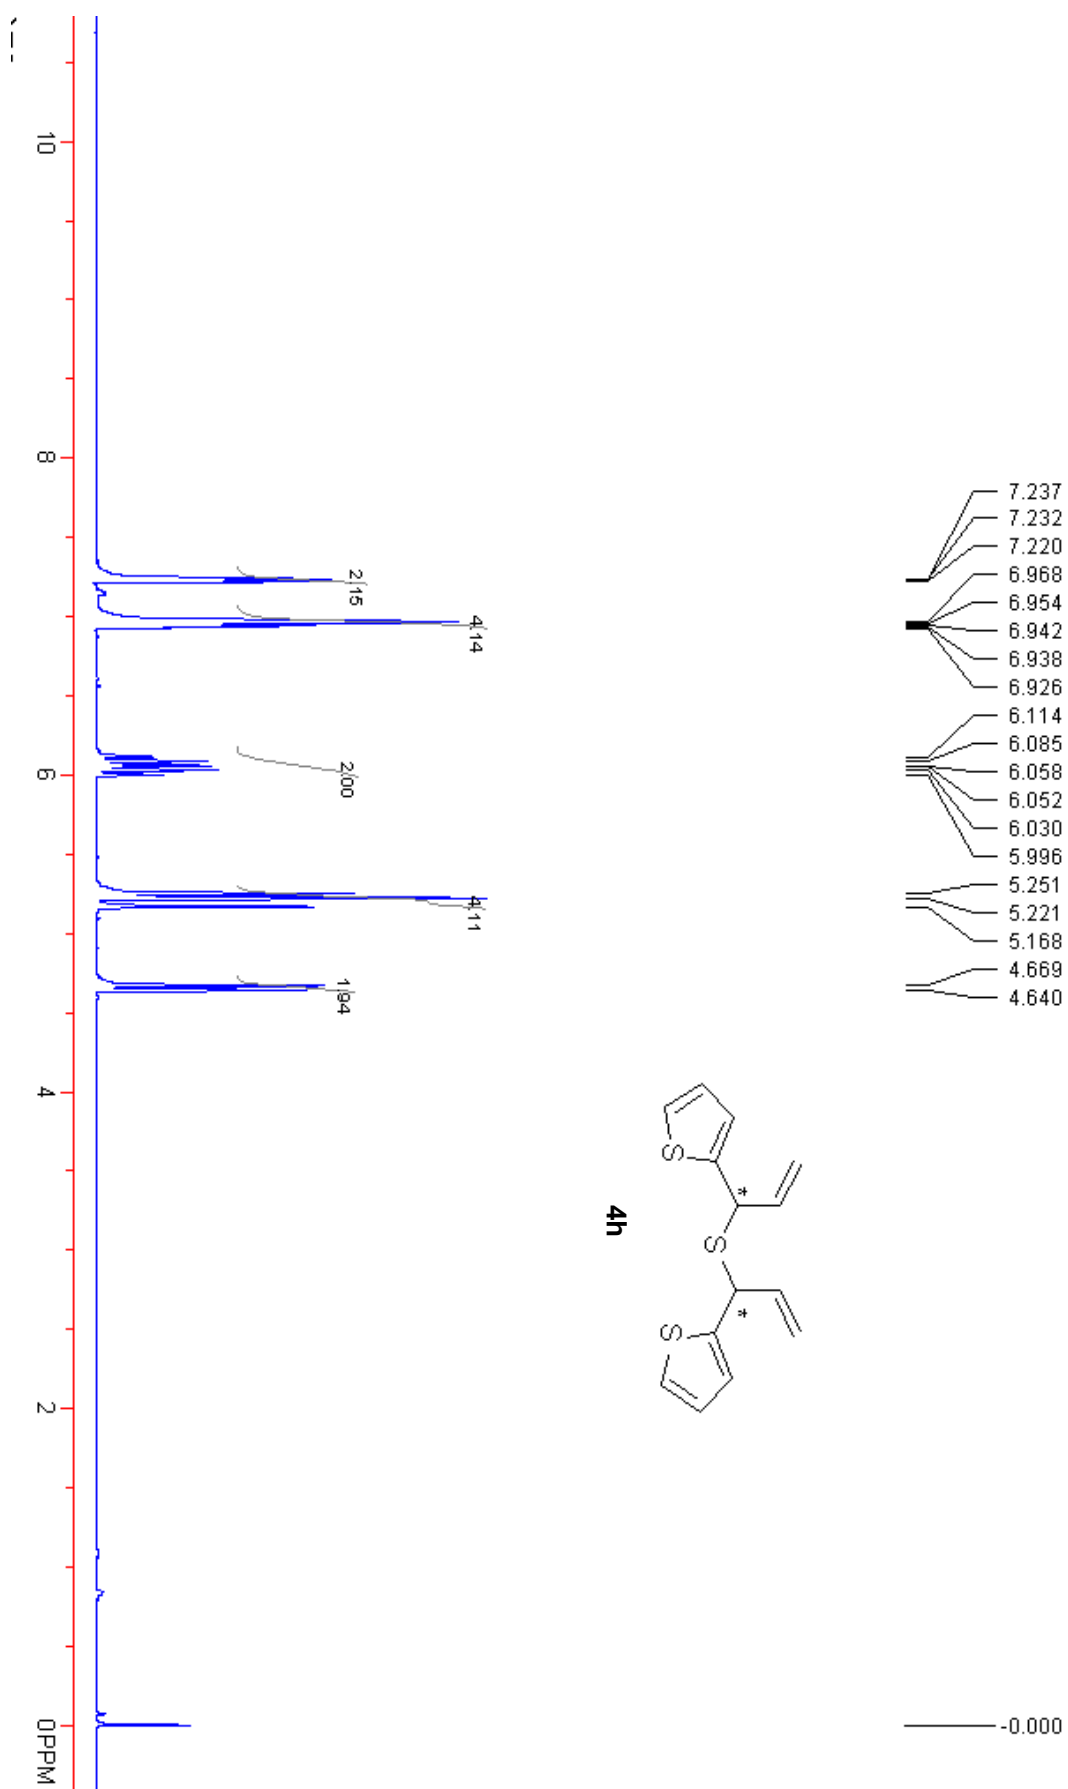

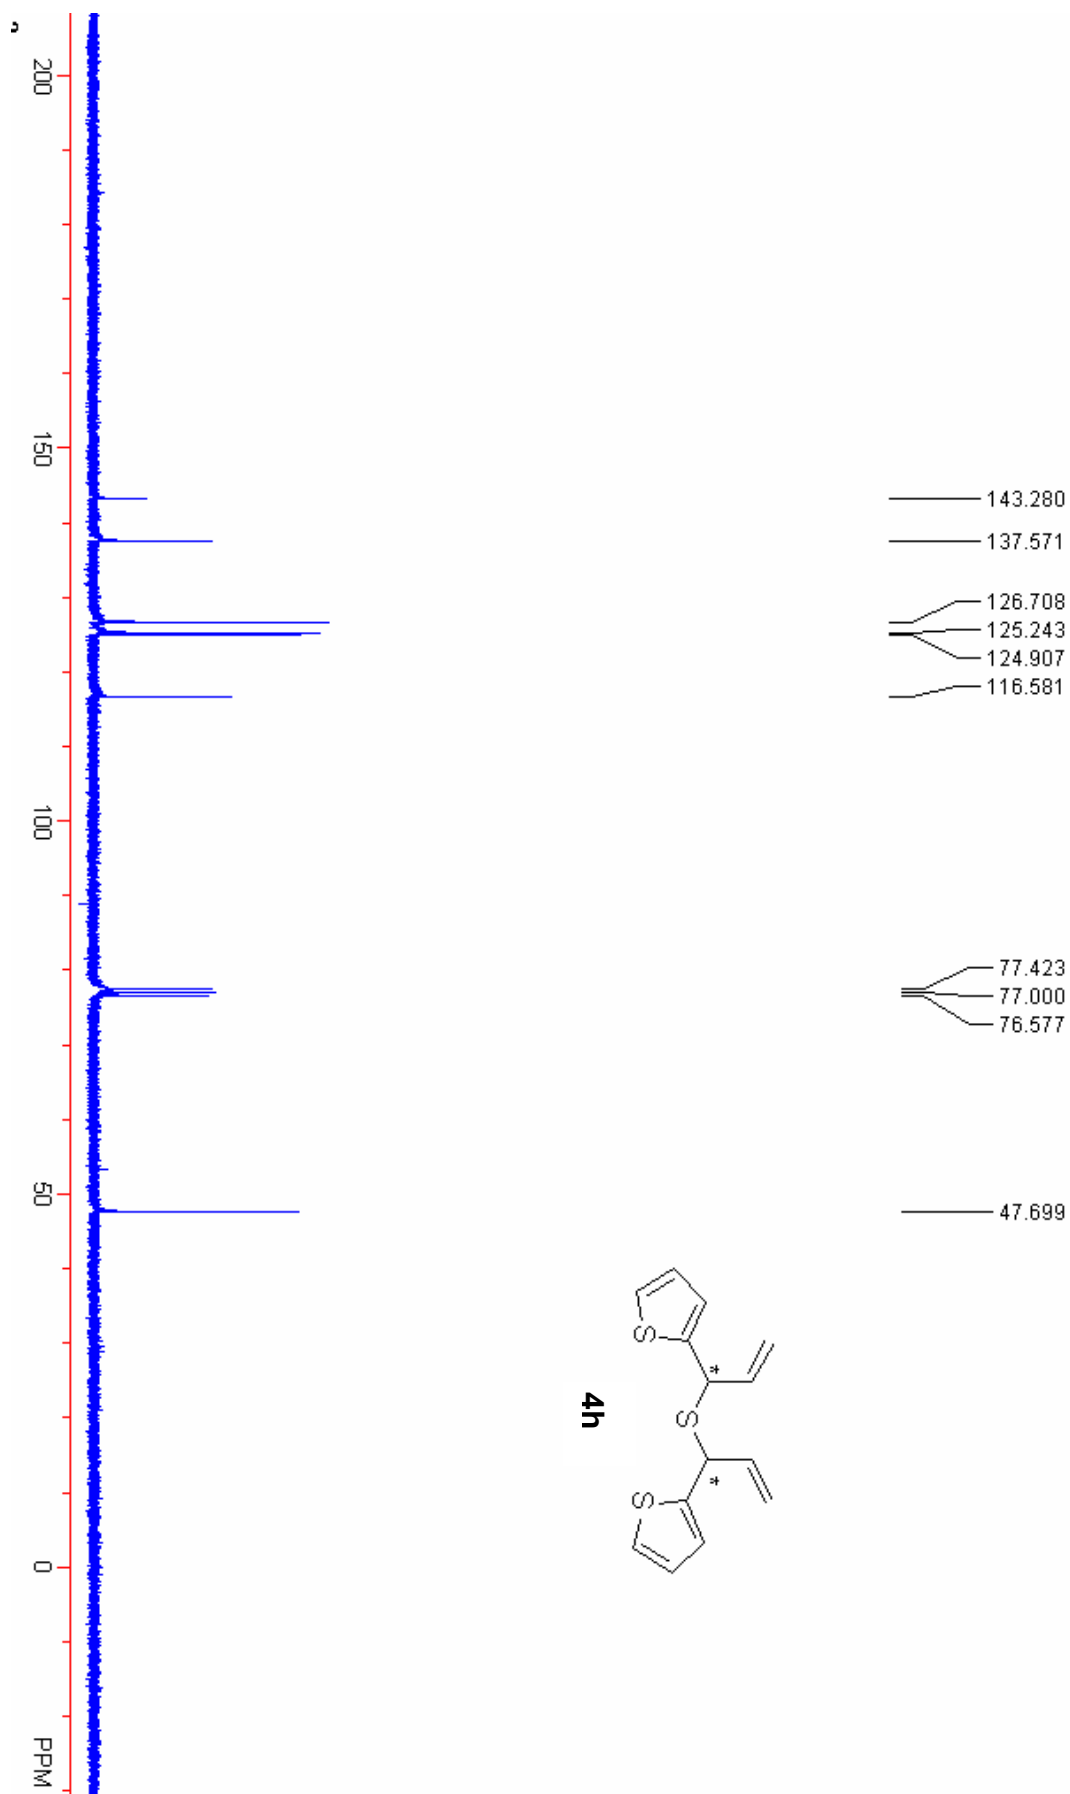

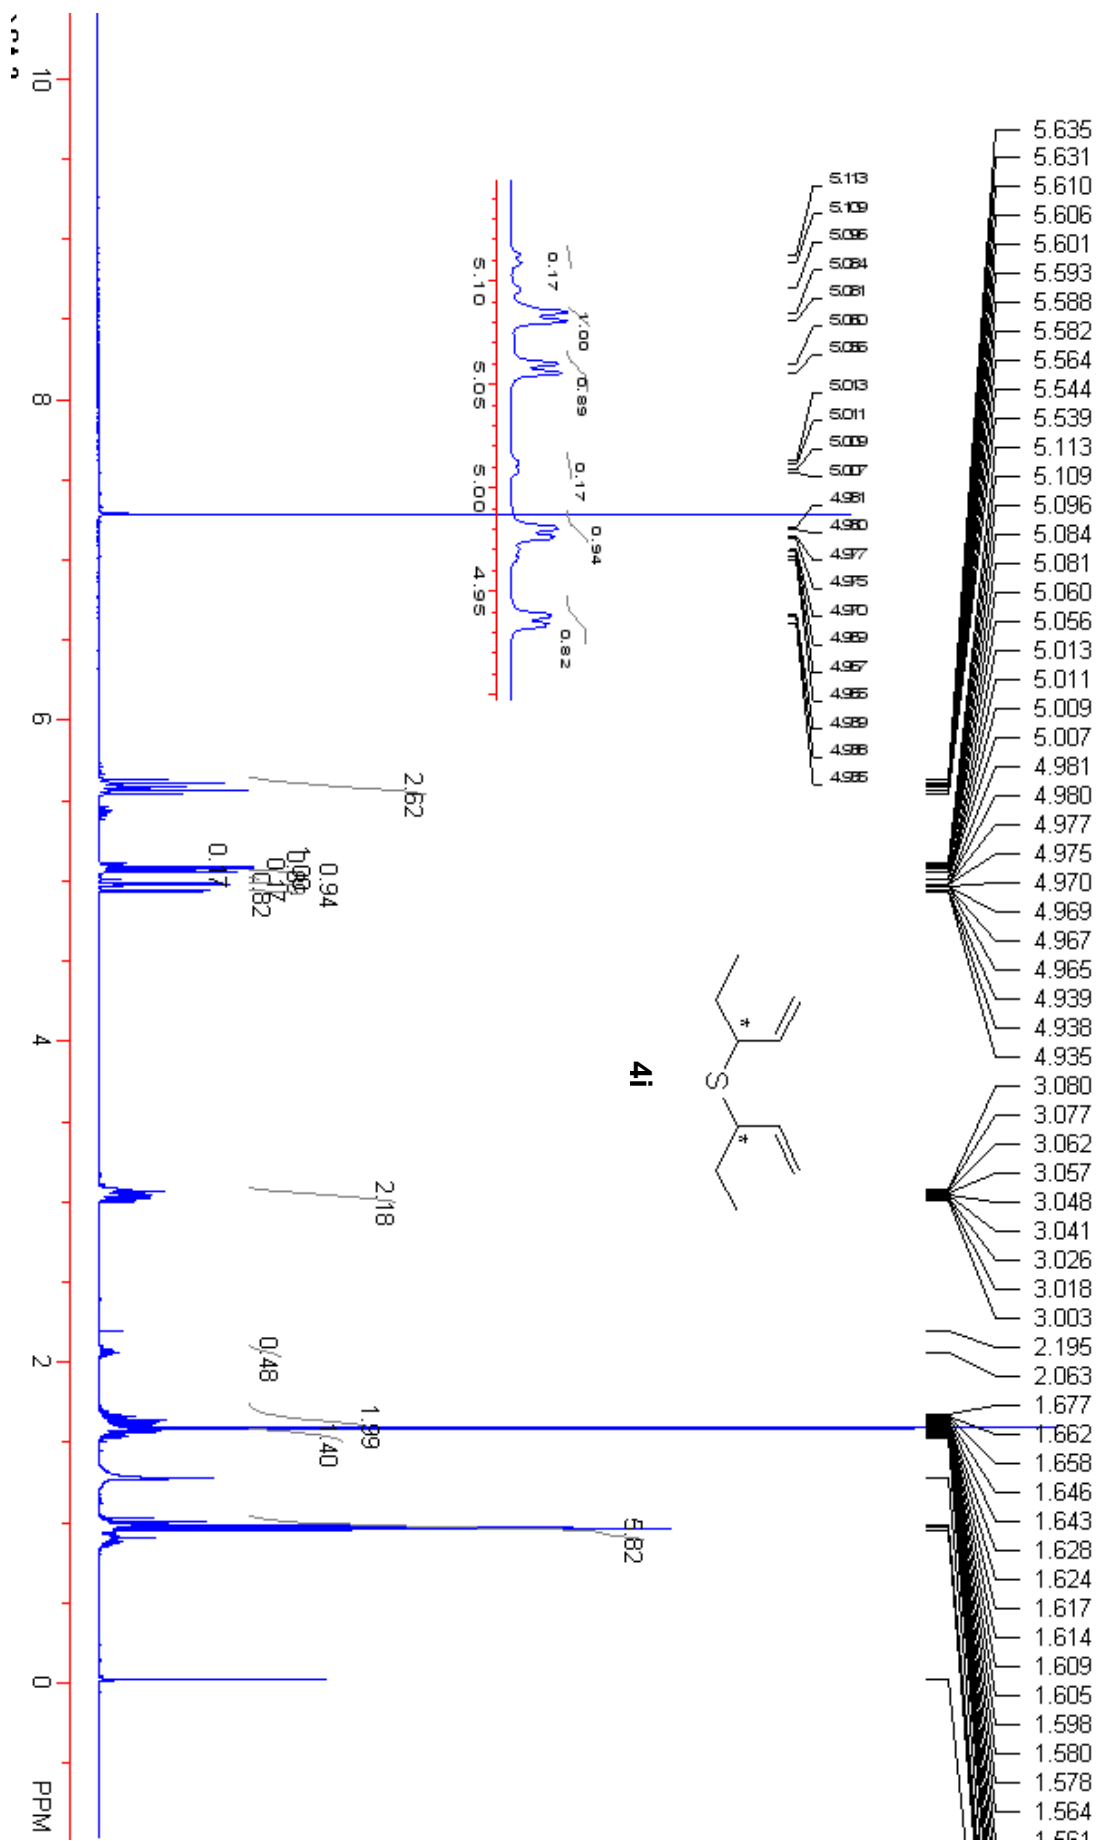

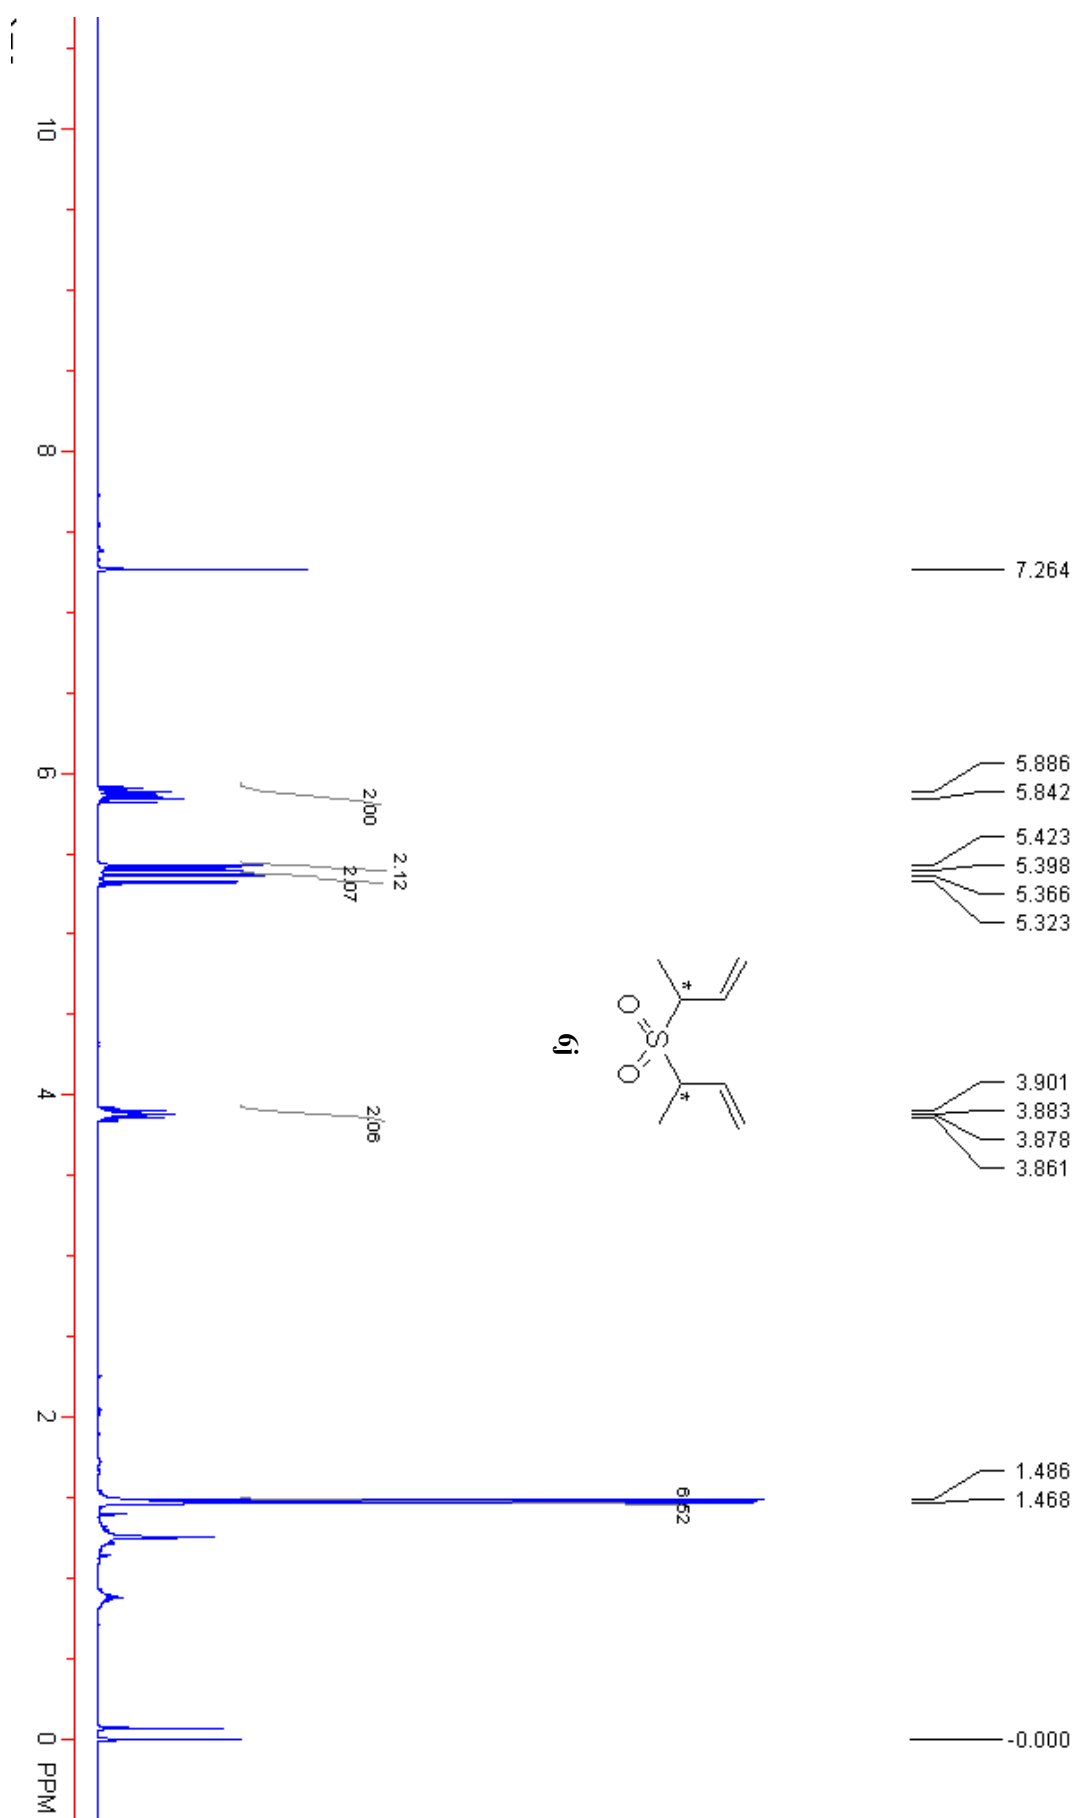

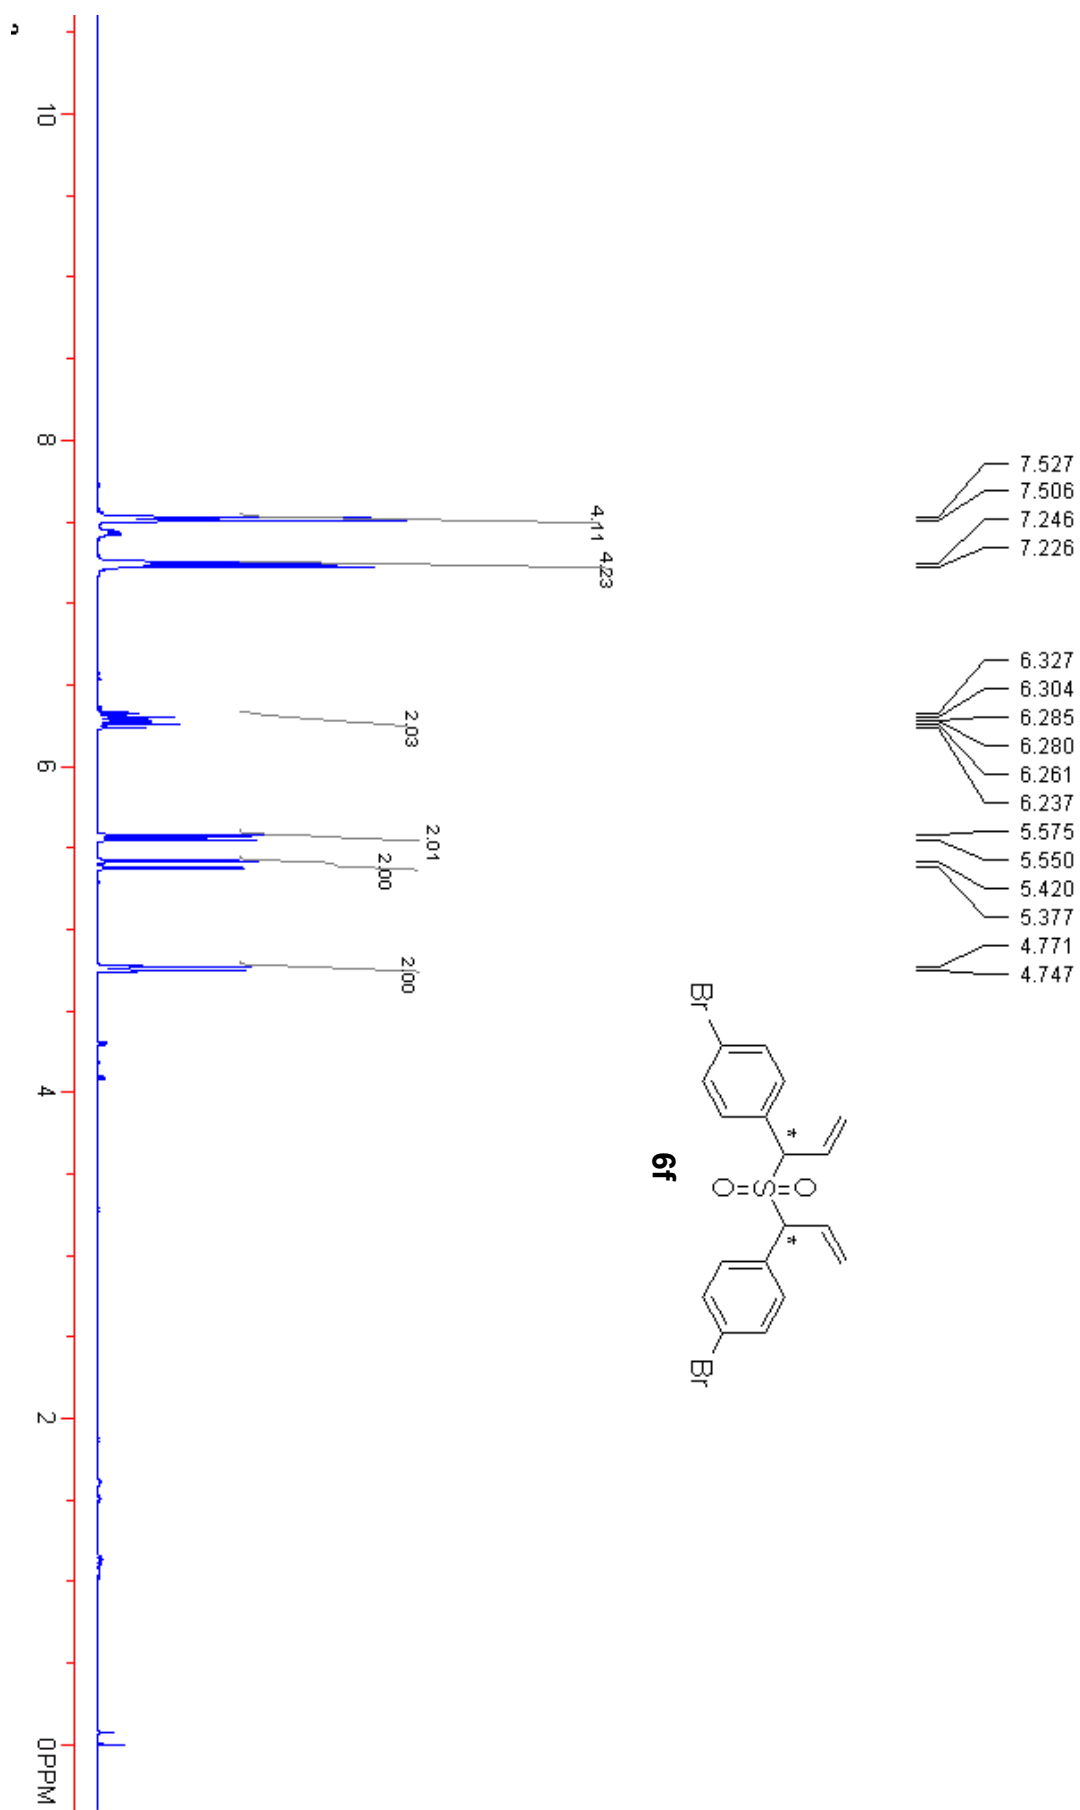

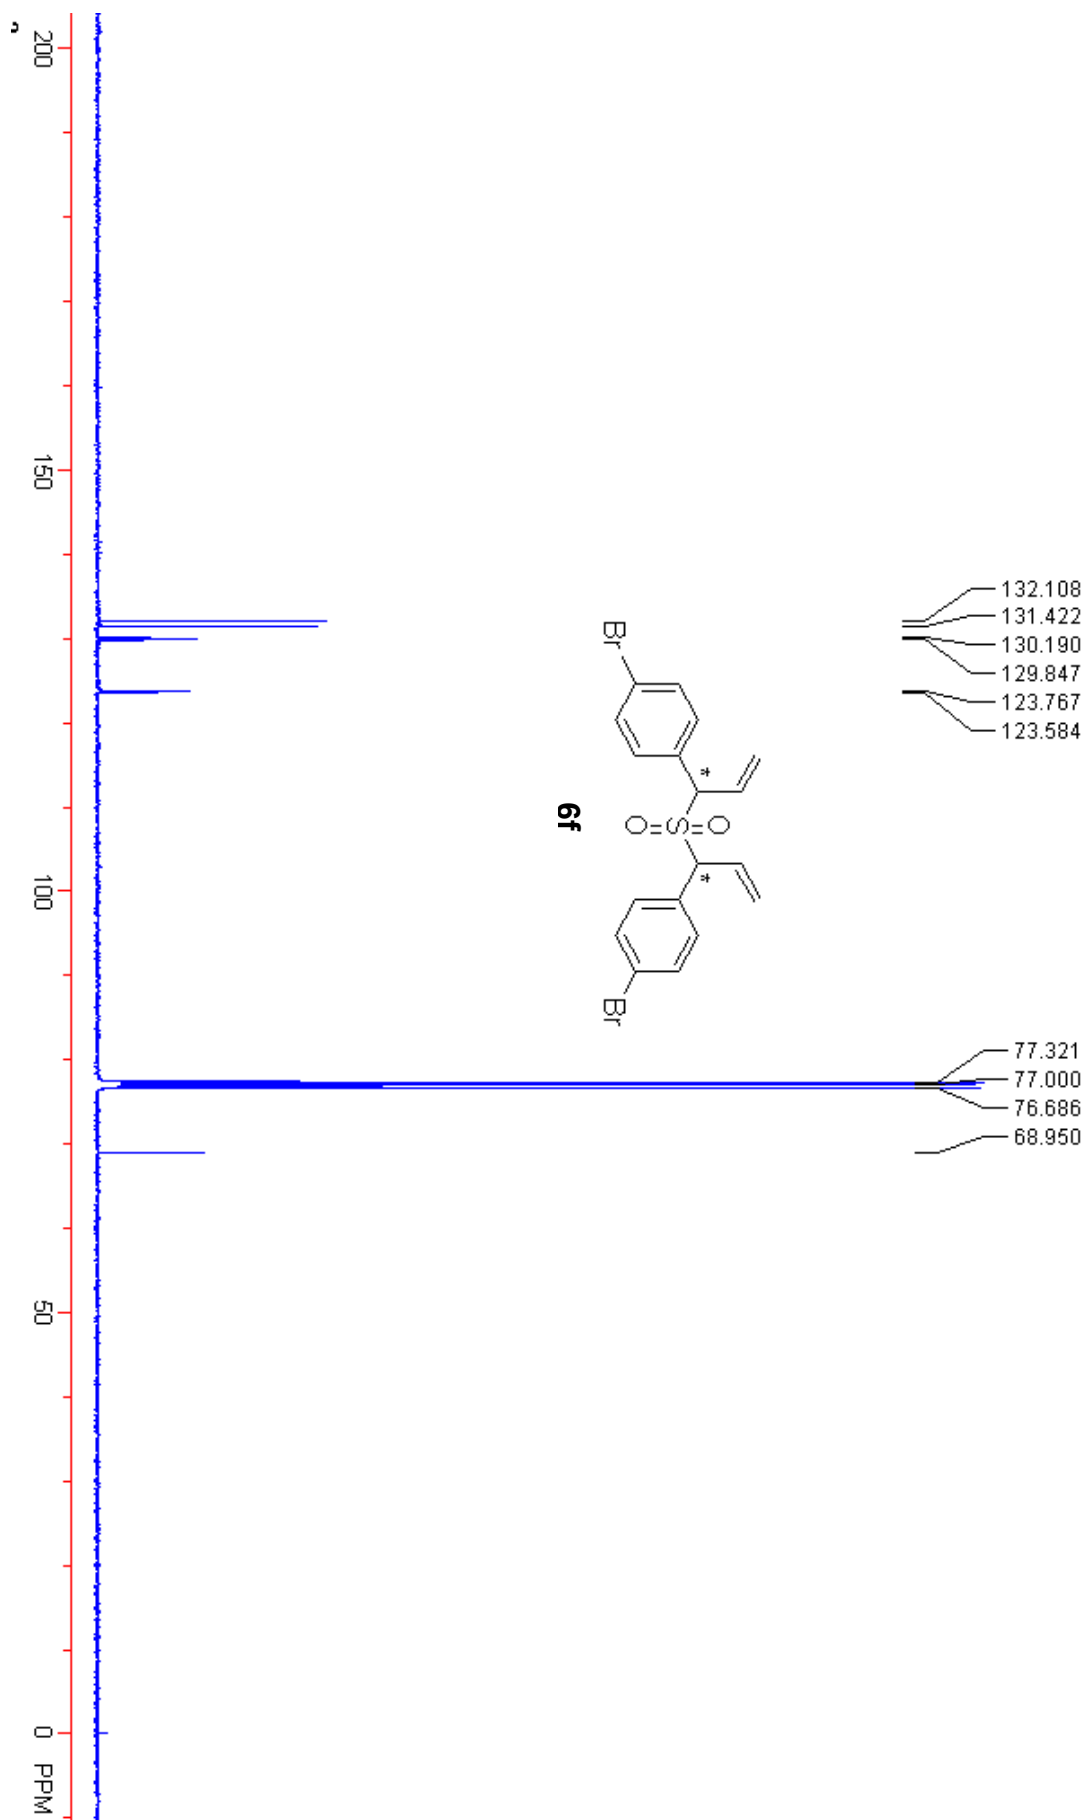

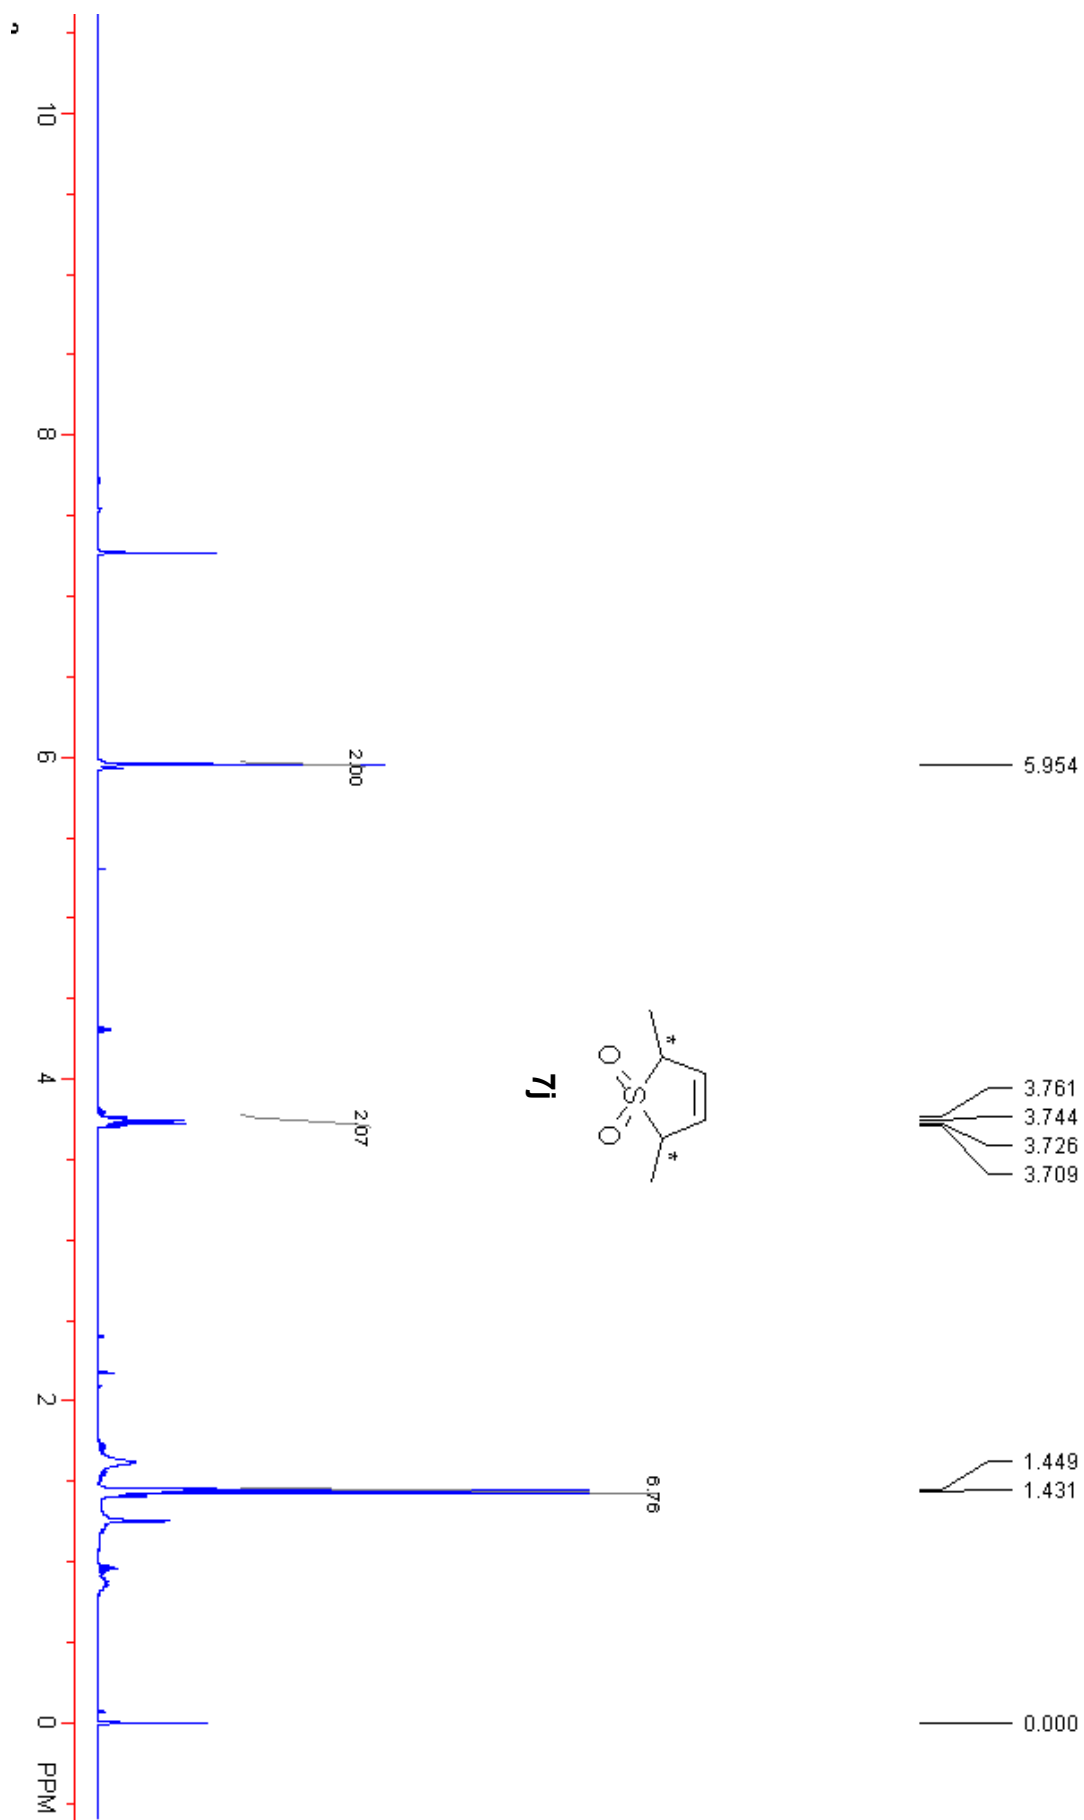



### X-ray Crystallography of (*R,R*)-6f

Single Crystal X-Ray Analysis. A representative crystal was surveyed on a Bruker APEX diffractometer. All crystallographic calculations were facilitated by the SHELXL-97 system.

|                                 |                               |
|---------------------------------|-------------------------------|
| _computing_data_collection      | 'Bruker SMART'                |
| _computing_cell_refinement      | 'Bruker SMART'                |
| _computing_data_reduction       | 'Bruker SAINT'                |
| _computing_structure_solution   | 'SHELXS-97 (Sheldrick, 1990)' |
| _computing_structure_refinement | 'SHELXL-97 (Sheldrick, 1997)' |
| _computing_molecular_graphics   | XP                            |
| _computing_publication_material | XCIF                          |

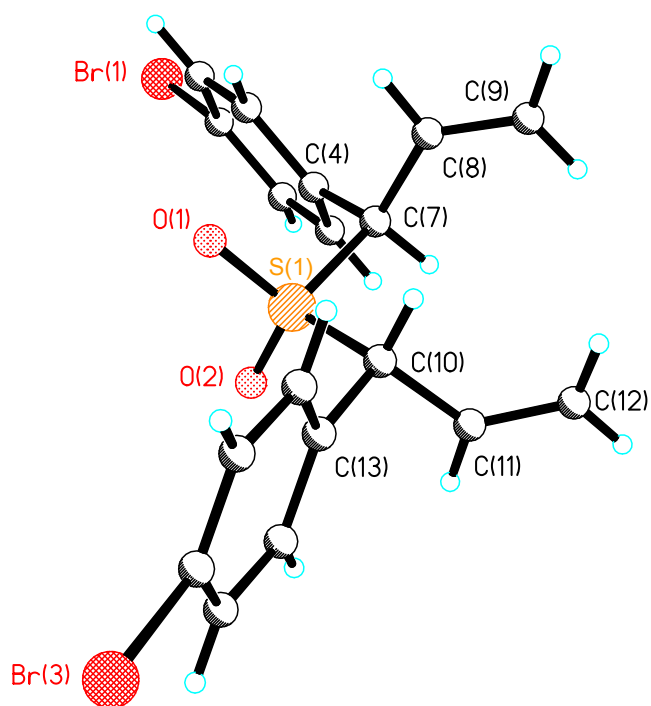

Table 1. Crystal data and structure refinement for xl.

|                     |                                                                  |
|---------------------|------------------------------------------------------------------|
| Identification code | xl                                                               |
| Empirical formula   | C <sub>18</sub> H <sub>16</sub> Br <sub>2</sub> O <sub>2</sub> S |
| Formula weight      | 456.19                                                           |
| Temperature         | 293(2) K                                                         |

|                                                 |                                                                                                                 |
|-------------------------------------------------|-----------------------------------------------------------------------------------------------------------------|
| Wavelength                                      | 0.71073 Å                                                                                                       |
| Crystal system, space group                     | Triclinic, P1                                                                                                   |
| Unit cell dimensions<br>deg.<br>90.035(12) deg. | a = 6.941(6) Å    alpha = 90.096(10) deg.<br>b = 7.130(6) Å    beta = 90.099(12)<br>c = 18.450(15) Å    gamma = |
| Volume                                          | 913.0(13) Å <sup>3</sup>                                                                                        |
| Z, Calculated density                           | 2, 1.659 Mg/m <sup>3</sup>                                                                                      |
| Absorption coefficient                          | 4.560 mm <sup>-1</sup>                                                                                          |
| F(000)                                          | 452                                                                                                             |
| Crystal size                                    | 0.25 x 0.08 x 0.04 mm                                                                                           |
| Theta range for data collection                 | 2.21 to 27.53 deg.                                                                                              |
| Limiting indices                                | -9<=h<=7, -9<=k<=8, -23<=l<=22                                                                                  |
| Reflections collected / unique                  | 4462 / 4462 [R(int) = 0.0000]                                                                                   |
| Completeness to theta = 27.53                   | 90.3 %                                                                                                          |
| Absorption correction                           | None                                                                                                            |
| Refinement method                               | Full-matrix least-squares on F <sup>2</sup>                                                                     |
| Data / restraints / parameters                  | 4462 / 11 / 367                                                                                                 |
| Goodness-of-fit on F <sup>2</sup>               | 1.060                                                                                                           |
| Final R indices [I>2sigma(I)]                   | R1 = 0.0775, wR2 = 0.2218                                                                                       |
| R indices (all data)                            | R1 = 0.0942, wR2 = 0.2412                                                                                       |
| Absolute structure parameter                    | 0.49(3)                                                                                                         |
| Largest diff. peak and hole                     | 0.800 and -1.459 e.Å <sup>-3</sup>                                                                              |

Table 2. Atomic coordinates ( $\times 10^4$ ) and equivalent isotropic displacement parameters ( $\text{\AA}^2 \times 10^3$ ) for xl.

U(eq) is defined as one third of the trace of the orthogonalized  $U_{ij}$  tensor.

|       | x         | y         | z         | U(eq)  |
|-------|-----------|-----------|-----------|--------|
| Br(1) | 6980(2)   | 21779(2)  | 2571(1)   | 72(1)  |
| Br(2) | 1982(2)   | 23244(2)  | -9538(1)  | 72(1)  |
| Br(3) | 6627(2)   | 23245(2)  | -2432(1)  | 72(1)  |
| Br(4) | 11627(2)  | 21776(2)  | -4539(1)  | 72(1)  |
| O(1)  | 5830(30)  | 24920(18) | -6238(7)  | 114(7) |
| O(2)  | 2570(30)  | 24921(19) | -5773(7)  | 107(6) |
| O(3)  | 7590(30)  | 20055(19) | -1216(7)  | 118(7) |
| O(4)  | 10910(30) | 20069(17) | -775(7)   | 102(5) |
| S(1)  | 4260(9)   | 25942(5)  | -5996(2)  | 72(1)  |
| S(2)  | 9239(9)   | 19022(6)  | -997(2)   | 74(1)  |
| C(1)  | 5981(14)  | 24439(12) | -3309(4)  | 53(3)  |
| C(2)  | 4265(12)  | 25414(14) | -3402(4)  | 54(3)  |
| C(3)  | 3907(11)  | 26355(14) | -4048(4)  | 61(4)  |
| C(4)  | 5265(13)  | 26320(13) | -4601(4)  | 49(3)  |
| C(5)  | 6981(12)  | 25344(14) | -4508(4)  | 61(4)  |
| C(6)  | 7339(12)  | 24404(13) | -3862(5)  | 65(4)  |
| C(7)  | 4911(18)  | 27505(17) | -5270(6)  | 47(3)  |
| C(8)  | 6620(20)  | 28684(17) | -5476(9)  | 63(4)  |
| C(9)  | 6490(30)  | 30516(19) | -5468(10) | 76(5)  |
| C(10) | 3558(19)  | 27496(16) | -6726(6)  | 48(3)  |
| C(11) | 1860(20)  | 28666(16) | -6494(8)  | 58(4)  |
| C(12) | 1960(30)  | 30531(18) | -6502(9)  | 73(5)  |
| C(13) | 3165(14)  | 26388(12) | -7390(4)  | 53(3)  |
| C(14) | 4543(11)  | 26393(12) | -7936(5)  | 57(3)  |
| C(15) | 4198(12)  | 25436(13) | -8580(4)  | 52(3)  |
| C(16) | 2475(14)  | 24474(12) | -8679(4)  | 53(3)  |
| C(17) | 1097(11)  | 24469(13) | -8133(5)  | 67(4)  |
| C(18) | 1442(12)  | 25426(13) | -7489(4)  | 58(4)  |
| C(19) | 11011(15) | 20503(12) | -3691(4)  | 54(3)  |
| C(20) | 9288(13)  | 19543(14) | -3592(4)  | 63(4)  |
| C(21) | 8936(11)  | 18614(14) | -2944(5)  | 60(4)  |

|       |           |           |           |       |
|-------|-----------|-----------|-----------|-------|
| C(22) | 10307(14) | 18645(14) | -2394(4)  | 52(3) |
| C(23) | 12030(13) | 19605(16) | -2492(5)  | 76(6) |
| C(24) | 12383(12) | 20534(15) | -3141(5)  | 67(4) |
| C(25) | 9930(20)  | 17434(18) | -1713(7)  | 52(3) |
| C(26) | 11630(20) | 16260(20) | -1480(9)  | 80(6) |
| C(27) | 11560(30) | 14410(20) | -1457(10) | 73(5) |
| C(28) | 8530(20)  | 17469(16) | -272(7)   | 49(3) |
| C(29) | 6840(20)  | 16230(20) | -475(9)   | 74(6) |
| C(30) | 6890(30)  | 14370(20) | -479(10)  | 68(4) |
| C(31) | 8149(14)  | 18592(12) | 404(4)    | 51(3) |
| C(32) | 6425(12)  | 19545(14) | 508(4)    | 70(5) |
| C(33) | 6088(11)  | 20486(14) | 1156(5)   | 65(4) |
| C(34) | 7475(14)  | 20474(13) | 1700(4)   | 53(3) |
| C(35) | 9199(12)  | 19520(14) | 1596(4)   | 67(4) |
| C(36) | 9536(11)  | 18580(13) | 948(5)    | 60(4) |

---

Table 3. Bond lengths [Å] and angles [deg] for xl.

---

|             |           |
|-------------|-----------|
| Br(1)-C(34) | 1.888(7)  |
| Br(2)-C(16) | 1.842(6)  |
| Br(3)-C(1)  | 1.884(6)  |
| Br(4)-C(19) | 1.861(6)  |
| O(1)-S(1)   | 1.384(18) |
| O(2)-S(1)   | 1.443(16) |
| O(3)-S(2)   | 1.422(17) |
| O(4)-S(2)   | 1.439(17) |
| S(1)-C(7)   | 1.797(13) |
| S(1)-C(10)  | 1.812(11) |
| S(2)-C(25)  | 1.803(13) |
| S(2)-C(28)  | 1.807(12) |
| C(1)-C(2)   | 1.3900    |
| C(1)-C(6)   | 1.3900    |
| C(2)-C(3)   | 1.3900    |
| C(3)-C(4)   | 1.3900    |
| C(4)-C(5)   | 1.3900    |
| C(4)-C(7)   | 1.518(13) |
| C(5)-C(6)   | 1.3900    |
| C(7)-C(8)   | 1.501(9)  |
| C(8)-C(9)   | 1.309(10) |
| C(10)-C(13) | 1.482(14) |
| C(10)-C(11) | 1.506(9)  |
| C(11)-C(12) | 1.331(9)  |
| C(13)-C(14) | 1.3900    |
| C(13)-C(18) | 1.3900    |
| C(14)-C(15) | 1.3900    |
| C(15)-C(16) | 1.3900    |
| C(16)-C(17) | 1.3900    |
| C(17)-C(18) | 1.3900    |
| C(19)-C(20) | 1.3900    |
| C(19)-C(24) | 1.3900    |
| C(20)-C(21) | 1.3900    |
| C(21)-C(22) | 1.3900    |
| C(22)-C(23) | 1.3900    |
| C(22)-C(25) | 1.548(13) |
| C(23)-C(24) | 1.3900    |
| C(25)-C(26) | 1.512(10) |
| C(26)-C(27) | 1.321(10) |
| C(28)-C(31) | 1.505(14) |

|                   |           |
|-------------------|-----------|
| C(28)-C(29)       | 1.510(10) |
| C(29)-C(30)       | 1.327(9)  |
| C(31)-C(32)       | 1.3900    |
| C(31)-C(36)       | 1.3900    |
| C(32)-C(33)       | 1.3900    |
| C(33)-C(34)       | 1.3900    |
| C(34)-C(35)       | 1.3900    |
| C(35)-C(36)       | 1.3900    |
| O(1)-S(1)-O(2)    | 117.9(10) |
| O(1)-S(1)-C(7)    | 111.7(9)  |
| O(2)-S(1)-C(7)    | 107.7(7)  |
| O(1)-S(1)-C(10)   | 107.1(7)  |
| O(2)-S(1)-C(10)   | 107.6(8)  |
| C(7)-S(1)-C(10)   | 104.0(6)  |
| O(3)-S(2)-O(4)    | 117.5(10) |
| O(3)-S(2)-C(25)   | 109.4(8)  |
| O(4)-S(2)-C(25)   | 108.5(9)  |
| O(3)-S(2)-C(28)   | 107.9(9)  |
| O(4)-S(2)-C(28)   | 109.2(7)  |
| C(25)-S(2)-C(28)  | 103.4(6)  |
| C(2)-C(1)-C(6)    | 120.0     |
| C(2)-C(1)-Br(3)   | 122.4(5)  |
| C(6)-C(1)-Br(3)   | 117.5(5)  |
| C(1)-C(2)-C(3)    | 120.0     |
| C(4)-C(3)-C(2)    | 120.0     |
| C(3)-C(4)-C(5)    | 120.0     |
| C(3)-C(4)-C(7)    | 118.6(7)  |
| C(5)-C(4)-C(7)    | 121.2(7)  |
| C(6)-C(5)-C(4)    | 120.0     |
| C(5)-C(6)-C(1)    | 120.0     |
| C(8)-C(7)-C(4)    | 113.0(11) |
| C(8)-C(7)-S(1)    | 110.8(9)  |
| C(4)-C(7)-S(1)    | 107.5(8)  |
| C(9)-C(8)-C(7)    | 120.3(14) |
| C(13)-C(10)-C(11) | 112.7(11) |
| C(13)-C(10)-S(1)  | 109.8(7)  |
| C(11)-C(10)-S(1)  | 109.8(9)  |
| C(12)-C(11)-C(10) | 120.6(13) |
| C(14)-C(13)-C(18) | 120.0     |
| C(14)-C(13)-C(10) | 118.1(8)  |
| C(18)-C(13)-C(10) | 121.8(8)  |
| C(15)-C(14)-C(13) | 120.0     |
| C(14)-C(15)-C(16) | 120.0     |

|                   |           |
|-------------------|-----------|
| C(15)-C(16)-C(17) | 120.0     |
| C(15)-C(16)-Br(2) | 120.3(5)  |
| C(17)-C(16)-Br(2) | 119.6(5)  |
| C(18)-C(17)-C(16) | 120.0     |
| C(17)-C(18)-C(13) | 120.0     |
| C(20)-C(19)-C(24) | 120.0     |
| C(20)-C(19)-Br(4) | 123.3(5)  |
| C(24)-C(19)-Br(4) | 116.7(5)  |
| C(19)-C(20)-C(21) | 120.0     |
| C(20)-C(21)-C(22) | 120.0     |
| C(23)-C(22)-C(21) | 120.0     |
| C(23)-C(22)-C(25) | 121.9(8)  |
| C(21)-C(22)-C(25) | 117.9(8)  |
| C(22)-C(23)-C(24) | 120.0     |
| C(23)-C(24)-C(19) | 120.0     |
| C(26)-C(25)-C(22) | 114.1(11) |
| C(26)-C(25)-S(2)  | 110.4(10) |
| C(22)-C(25)-S(2)  | 106.8(8)  |
| C(27)-C(26)-C(25) | 122.4(14) |
| C(31)-C(28)-C(29) | 112.2(11) |
| C(31)-C(28)-S(2)  | 109.7(7)  |
| C(29)-C(28)-S(2)  | 112.8(10) |
| C(30)-C(29)-C(28) | 124.2(14) |
| C(32)-C(31)-C(36) | 120.0     |
| C(32)-C(31)-C(28) | 121.7(7)  |
| C(36)-C(31)-C(28) | 118.3(7)  |
| C(31)-C(32)-C(33) | 120.0     |
| C(34)-C(33)-C(32) | 120.0     |
| C(35)-C(34)-C(33) | 120.0     |
| C(35)-C(34)-Br(1) | 121.0(5)  |
| C(33)-C(34)-Br(1) | 119.0(5)  |
| C(34)-C(35)-C(36) | 120.0     |
| C(35)-C(36)-C(31) | 120.0     |

---

Symmetry transformations used to generate equivalent atoms:

Table 4. Anisotropic displacement parameters ( $\text{Å}^2 \times 10^3$ ) for xl.  
 The anisotropic displacement factor exponent takes the form:  
 $-2 \pi^2 [ h^2 a^{*2} U_{11} + \dots + 2 h k a^* b^* U_{12} ]$

|       | U11     | U22    | U33    | U23    | U13    |         |
|-------|---------|--------|--------|--------|--------|---------|
| U12   |         |        |        |        |        |         |
| Br(1) | 95(1)   | 81(1)  | 40(1)  | -13(1) | 20(1)  | -5(1)   |
| Br(2) | 98(1)   | 81(1)  | 38(1)  | -12(1) | -15(1) | 9(1)    |
| Br(3) | 98(1)   | 79(1)  | 39(1)  | 15(1)  | -15(1) | -5(1)   |
| Br(4) | 96(1)   | 79(1)  | 41(1)  | 14(1)  | 19(1)  | 6(1)    |
| O(1)  | 240(20) | 62(8)  | 44(7)  | -17(6) | -26(9) | 61(10)  |
| O(2)  | 203(17) | 76(9)  | 43(7)  | 18(6)  | -12(8) | -69(10) |
| O(3)  | 240(20) | 65(8)  | 47(7)  | 16(6)  | 30(10) | 82(11)  |
| O(4)  | 200(17) | 58(7)  | 47(7)  | -10(6) | 12(8)  | -48(8)  |
| S(1)  | 145(4)  | 40(2)  | 31(2)  | -3(2)  | -9(2)  | 7(2)    |
| S(2)  | 149(4)  | 43(2)  | 29(2)  | -2(1)  | 16(2)  | 3(2)    |
| C(1)  | 84(10)  | 43(7)  | 32(6)  | -9(5)  | 0(6)   | 9(6)    |
| C(2)  | 82(10)  | 45(8)  | 37(7)  | 14(6)  | 8(6)   | 6(6)    |
| C(3)  | 66(9)   | 83(11) | 35(7)  | -14(7) | 16(6)  | 5(7)    |
| C(4)  | 65(8)   | 59(9)  | 22(6)  | -3(5)  | 17(5)  | 10(6)   |
| C(5)  | 83(10)  | 49(9)  | 52(9)  | -4(7)  | 20(7)  | 19(7)   |
| C(6)  | 96(12)  | 52(9)  | 46(8)  | 7(7)   | 5(8)   | 13(8)   |
| C(7)  | 68(8)   | 48(7)  | 24(5)  | -1(5)  | 13(5)  | 0(6)    |
| C(8)  | 94(11)  | 48(10) | 45(9)  | 13(7)  | 27(8)  | 12(7)   |
| C(9)  | 87(12)  | 90(14) | 50(10) | 9(9)   | 3(8)   | -21(9)  |
| C(10) | 84(9)   | 33(6)  | 27(6)  | 11(5)  | 4(6)   | -1(6)   |
| C(11) | 87(11)  | 46(9)  | 41(8)  | 3(6)   | 8(7)   | -3(7)   |
| C(12) | 92(12)  | 75(12) | 53(10) | -23(8) | -2(8)  | 25(9)   |
| C(13) | 79(10)  | 42(8)  | 37(7)  | 6(6)   | 3(6)   | -1(6)   |
| C(14) | 71(9)   | 57(9)  | 44(8)  | 3(7)   | 7(7)   | -2(6)   |
| C(15) | 78(9)   | 52(8)  | 27(6)  | 1(5)   | 15(6)  | 1(6)    |
| C(16) | 84(10)  | 43(7)  | 31(6)  | -2(5)  | -5(6)  | 9(6)    |
| C(17) | 76(10)  | 69(10) | 56(10) | -4(8)  | 8(8)   | -14(8)  |
| C(18) | 76(10)  | 62(10) | 35(7)  | 6(7)   | 10(6)  | -8(7)   |
| C(19) | 97(11)  | 35(7)  | 29(6)  | -6(5)  | 16(6)  | 3(6)    |
| C(20) | 105(12) | 47(8)  | 35(7)  | 6(6)   | 1(7)   | -14(7)  |
| C(21) | 63(9)   | 79(10) | 38(7)  | -15(7) | 1(6)   | -3(7)   |



|       |         |         |        |        |        |         |
|-------|---------|---------|--------|--------|--------|---------|
| C(22) | 69(9)   | 60(9)   | 26(6)  | 0(6)   | 6(6)   | -1(6)   |
| C(23) | 85(11)  | 102(14) | 40(9)  | 21(9)  | -24(8) | -25(10) |
| C(24) | 80(11)  | 65(10)  | 55(9)  | 4(8)   | 18(8)  | -14(8)  |
| C(25) | 86(10)  | 42(7)   | 28(6)  | -1(5)  | 4(6)   | 1(6)    |
| C(26) | 86(12)  | 115(17) | 38(9)  | 14(9)  | -5(8)  | -31(11) |
| C(27) | 86(11)  | 62(11)  | 70(11) | 10(9)  | 2(9)   | 25(8)   |
| C(28) | 90(10)  | 30(6)   | 27(6)  | 3(5)   | -1(6)  | 9(6)    |
| C(29) | 73(11)  | 110(16) | 39(8)  | -23(9) | -7(7)  | 30(10)  |
| C(30) | 84(11)  | 56(10)  | 64(11) | 8(8)   | 9(8)   | -13(8)  |
| C(31) | 87(10)  | 34(7)   | 34(6)  | 11(5)  | 0(6)   | 8(6)    |
| C(32) | 110(13) | 74(11)  | 26(7)  | -10(7) | -2(7)  | 32(10)  |
| C(33) | 65(9)   | 75(10)  | 54(9)  | 4(8)   | 8(7)   | 11(7)   |
| C(34) | 72(9)   | 49(8)   | 37(7)  | 11(6)  | 22(6)  | 5(6)    |
| C(35) | 90(11)  | 75(11)  | 36(7)  | -12(7) | -10(7) | 6(8)    |
| C(36) | 74(9)   | 64(10)  | 41(8)  | -5(7)  | 7(7)   | 8(7)    |

---

Table 5. Hydrogen coordinates ( $\times 10^4$ ) and isotropic displacement parameters ( $\text{Å}^2 \times 10^3$ ) for xl.

|        | x     | y     | z     | U(eq) |
|--------|-------|-------|-------|-------|
| H(2B)  | 3357  | 25438 | -3032 | 65    |
| H(3B)  | 2759  | 27008 | -4110 | 73    |
| H(5A)  | 7889  | 25321 | -4878 | 74    |
| H(6A)  | 8487  | 23751 | -3800 | 78    |
| H(7A)  | 3818  | 28339 | -5175 | 56    |
| H(8A)  | 7765  | 28110 | -5609 | 75    |
| H(9A)  | 5346  | 31093 | -5335 | 91    |
| H(9B)  | 7554  | 31240 | -5596 | 91    |
| H(10A) | 4639  | 28341 | -6826 | 58    |
| H(11A) | 734   | 28081 | -6345 | 69    |
| H(12A) | 3087  | 31122 | -6652 | 88    |
| H(12B) | 906   | 31241 | -6358 | 88    |
| H(14A) | 5696  | 27037 | -7870 | 69    |
| H(15A) | 5121  | 25440 | -8945 | 63    |
| H(17A) | -56   | 23826 | -8199 | 80    |
| H(18A) | 519   | 25423 | -7124 | 69    |
| H(20A) | 8371  | 19523 | -3960 | 75    |
| H(21A) | 7783  | 17972 | -2878 | 72    |
| H(23A) | 12948 | 19626 | -2125 | 91    |
| H(24A) | 13536 | 21176 | -3206 | 80    |
| H(25A) | 8841  | 16596 | -1815 | 63    |
| H(26A) | 12767 | 16855 | -1347 | 95    |
| H(27A) | 10432 | 13783 | -1588 | 87    |
| H(27B) | 12633 | 13726 | -1311 | 87    |
| H(28A) | 9622  | 16643 | -171  | 59    |
| H(29A) | 5691  | 16815 | -605  | 89    |
| H(30A) | 8021  | 13752 | -352  | 82    |
| H(30B) | 5803  | 13692 | -609  | 82    |
| H(32A) | 5496  | 19554 | 144   | 84    |
| H(33A) | 4934  | 21124 | 1225  | 77    |
| H(35A) | 10127 | 19512 | 1961  | 80    |
| H(36A) | 10690 | 17942 | 879   | 72    |
